# Supplementary material for: Extracellular Vesicle–Packaged circATP2B4 Mediates M2 Macrophage Polarization via miR-532-3p/SREBF1 Axis to Promote Epithelial Ovarian Cancer Metastasis
Source: Oxford University Press journal article supplement (doi:10.1158/2326-6066.cir-22-0410), 2022-12-13
Supplement: cir-22-0410_table_s6-8_suppst6-st8.xls [file cir-22-0410_table_s6-8_suppst6-st8.xls]

## Sheet: table S6
Supplementary Table S6. TCGA-OV analysis of infiltrating cells in the immune microenvironment by bulkRNAseq in cibersort.
samples	Macrophages M0	Macrophages M2	Macrophages M1	Monocytes	B cells naive	B cells memory	Plasma cells	T cells CD8	T cells CD4 naive	T cells CD4 memory resting	T cells CD4 memory activated	T cells follicular helper	T cells regulatory (Tregs)	T cells gamma delta	NK cells resting	NK cells activated	Dendritic cells resting	Dendritic cells activated	Mast cells resting	Mast cells activated	Eosinophils	Neutrophils
TCGA-23-1120-01A	0.184622	0.153057	0.211761	0.0121679	0	0.0263979	0	0.0229884	0	0.162438	0.00672811	0.0558158	0.0653716	0	0	0.0561791	0	0	0.0420508	0	0	0.00042244
TCGA-29-1695-01A	0.522095	0.198741	0.0597088	0	0.00202599	0.00273066	0.00204021	0.0207113	0	0.0833118	0	0.0151356	0.0258771	0.0276371	0.0017681	0	0	0	0	0.0382166	0	0
TCGA-61-2003-01A	0.326134	0.170909	0.0531174	0.0313656	0.0376237	0	0	0.0747908	0	0.127893	0	0.00633739	0.0243239	0	0	0.0358838	0.0900724	0	0.0215492	0	0	0
TCGA-13-1404-01A	0.11967	0.241457	0.0774842	0.019	0.00340111	0.0233558	0.0303716	0.0721717	0	0.105865	0	0.0108945	0.0891286	0.00381836	0	0.102971	0.0110861	0	0.0893256	0	0	0
TCGA-23-1027-01A	0.411564	0.184495	0.06192	0	0	0.0469945	0	0.0101445	0	0.156893	0	0.0175675	0.0346082	0	0	0.0259615	0.00232478	0	0	0.04677	0	0.000756992
TCGA-23-1022-01A	0.239315	0.199805	0.0044885	0	0	0.0654588	0	0.0162663	0	0.133252	0	0	0.0945152	0	0	0.079471	0.00523914	0	0.162189	0	0	0
TCGA-61-2088-01A	0.272206	0.0160745	0	0.0233776	0	0.0477292	0.00358184	0.0135601	0	0.119344	0	0.132386	0.0208416	0	0	0.0788492	0.00631474	0	0.256191	0	0	0.00954312
TCGA-13-1507-01A	0.11292	0.128029	0.135764	0.0255348	0.0162191	0	0.0431556	0.11531	0	0.120772	0.155778	0.0562373	0	0	0	0.0600203	0.00654373	0	0	0.00954488	0.00814054	0.00603104
TCGA-61-1725-01A	0.0499099	0.231855	0.152256	0.0591108	0.0393095	0	0.00899554	0.103422	0	0.210954	0.00300203	0.0909489	0.00562045	0	0	0.0168879	0	0	0.00584122	0	0	0.0218864
TCGA-31-1944-01A	0.153885	0.12472	0.0774561	0.074066	0.018921	0	0.0141772	0.0774225	0	0.266242	0.0668895	0.0431167	0.0162342	0	0.0160318	0	0.0196031	0	0.0140527	0	0.00443599	0.0127462
TCGA-61-2092-01A	0.204469	0.151236	0.00492078	0.00739179	0.189623	0	0.193186	0.00828399	0	0.171302	0	0	0.0299766	0	0.00478911	0.0148721	0	0.0199492	0	0	0	0
TCGA-29-1710-01A	0.091179	0.196516	0.0552817	0.00717651	0.0254691	0.00693904	0.0195171	0.0598687	0	0.182398	0	0.0497473	0.0992363	0	0	0.0935612	0.0662848	0	0.0468251	0	0	0
TCGA-36-1571-01A	0.0574989	0.199309	0.0525412	0.0537387	0.0199169	0.0428587	0	0	0	0.297301	0	0.0789507	0	0	0	0.0940002	0	0.0522929	0.0515922	0	0	0
TCGA-23-1118-01A	0.169194	0.140587	0.162335	0.00195285	0	0.0617181	0	0.033065	0	0.188383	0	0.0269006	0.010156	0.0215112	0	0.0385494	0.00594493	0.120887	0.0188157	0	0	0
TCGA-29-1694-01A	0.122081	0.0810524	0.0543121	0.0599737	0.0822072	0	0.0178538	0.0203758	0	0.266146	0	0.00796135	0.0226001	0	0	0.0676639	0.0347894	0.0962539	0.0662442	0	0	0.000485501
TCGA-25-1318-01A	0.334025	0.257527	0.00279306	0	0	0.0241233	0.00410046	0	0	0.119964	0	0.0372421	0.0222003	0.0363549	0	0.0639662	0	0	0	0.0828736	0.0148295	0
TCGA-25-1870-01A	0	0.348364	0.0101119	0.0998563	0.039545	0	0	0.0112997	0	0.0826949	0	0.044156	0.0162613	0	0	0.100282	0	0.00578262	0	0.241646	0	0
TCGA-23-1028-01A	0.15029	0.0190475	0.176033	0.0116728	0.115989	0	0.0210006	0.0106017	0	0.209866	0	0.0183528	0.0765564	0	0	0.125597	0	0.0649927	0	0	0	0
TCGA-24-1469-01A	0.366743	0.138298	0.0870232	0	0.0389341	0	0.0189925	0.0148282	0	0.150308	0	0.0655524	0.0720612	0	0	0.04726	0	0	0	0	0	0
TCGA-29-1705-01A	0.360199	0.224236	0.0570468	0	0.0296717	0	0	0.0208251	0	0.225382	0	0.0153166	0.0367279	0	0.00733065	0.00208749	0	0	0	0.016439	0	0.00473694
TCGA-13-1410-01A	0.130497	0.140582	0.139093	0.0216417	0.0654197	0	0.0126204	0.0401131	0	0.207187	0	0.0574575	0.0518439	0	0.0243534	0.000981588	0	0.0879736	0	0.0202364	0	0
TCGA-24-1426-01A	0.0897498	0.26118	0.0175624	0.0322677	0	0.0747547	0	0	0	0.165084	0	0.00100034	0.0705145	0	0	0.036849	0	0.0228392	0.226812	0	0	0.00138611
TCGA-20-1687-01A	0.0453237	0.13193	0.109532	0.124228	0.103841	0	0.0114327	0.0761205	0	0.240177	0	0.0516214	0.05278	0	0	0.0287854	0.0170048	0.00503835	0.00218478	0	0	0
TCGA-13-0884-01B	0.073297	0.0580152	0.0933311	0.00262523	0.0409363	0	0.0129549	0.202979	0	0.123763	0.00358126	0.0809468	0.133676	0	0	0.103226	0	0.0246189	0.0460492	0	0	0
TCGA-13-1489-01A	0.126645	0.0743951	0.0694266	0.107132	0	0.0992092	0	0.0147847	0	0.248354	0	0	0.044736	0	0	0.11367	0	0.101647	0	0	0	0
TCGA-29-1697-01A	0.118774	0.155316	0.0472461	0.0179151	0	0.0266793	0	0.145716	0	0	0	0.0897167	0.0212842	0	0.0187353	0.0401055	0	0.23737	0.0811405	0	0	0
TCGA-04-1362-01A	0	0.178605	0.0197324	0.164802	0.012772	0	0	0.0145107	0	0.256415	0	0.00522416	0.0117142	0	0	0.10921	0	0.204709	0	0.0223058	0	0
TCGA-29-1688-01A	0.142581	0.22288	0.124758	0.0316502	0.0405463	0	0.00104251	0.0573127	0	0.225088	0	0.0227571	0.0448124	0	0.0378875	0.0227618	0	0	0.0198643	0	0	0.00605828
TCGA-25-1313-01A	0	0.368331	0.0856181	0.0962474	0	0.048416	0.00288655	0.01874	0	0.196204	0	0.0344823	0	0	0	0.0542965	0	0.0687093	0.00707675	0	0	0.0189921
TCGA-24-1616-01A	0.149994	0.130896	0.0923377	0.0224424	0.0594778	0	0	0.00595465	0	0.286069	0	0	0.0224376	0	0	0.125851	0	0.0671485	0.0373915	0	0	0
TCGA-24-2281-01A	0.363622	0.133534	0.0484725	0	0.00889831	0.0107075	0.00333352	0.0914108	0	0.0688985	0	0.0463546	0.110192	0	0	0.0980869	0	0	0.0164904	0	0	0
TCGA-61-1736-01B	0.0404215	0.189333	0.0168369	0.15099	0.0481066	0	0.00425958	0.0490095	0	0.24512	0	0.0169825	0.0240396	0	0	0.13699	0	0.077456	0.000453832	0	0	0
TCGA-29-1774-01A	0.326985	0.279596	0	0.0575833	0.0722216	0	0	0.152997	0	0.0544466	0	0	0.0186421	0	0	0.0297116	0	0	0.00781666	0	0	0
TCGA-25-1326-01A	0.138083	0.258254	0.0874709	0.0377937	0.0011014	0.0160287	0.0255621	0.0954471	0	0.178538	0	0.00967169	0.0551014	0	0	0.0648419	0	0	0.0124223	0	0	0.0196835
TCGA-13-0726-01A	0.0416987	0.183329	0.0688185	0.00242947	0	0.0408235	0	0.030728	0	0.304967	0	0	0.0765956	0	0.0169689	0.11575	0	0.0778087	0.035936	0	0	0.00414638
TCGA-10-0937-01A	0.117485	0.192021	0.0365757	0.0352044	0.0113974	0.00223227	0	0.133061	0	0.210674	0.00802499	0.0568118	0.0887397	0	0	0.0721813	0	0.0160359	0	0.0195567	0	0
TCGA-24-2023-01A	0	0.250386	0.105141	0.00995883	0.0305887	0	0.00112182	0.0908853	0	0.21769	0	0.0424066	0.041843	0	0.0140141	0.0891334	0	0.0861612	0.00402242	0	0	0.016647
TCGA-25-1320-01A	0.249462	0.166039	0.0391423	0.00716008	0.0614396	0	0.0109723	0.0516478	0	0.166284	0	0.0100781	0.0405583	0	0	0.0530127	0.0681354	0.0218321	0	0.0449649	0	0.00927156
TCGA-13-1489-02A	0	0.105428	0.14563	0.00639229	0.0403447	0	0.00285195	0.14859	0	0.103658	0	0.0711036	0.00592387	0	0	0.0783886	0.00728318	0.0987108	0	0.184233	0	0.00146063
TCGA-13-1498-01A	0.264771	0.058456	0.104571	0.0196409	0	0.0795334	0	0.0382177	0	0.181803	0	0.0769091	0.019957	0	0	0.129778	0.0152723	0	0.0110909	0	0	0
TCGA-13-0725-01A	0.0994763	0.28545	0.0390822	0.0325318	0.144351	0	0.100714	0.0331058	0	0.0707155	0	0.0412537	0.0354053	0.0103303	0	0.00718996	0	0.0595938	0.0330985	0	0	0.00770143
TCGA-23-1119-01A	0	0.209759	0.0988434	0.0530514	0.0254317	0.0225296	0.0367151	0.0778345	0	0.284224	0.0512316	0.0474964	0.0486359	0	0	0.0410404	0	0	0.00320691	0	0	0
TCGA-25-1315-01A	0.185129	0.126487	0.0462248	0.0157733	3.66e-05	0	0.00344477	0	0	0.186184	0	0.0192515	0.0177354	0	0	0.0403757	0	0.0430118	0.303971	0	0.00106722	0.0113086
TCGA-23-1123-01A	0.123648	0.232527	0.121002	0.0367749	0.00851401	0.0215703	0.0076026	0.14266	0	0.154312	0.00570105	0.0604972	0.0329774	0	0.0353807	0	0	0.00499664	0.0118355	0	0	0
TCGA-24-1551-01A	0.303075	0.102615	0.0945226	0.0338325	0	0.0174625	0.00585935	0.0834526	0	0.182115	0	0.0161296	0.0671599	0	0.00534141	0.0617616	0.0102333	0	0	0.0111419	0	0.00529889
TCGA-61-1737-01A	0.270426	0.224506	0.077658	0	0.0410256	0	0	0.032041	0	0.180589	0	0.0159367	0.0406338	0	0	0.027911	0.0428475	0.00277231	0	0.0436531	0	0
TCGA-25-1317-01A	0.294438	0.164934	0.0552743	0.0622621	0.0209313	0.0404814	0.163528	0.0565664	0	0.0284261	0	0.0446383	0.000723982	0.0175754	0	0	0	0	0.0502207	0	0	0
TCGA-30-1892-01A	0.333559	0.172532	0.0427674	0.000913167	0.0537002	0	0	0.0816557	0	0.200251	0.00525669	0.0263226	0.00990022	0	0.0343696	0	0	0	0	0.0308535	0	0.00791932
TCGA-25-1329-01A	0.294911	0.270074	0.0271963	0.0105535	0.0338942	0.00687363	0	0.0844833	0	0.176268	0	0.0263618	0.0309109	0	0.0241245	0	0	0.00764045	0	0.00442172	0	0.00228669
TCGA-10-0928-01A	0.187903	0.116771	0	0.00330723	0.01871	0.0617698	0	0	0	0.239032	0	0	0	0	0	0.0846194	0.129318	0.133062	0	0.0255082	0	0
TCGA-61-2000-01A	0.115622	0.0909416	0.0404268	0.08135	0.0496642	0	0	0.0365609	0	0.303715	0.0268087	0.0314784	0.00384065	0	0	0.131828	0.035246	0.0344723	0	0.0116232	0	0.00642308
TCGA-29-1781-01A	0.1722	0.224992	0.0910608	0.000755126	0	0.0172701	0.124638	0.217656	0	0.0398855	0.0636941	0.0317864	0.0143409	0	0	0	0	0	0	0.00172047	0	0
TCGA-61-2002-01A	0.101146	0.113539	0.104015	0.0296145	0.0158188	0.00989026	0	0.143729	0	0.126367	0.00415977	0.0230272	0.108444	0	0	0.120217	0.0238924	0	0.0634768	0	0	0.0126633
TCGA-61-2098-01A	0.545266	0.0295779	0.0223677	0.00227554	0.105797	0	0	0.0705358	0	0	0	0.0240255	0.091218	0	0	0.106472	0	0	0	0.00246436	0	0
TCGA-31-1956-01A	0.215218	0.233347	0.0456235	0	0.0225677	0	0.015838	0.118399	0	0.123611	0.029704	0.0264066	0.0417255	0	0	0.0572699	0.0223254	0	0.0341742	0	0	0.0137905
TCGA-24-1549-01A	0.201395	0.0600453	0.103451	0.0271574	0.0389687	0	0.00388309	0.174478	0	0	0.132127	0.0104967	0.0247274	0	0.0510039	0.097437	0.00905822	0	0.0657718	0	0	0
TCGA-24-2038-01A	0.112012	0.182645	0.00581607	0.204576	0.00453109	0.0580377	0	0.0308618	0	0.180043	0	0	0.0285946	0	0	0.111338	0	0.0182054	0	0.0633395	0	0
TCGA-24-1427-01A	0.0339083	0.15646	0.0571412	0.119401	0.100446	0	0.0390912	0.173536	0	0.181123	0.0214263	0.0230405	0.0793768	0	0.0057056	0	0	0.00359838	0	0.00366512	0	0.0020807
TCGA-25-1628-01A	0.0485397	0.156666	0.162664	0.014286	0.061553	0	0	0.295886	0	0.047475	0.0455503	0.0491732	0.05893	0	0.0132252	0	0.0106273	0	0.0354239	0	0	0
TCGA-29-1693-01A	0.137885	0.161916	0.110553	0.0348809	0	0.015556	0	0.0487505	0	0.14405	0	0.0327937	0.0152504	0.014471	0	0.047338	0	0.186421	0.043648	0	0	0.00648797
TCGA-24-2035-01A	0	0.326519	0.0906855	0.0562135	0.0862004	0	0.0169422	0.044745	0	0.196594	0.00883654	0.0447673	0.0271184	0	0	0.0220918	0.0245659	0	0.0307496	0	0	0.023971
TCGA-24-1845-01A	0.279388	0.131686	0.125661	0.0475239	0	0.0762876	0	0	0	0.148081	0	0.0289208	0.00104324	0	0.021196	0.00820539	0	0.0793686	0	0.0427626	0	0.00987662
TCGA-24-1842-01A	0.233748	0.11168	0.0626968	0	0.0496318	0	0.00645933	0.187088	0	0.108524	0	0.0450624	0.0683092	0	0	0.0917301	0.00159026	0	0.0314815	0	0	0.00199862
TCGA-24-2288-01A	0.0179737	0.111068	0.0991099	0.0143494	0.0972342	0	0.100831	0.181785	0	0.248055	0	0.0612596	0.0382704	0	0	0.0240356	0	0.00276882	0.000259336	0.00161061	0	0.00138963
TCGA-13-1403-01A	0.0350278	0.0477979	0	0	0	0	0.0002886	0	0	0.208419	0	0.0681071	0.0403584	0.077839	0	0.109496	0	0.372915	0.0385029	0	0.00103676	0.000211758
TCGA-61-1914-01A	0.0948251	0.238465	0.169734	0.0696679	0.0358014	0	0.0426176	0.0217386	0	0.0830931	0	0.0651569	0	0.0611084	0	0.0514542	0	0.0123985	0	0.0223008	0.0260839	0.00555371
TCGA-23-1809-01A	0.553713	0.0739299	0.0681408	0.00282904	0.0831275	0	0.00552286	0.00740778	0	0.100898	0	0.0342623	0.0332926	0	0	0.0236515	0	0	0	0.0132248	0	0
TCGA-24-0966-01A	0	0.30375	0.0283109	0.0498877	0	0.0370509	0	0.157684	0	0.101482	0	0.0193561	0.0875856	0	0	0.081223	0	0.130531	0	0.00313859	0	0
TCGA-04-1365-01A	0.196907	0.138505	0.143153	0.0346967	0	0.0066505	0.00396455	0.144546	0	0.139053	0.00859084	0.0722248	0.0332872	0	0	0.0383647	0.00643799	0	0	0.0336179	0	0
TCGA-29-1690-01A	0.164674	0.239991	0.000932654	0.146796	0.0179283	0	0.000141366	0.039285	0	0.181361	0.0164416	0	0.0344623	0	0	0.00620214	0.0506451	0.0690211	0.0254495	0	0	0.00666928
TCGA-29-1711-01A	0.0959967	0.163558	0.154596	0.00645713	0.06288	0	0	0.187926	0	0.120918	0.0367357	0.0440647	0.0766992	0	0.0172493	0.0186484	0.00509923	0	0.00917134	0	0	0
TCGA-09-2056-01B	0.0778023	0.156607	0.0574152	0.0572401	0.0115748	0.00612892	0	0.112924	0	0.163416	0	0.0280698	0.0435108	0	0	0.0626395	0.0439436	0.0252245	0	0.135001	0	0.018503
TCGA-25-1626-01A	0.0485823	0.132433	0.0264355	0.103604	0.0739979	0	0.0191816	0.143216	0	0.131877	0	0.0349801	0.0486057	0	0	0.0476769	0.0105281	0.0213743	0	0.152518	0	0.00499029
TCGA-13-0800-01A	0.130791	0.053739	0	0.104182	0	0.00980904	0.0147833	0	0	0.096537	0	0.0764729	0.0486215	0	0	0.0818529	0	0.139455	0.243757	0	0	0
TCGA-04-1361-01A	0	0.193425	0.0293762	0.0478383	0.00869291	0.00827668	0	0.100161	0	0.28335	0	0.0615778	0.0210309	0	0	0.0765182	0	0.126404	0.0433486	0	0	0
TCGA-13-1497-01A	0.18256	0.0852358	0.123187	0.0107164	0.0253804	0.0245718	0.100785	0.0993321	0	0.17964	0	0.0581337	0.0716716	0	0	0.0276272	0	0.009324	0.00183449	0	0	0
TCGA-24-1103-01A	0.167169	0	0.0806016	0.0357007	0.00527373	0.0193951	0	0.04442	0	0.183613	0	0.147506	0.00136656	0.00631224	0	0.0985316	0	0.157991	0.0439214	0	0.00673917	0.00145965
TCGA-24-1546-01A	0.271749	0.163176	0.0527423	0.0435671	0	0.0672989	0.0189414	0.0140456	0	0.144424	0	0.00869425	0.0324475	0	0.000286968	0.00496792	0.132624	0	0.00780213	0.0244476	0	0.0127863
TCGA-13-0891-01A	0.257995	0.230638	0.0700066	0	0	0.0249361	0	0.0762347	0	0	0	0.0308743	0.102981	0	0.0333271	0.0665214	0	0.0612426	0.0452426	0	0	0
TCGA-09-2053-01C	0.218431	0.168789	0.0884091	0	0.0558648	0	0.083079	0.0789432	0	0.128136	0.00161491	0.0629908	0.0582451	0	0	0.0554977	0	0	0	0	0	0
TCGA-24-2261-01A	0.00661632	0.1782	0.0934587	0.0808196	0.0419296	0	0.000641116	0.192779	0	0.175518	0.022073	0.105098	0.0825868	0	0	0.0165165	0.00201412	0	0.00174985	0	0	0
TCGA-61-1900-01A	0.0963711	0.185338	0.065336	0.0207959	0.122141	0	0	0.0806507	0	0.170356	0	0.0857203	0.0291396	0	0	0.143284	0	0	0	0.000867377	0	0
TCGA-29-1783-01A	0.158756	0.230771	0.0715062	0.023114	0.0245726	0	0.0911989	0.087443	0	0.098916	0	0.0421419	0.0462742	0	0	0.0521031	0.0301321	0	0.0227356	0	0	0.0203353
TCGA-23-1122-01A	0.11082	0.167333	0.084439	0.0689525	0.0479072	0	0	0.0123073	0	0.199429	0	0.0637188	0	0	0	0.075272	0.0714382	0.0983832	0	0	0	0
TCGA-30-1866-01A	0.122966	0.150933	0.08016	0.0116089	0	0.0555167	0	0.3751	0	0	0	0.0323333	0.0953285	0	0	0.064525	0	0	0	0.0115286	0	0
TCGA-13-0883-01A	0.419554	0.198002	0.0401798	0	0.0472156	0	0	0.103841	0	0.0873909	0	0	0.0599091	0	0.00248926	0	0.00033901	0	0	0.0305256	0	0.0105533
TCGA-13-1487-01A	0.191621	0.123601	0.0956013	0	0.0705871	0	0	0.104159	0	0.173263	0	0.0580221	0.0300542	0	0	0.092782	0.0173804	0.0240309	0.0188983	0	0	0
TCGA-24-1604-01A	0.0084971	0.111675	0.0519244	0.14255	0	0.0934112	0	0.0400155	0	0.132352	0	0.052031	0.0523638	0	0	0.0902016	0	0.18723	0.0368082	0	0	0.00093935
TCGA-13-1501-01A	0.205324	0.120536	0.0574782	0.0212331	0.118396	0	0.0384571	0.057447	0	0.252094	0	0.0162964	0.063915	0	0	0.015853	0.00606777	0.014428	0.0124738	0	0	0
TCGA-09-1659-01B	0.358679	0.154606	0.0573162	0.0357374	0.0192949	0.00211391	0.00344456	0.0978987	0	0.106814	0	0.0158084	0.0413809	0	0	0.0626711	0	0.0352798	0.00895521	0	0	0
TCGA-29-1770-01A	0.262506	0.216665	0.0165798	0.0489478	0	0	0	0.0328929	0	0.0955533	0	0.0141453	0.0233643	0	0	0.0861581	0	0.109367	0	0.0833776	0.00874191	0.00170062
TCGA-24-1418-01A	0.0892417	0.14137	0.0859787	0.0605481	0.119706	0	0	0.0252275	0	0.334398	0	0.0276347	0.0390516	0	0.0114289	0	0	0.050265	0	0.00983113	0	0.00531904
TCGA-61-2109-01A	0.374695	0.198704	0.00764547	0	0.0464859	0.00981125	0	0	0	0.141857	0	0	0.0848595	0	0	0.0892533	0	0.0112583	0.0327464	0	0	0.00268421
TCGA-29-1696-01A	0.066989	0.19394	0.0991466	0.0280588	0	0.011285	0.00102623	0.0226983	0	0.139006	0	0.0704717	0.0586553	0	0	0.034565	0.0153522	0.106516	0.142596	0	0.00502866	0.00466488
TCGA-5X-AA5U-01A	0.700133	0	0.00372409	0	0.00351641	0	0	0	0	0.214061	0	0.0304448	0.0042502	0	0.0422796	0	0	0	0	0.00159103	0	0
TCGA-29-1703-01A	0.236609	0.200077	0.0257177	0.0237653	0	0.000903756	0	0.19239	0	0.0614862	0	0.0155224	0.0840204	0	0	0.0621053	0.0028933	0	0.0863197	0	0	0.00818973
TCGA-29-1762-01A	0.157223	0.299954	0.00489343	0.141872	0	0.0134273	0	0.0540967	0	0.17492	0	0	0.0180169	0	0	0	0.0262307	0	0.047869	0	0	0.0614958
TCGA-13-0730-01A	0.187819	0.236616	0.0175953	0	0.0219856	0	0	0.162289	0	0.0671746	0	0.0150547	0.0573694	0	0	0.0832936	0.0547676	0.0960351	0	0	0	0
TCGA-61-2008-01A	0.023615	0.231596	0.103228	0.0886684	0	0.0435036	0.0597822	0.124683	0	0.13775	0	0.0386918	0.0458476	0	0	0.0639619	0	0	0	0.038672	0	0
TCGA-20-1686-01A	0.071016	0.0976535	0.0295255	0.0403111	0.139193	0	0.11368	0.0245221	0	0.221682	0	0.0668078	0	0	0.00344069	0.0103723	0	0.149647	0.0321496	0	0	0
TCGA-13-0906-01A	0.073864	0.0309285	0.139756	0.00542908	0.0799615	0	0.0138305	0.0838777	0	0.216971	0	0.0894602	0.0597754	0	0	0.0644804	0	0.141665	0	0	0	0
TCGA-13-1483-01A	0.279243	0.11083	0.0270556	0.0295174	0.0156176	0.0231472	0	0.0457493	0	0.202393	0	0.0226018	0.053353	0	0	0.0135462	0	0.146558	0	0.0303883	0	0
TCGA-04-1357-01A	0.120521	0.132859	0.067462	0.00337748	0	0.0301024	0.0380947	0.229323	0	0.170618	0.0270687	0.0457029	0.0680804	0	0	0.0379402	0.0288495	0	0	0	0	0
TCGA-04-1331-01A	0.205224	0.106633	0.128244	0.00533092	0.131154	0	0.00400642	0.0512795	0	0.0934198	0	0.119848	0.00934871	0	0	0.0736875	0	0.0622763	0.00954887	0	0	0
TCGA-23-1109-01A	0.306505	0.147478	0.0353559	0.0103204	0.0756678	0	0.0166755	0.0680249	0	0.110293	0	0.0484745	0.0380125	0	0	0.0480357	0.0922898	0	0.00286777	0	0	0
TCGA-23-1111-01A	0.114219	0.0858953	0.00118788	0.0960059	0.099013	0	0.00534082	0.029923	0	0.209841	0	0.0407343	0.0251892	0	0	0.0550332	0	0.237617	0	0	0	0
TCGA-59-2350-01A	0.311373	0.11558	0.0968626	0.0071597	0	0.0706801	0	0.0811934	0	0.127422	0	0.0306269	0.0340027	0	0.029292	0	0	0.0909147	0.00489237	0	0	0
TCGA-24-2297-01A	0.201383	0.144693	0.0651523	0.071285	0.0128285	0.0246514	0	0	0	0.248056	0	0.0612395	0	0.0121882	0	0.0856916	0	0.0609713	0.0118594	0	0	0
TCGA-13-1509-01A	0.185826	0.136841	0.0928338	0.0339738	0.00445612	0.0186505	0.111425	0.110755	0	0.163189	0	0.0388274	0.0480966	0.00335284	0	0.0148063	0	0	0	0.0369668	0	0
TCGA-24-0968-01A	0.0312474	0.166893	0.0745947	0.120174	0.0615039	0	0	0.111253	0	0.223443	0	0.0641338	0.037018	0	0	0.0909039	0	0.015287	0	0.0035482	0	0
TCGA-09-2048-01A	0.0706472	0.31095	0.0471149	0.0182169	0.00536823	0.0442328	0	0.0178536	0	0.143841	0	0.0682163	0.096627	0.02067	0	0.0633247	0.0346356	0	0	0.0421209	0	0.016181
TCGA-29-1707-02A	0.41574	0.0779781	0.0337535	0	0.00564314	0.000591211	0	0.00037524	0	0	0	0.0341268	0.0674581	0.00879817	0.0398251	0	0	0.177619	0	0.127894	0	0.0101966
TCGA-09-0367-01A	0.175347	0.180663	0.0996331	0.0217476	0	0.0713075	0	0.0445029	0	0.125787	0	0.0414888	0.0338275	0	0	0.117875	0.0849668	0	0	0.00285378	0	0
TCGA-13-0924-01A	0.107734	0.109438	0.135061	0.0246542	0.0713107	0.0102092	0	0.13718	0	0.12243	0	0.087428	0.0743966	0	0	0.0650697	0.000891289	0	0	0.0533494	0	0.000848097
TCGA-24-1565-01A	0	0.313376	0.0226503	0.040156	0.014735	0	0	0.30027	0	0.0114192	0	0.0110916	0.149919	0	0	0.00935321	0.0163971	0	0.110632	0	0	0
TCGA-24-1467-01A	0.188416	0.225166	0.102284	0.0291539	0	7.46e-05	0	0.0924379	0	0.0268785	0	0.0527331	0.10453	0	0	0.00803923	0	0	0.170287	0	0	0
TCGA-24-1846-01A	0.407479	0.122545	0.0885776	0	0.0358696	0	0	0.0438949	0	0.115636	0	0.0120194	0.0810824	0	0	0.0659656	0	0	0.0269312	0	0	0
TCGA-30-1862-01A	0	0.137652	0.0873888	0.0924036	0.0567048	0	0.0516667	0.128032	0	0.262151	0	0.0314017	0.0546726	0	0	0.0558131	0	0	0	0.0421137	0	0
TCGA-24-2298-01A	0.209921	0.0967999	0.078234	0.00428619	0.0845823	0	0.0343949	0.0604013	0	0.16909	0	0.049647	0.000109513	0	0.0112184	0.0212058	0	0.12986	0	0.035931	0	0.0143185
TCGA-13-0901-01B	0.0156836	0.11713	0.0148977	0.109865	0.190149	0	0	0.0306617	0	0.196168	0	0.0298157	0.00733216	0.0264784	0	0.0118316	0	0.234082	0	0.0159052	0	0
TCGA-23-1021-01B	0.0795937	0.102452	0.00418534	0.0492257	0.0592218	0.121965	0	0.0896168	0	0.189064	0	0.0781375	0.030173	0	0	0.0707195	0	0.122199	0.00344667	0	0	0
TCGA-57-1584-01A	0	0.259461	0.052065	0.16727	0	0	0.00226202	0.0351248	0	0.263227	0	0.0124837	0.00742581	0	0	0.0468471	0	0.100342	0.0534919	0	0	0
TCGA-13-A5FT-01A	0.107344	0.0485073	0.0352423	0.00641902	0.143688	0	0.0603932	0.00751725	0	0.096624	0	0.0822904	0.0237384	0	0	0.0332776	0	0.334267	0.0206916	0	0	0
TCGA-59-2354-01A	0.210163	0.162627	0.0610628	0	0.108711	0	0.0239445	0.104309	0	0.120432	0	0.0401021	0.0676553	0	0	0.0663492	0	0	0.0346447	0	0	0
TCGA-24-2280-01A	0.132838	0.21611	0.013646	0.0254969	0.18809	0	0.189472	0.0807318	0	0.0893275	0	0.0185949	0.0413665	0	0	0.00293993	0	0	0.00138619	0	0	0
TCGA-25-1321-01A	0.0653298	0.322061	0.0714817	0.04087	0	0.0757355	0	0.0182155	0	0.105252	0	0.0645489	0.0227161	0	0	0.0608196	0.0400304	0.00201792	0	0.0917782	0	0.0191437
TCGA-13-0768-01A	0.0453861	0.114488	0.0894088	0.0308048	0.0382992	0	0.089165	0.269472	0	0.100909	0.100958	0.0284267	0.0651185	0	0	0.0120542	0.00549367	0	0.00657251	0	0	0.00344377
TCGA-13-0893-01B	0.0702835	0.130092	0.126921	0	0.0432472	0	0	0.115979	0	0.125367	0.0619092	0.0269053	0.100915	0.00526934	0.0489412	0.0283127	0	0.0641837	0.0516749	0	0	0
TCGA-36-1570-01A	0.117135	0.221497	0.120828	0.084928	0	0.0328352	0.0044814	0.0446017	0	0.0807953	0	0.0383274	0.0517067	0	0	0.05376	0.000401929	0.00318615	0.113329	0	0.0321869	0
TCGA-61-1910-01A	0.298937	0.242464	0.115512	0	0	0.0347914	0	0.00983829	0	0.0326127	0	0.00810834	0.0488915	0	0	0.0481993	0	0.0478433	0	0.0897066	0	0.0230958
TCGA-23-1029-01B	0.105696	0.118046	0.0769179	0.117017	0.0923158	0	0	0.0336506	0	0.0850413	0	0.0148402	0.00411035	0	0	0.100762	0	0.21343	0.0337035	0	0	0.00446961
TCGA-36-1580-01A	0.254661	0.160263	0.0732512	0.0196731	0.0169286	0	0	0.100893	0	0.223991	0	0.00215932	0.0790064	0	0	0.0267144	0.029074	0	0.0131809	0	0	0.000204261
TCGA-59-2348-01A	0.259099	0.153657	0.101562	0.00116075	0.0722333	0	0.129041	0.0128006	0	0.0949879	0	0.0908862	0.001639	0.00887626	0	0.0395554	0	0	0.0206811	0	0	0.0138193
TCGA-13-1495-01A	0.0572089	0.087449	0.233242	0.0290733	0	0.0610485	0	0.05392	0	0.26953	0	0.0580713	0	0.0318276	0	0.0662952	0	0	0.0523342	0	0	0
TCGA-13-0720-01A	0.16844	0.0223628	0.00617962	0	0.133403	0	0.083802	0.0226448	0	0.134601	0	0.129119	0.0193006	0.00689919	0	0.0525311	0	0.219026	0	0.00169122	0	0
TCGA-25-1630-01A	0.394841	0.186612	0.0565214	0	0	0.023847	0	0.000214623	0	0.0959866	0	0	0.0326423	0	0	0.0251087	0.0513839	0	0	0.0463833	0	0.086459
TCGA-61-1919-01A	0.386526	0.19088	0.100817	0	0.016716	0.0137052	0.0129462	0.0344736	0	0.109603	0	0.0190651	0.0369342	0.0100099	0	0.0291749	0.0331949	0	0.00487836	0	0	0.0010756
TCGA-13-1496-01A	0.0178128	0.119867	0.113628	0	0	0.168497	0.0146701	0.0901535	0	0.137559	0.0225255	0.0604774	0.0343242	0.049552	0	0.033596	0	0.0928667	0.0215932	0	0	0.0228773
TCGA-29-1763-01A	0.191732	0.303379	0.063179	0.0263043	0.0811027	0	0	0.0100777	0	0.216074	7.11e-05	0.00345725	0.0154021	0	0.0268389	0.0106599	0	0.0432203	0.00191988	0	0	0.00658159
TCGA-24-1104-01A	0.017063	0.162944	0.066286	0.0589615	0	0.043715	0.000197641	0.108166	0	0.268785	0	0.063228	0.0891754	0	0	0.0773198	0	0	0	0.0441594	0	0
TCGA-61-1907-01A	0.144063	0.180106	0.0592115	0.0209526	0.0291449	0	0.0299497	0.130476	0	0.234314	0.00193004	0.0191354	0.0846545	0	0	0.00779836	0	0.0385941	0	0.0171165	0	0.00255467
TCGA-13-0766-01A	0.148848	0.160176	0.0337821	0.0673623	0.0265904	0.0347908	0	0.0686589	0	0.0728498	0	0.0567982	0.00986468	0	0	0.065749	0	0.229615	0.0249138	0	0	0
TCGA-24-2027-01A	0.122781	0.195292	0.0823501	0.0200891	0.158526	0	0.011278	0.0444653	0	0.0892124	0	0.12534	0	0	0	0.082064	0	0.0451406	0.0234606	0	0	0
TCGA-24-2024-01A	0.220577	0.221429	0.0868461	0.0114183	0.0635964	0.0298257	0	0.00341859	0	0.139593	0	0.0697708	0.00791677	0	0	0.0355565	0	0	0	0.092693	0	0.0173584
TCGA-31-1951-01A	0.223286	0.139091	0.141651	0.0106239	0.0293055	0	0.000662803	0.0798781	0	0.164931	0.0178632	0.0329469	0.066711	0	0.06639	0.00290527	0	0.0237533	0	0	0	0
TCGA-04-1530-01A	0.220396	0.214441	0.0922444	0.00372752	0.0143292	0.00270849	0	0.0321827	0	0.264077	0.0140761	0.0501158	0	0	0	0.0667201	0	0	0	0.0249813	0	0
TCGA-24-1419-01A	0.186077	0.298448	0	0.12967	0.0189231	0.0296441	0	0	0	0.0426528	0	0.0958036	0.054356	0	0.0248199	0.00167824	0	0.0849139	0	0.0330133	0	0
TCGA-29-1701-01A	0.0715494	0.232216	0.120933	0.0630463	0.0338142	0	0	0.193827	0	0.0989825	0.0696027	0.0568712	0.0214799	0.0129344	0	0	0	0.00716354	0	0.0175804	0	0
TCGA-23-1026-01B	0.125509	0.154448	0.113102	0.0141311	0.00209807	0	0.0025118	0.117763	0	0.221195	0.0249863	0.00569451	0.00857527	0	0	0.162262	0.00707468	0	0.0406499	0	0	0
TCGA-04-1332-01A	0.0660733	0.291096	0.058533	0.0621232	0.0254066	0.0137637	0	0.0417424	0	0.239737	0	0.0257033	0	0	0	0.0505467	0.0135617	0.000454502	0.0589573	0.0462608	0	0.00604026
TCGA-23-1113-01A	0.198699	0.28793	0.00577673	0.0116717	0	0.0510213	0	0	0	0.127899	0	0.0228246	0	0	0.0432318	0	0.0349637	0	0.215981	0	0	0
TCGA-29-A5NZ-01A	0.421475	0.0196116	0.042261	0	0	0.0734222	0.0139426	0.0380364	0	0.260758	0	0.0236536	0.00103598	0	0	0.036948	0.0385258	0.00331767	0.0123456	0	0.0146673	0
TCGA-20-1682-01A	0.0868881	0.116915	0.0760484	0.0667934	0.0815293	0	5.62e-05	0.180529	0	0.230263	0.109395	0.0296566	0.0177427	0	0	0	0.00370712	0.000476401	0	0	0	0
TCGA-23-1107-01A	0.233267	0.225731	0.0602456	0.0201921	0	0.0788099	0.0375975	0.0696838	0	0.0894368	0	0.0317963	0.0504304	0	0	0.0596865	0	0	0	0.0429764	0.000147139	0
TCGA-20-1683-01A	0.16134	0.116781	0.0254672	0	0.0517509	0	0.305751	0.0891041	0	0.112945	0.00748406	0.0377933	0.0415526	0	0	0.00949456	0	0.0221284	0.018244	0	0	0.000162759
TCGA-59-2352-01A	0.280587	0.0745894	0.1019	0	0	0.049075	0.0953779	0.0681252	0	0.0743711	0	0.0393843	0.063246	0	0	0.0887831	0	0.0395038	0.0250582	0	0	0
TCGA-24-2262-01A	0.229853	0.0811892	0.144507	0.00336569	0.0400492	0	0.0139798	0.10244	0	0.133511	0	0.0675361	0.0728743	0	0.0352279	0	0.0088348	0	0	0.0552562	0	0.0113751
TCGA-23-1114-01B	0.429328	0.0858356	0	0.00557342	0.0694612	0	0	0	0	0.174754	0	0.0137321	0.0222733	0	0	0.0247604	0	0.163073	0	0.0112088	0	0
TCGA-24-1431-01A	0	0.297039	0.0927396	0.129131	0.0256587	0.016759	0	0.0816911	0	0.250269	0	0.0319465	0.0338713	0	0	0.0305421	0	0	0	0.00708766	0	0.00326506
TCGA-23-2084-01A	0	0.187718	0.060025	0.154006	0	0.0188991	0	0.0432466	0	0.276476	0	0.0624555	0.000317016	0	0	0.0463509	0	0.141507	0.00185119	0	0	0.00714865
TCGA-04-1536-01A	0.0640599	0.152832	0.0375438	0.193813	0.0463195	0.00190011	0	0.0315026	0	0.203841	0	0.0209328	0.00809864	0	0	0.062888	0	0.0857574	0	0.0905113	0	0
TCGA-04-1519-01A	0.186729	0.1275	0.0327834	0.0252158	0	0.0657233	0	0.0419879	0	0.147432	0	0.0054705	0.0458349	0	0	0.0725969	0	0	0.248726	0	0	0
TCGA-24-1560-01A	0.140808	0.168401	0.0780519	0.0113951	0.0545151	0	0	0.0593896	0	0.188784	0	0.151212	0	0	0	0.0427525	0	0.104691	0	0	0	0
TCGA-59-2351-01A	0.202577	0.25904	0.0515507	0	0	0.0386398	0.0931476	0.0571739	0	0.196053	0.00282015	0.0157848	0.0646144	0	0.00135482	0.0125842	0	0	0	0.00466003	0	0
TCGA-31-1953-01A	0.248542	0.188115	0.0696103	0.025926	0.00722267	0	0	0.0374615	0	0.126681	0.00130261	0.0168147	0.0827406	0	0.0146031	0.0774416	0.075285	0	0.0236394	0	0	0.00461381
TCGA-24-1474-01A	0	0.391652	0.0476827	0.0645203	0	0.0318501	0	0.0663566	0	0.190293	0	0.0235841	0.00322154	0	0	0.0359516	0	0.00179011	0.127948	0	0	0.0151495
TCGA-25-1623-01A	0.140105	0.146819	0.0811956	0.0467561	0.0526992	0	0.00686766	0.0977835	0	0.214561	0	0.0611064	0.0825858	0	0	0.0401932	0	0	0.0173039	0	0	0.012024
TCGA-13-0897-01A	0.071513	0.183635	0.151465	0	0	0.0264463	0.00162434	0.0956921	0	0.190422	0	0.0841602	0.0928071	0	0	0.0533015	0.00152235	0.0281905	0.0192206	0	0	0
TCGA-24-1930-01A	0.127951	0.247431	0.0756233	0.0243113	0.0947957	0	0.110226	0.0629664	0	0.166777	0.000139608	0.040366	0.0364864	0	0.00604706	0.00213783	0	0	0	0	0	0.00474216
TCGA-10-0931-01A	0.0985184	0.138893	0.02979	0.0634113	0.0368183	0.0771443	0	0.0545786	0	0.211506	0.00379452	0.0623084	0.00559851	0	0.036334	0.0125771	0	0.074627	0	0.0941013	0	0
TCGA-13-0765-01A	0.410742	0.0661955	0.00584765	0.0669818	0.038493	0	0	0.0604429	0	0.161072	0	0.0250564	0.0773385	0	0	0.0403795	0	0.00760936	0	0.0398416	0	0
TCGA-04-1651-01A	0	0.078471	0.0747139	0.0729384	0.0796312	0	0	0.0228324	0	0.293772	0	0.0918191	0	0	0	0.0796479	0	0.177215	0.0289593	0	0	0
TCGA-25-2396-01A	0.0297827	0.174117	0.117971	0.0285233	0.0396411	0.00389253	0	0.102862	0	0.231108	0	0.0503936	0.0803266	0	0	0.105369	0	0	0.0193294	0	0	0.0166844
TCGA-36-1577-01A	0.472873	0.00864733	0.00287457	0.0162768	0.044607	0	0.00278051	0.140307	0.0432316	0	0	0.00373546	0.0325138	0	0	0.158533	0	0	0.0318144	0	0.00150371	0.0403014
TCGA-30-1857-01A	0.279134	0.137319	0.0878003	0.015421	0	0.0380618	0	0.0908898	0	0.18751	0	0.00989997	0.079189	0	0	0.0310236	0.0127445	0	0.0310061	0	0	0
TCGA-13-1409-01A	0.507144	0.0150211	0	0	0	0.0601823	0	0	0.043101	0.000328576	0	0.0448523	0.041357	0.0858109	0.0743133	0	0.00615428	0	0.121735	0	0	0
TCGA-04-1655-01A	0.171275	0	0	0	0	0.186605	0.0307069	0.0745357	0	0.0452116	0	0.0285322	0.0174084	0	0	0.113141	0	0	0.219055	0	0.113529	0
TCGA-59-2355-01A	0.0836109	0.126402	0.15536	0.018682	0.0540459	0	0.0077985	0.194092	0	0.130057	0	0.0557422	0.0782192	0	0	0.0574209	0	0.0278919	0.0106776	0	0	0
TCGA-61-1995-01A	0.119219	0.263181	0.0588722	0.0209373	0.00479918	0.010955	0	0.0663131	0	0.278627	0	0.0061153	0.0907777	0	0	0.0427013	0.00500306	0	0.0310031	0	0	0.00149699
TCGA-25-1322-01A	0.0722818	0.174775	0.0942187	0.155054	0.131123	0	0.00496497	0	0	0.137496	0	0.0533996	0.0148973	0	0	0.0450581	0	0.0963042	0	0.00945915	0	0.0109686
TCGA-13-0905-01B	0.301766	0.100574	0.103688	0.0015354	0.0157866	0.0196985	0	0.00561645	0	0.143128	0	0.0726191	0.0809805	0.0112171	0	0.00607376	0	0.0515133	0	0.0817883	0	0.00401463
TCGA-09-2051-01A	0.0583467	0.219454	0.0725812	0.0407291	0.0407546	0	0	0.0803353	0	0.109849	0	0.104736	0.0143236	0	0	0.0718876	0	0.132253	0.0544647	0	0	0.000285211
TCGA-13-0900-01B	0.0243063	0.160951	0.259666	0.00948777	0	0.0471621	0	0.0778544	0	0.177905	0.0592773	0.0692977	0	0	0	0.0111335	0.00433689	0.0178396	0.0807834	0	0	0
TCGA-61-1728-01A	0.432065	0.162766	0.0615829	0	0	0.00240306	5.13e-05	0	0	0.151871	0	0.0628325	0.0252904	0.0406731	0	0.0331191	0	0	0	0.0273454	0	0
TCGA-24-1544-01A	0.313807	0.085671	0.0221887	0.027417	0.107135	0	0.018698	0.287156	0	0	0.0185744	0.0516062	0	0	0	0.0285133	0	0.0366167	0	0	0	0.00261607
TCGA-04-1343-01A	0.0553284	0.148546	0.114949	0.016457	0.0172025	0.0902435	0.0159088	0.16764	0	0.100765	0	0.0418524	0.0803292	0	0	0.0695645	0	0	0	0.0806307	0	0.000583141
TCGA-24-2267-01A	0.170043	0.130399	0.151616	0.00391522	0.0355601	0	0.0537335	0.0840559	0	0.181224	0.0246649	0.0494288	0.0641902	0	0.0446931	0	0	0	0	0.00647624	0	0
TCGA-04-1648-01A	0.0950179	0.0852235	0.133729	0	0.0747521	0	0.00222867	0.0442448	0	0.146057	0.00102479	0.0284421	0.035641	0.140069	0	0	0.060536	0	0.151544	0	0	0.0014903
TCGA-59-2363-01A	0.13915	0.0915507	0.0509874	0.0566879	0.151194	0	0	0.0699709	0	0.0635848	0	0.123958	0.00587326	0	0	0.0693703	0	0.134168	0.00293398	0	0	0.0405708
TCGA-24-2290-01A	0.200283	0.251763	0.0823263	0.0684121	0.0217179	0.00629211	0	0.0237699	0	0.0831054	0	0.0266909	0.0568278	0	0.0296524	0	0	0.0704586	0	0.0672203	0	0.0114797
TCGA-13-1512-01A	0.338734	0.108005	0.146548	0	0	0.062551	0.00798802	0.0852752	0	0.0893607	0	0.0322869	0.0609769	0	0.0319858	0.00234083	0.0127275	0	0	0.0212202	0	0
TCGA-10-0938-01A	0.258741	0	0.0601521	0.00365772	0	0.172986	0	0.0381851	0	0.102183	0	0.154027	0.0480541	0.0391658	0	0.109844	0	0	0	0	0.0130046	0
TCGA-24-1417-01A	0.255089	0.155171	0.0566192	0.00579408	0.0734015	0	0.00678485	0.0282976	0	0.15186	0.00182339	0.0511589	0.0705363	0	0.0248869	0.0430283	0	0.0424361	0.0331133	0	0	0
TCGA-13-0913-02A	0.10953	0.0844816	0.146932	0.00620955	0.0257464	0.0512747	0.00330662	0.166838	0	0.0923786	0.0241887	0.0809197	0.0494161	0	0	0.0965457	0.0459296	0	0.0161495	0	0	0.000152585
TCGA-13-2060-01A	0.0329115	0.173662	0.106792	0.0633431	0.0431712	0	0.0567686	0.132196	0	0.214149	0.0263301	0.0704397	0.0120277	0	0	0.0107427	0	0.0503642	0.00710306	0	0	0
TCGA-31-1950-01A	0.0834249	0.13007	0.14101	0.0262352	0.0105264	0	0.074336	0.0363566	0	0.138334	0	0.0752805	0.0465912	0	0	0.0811322	0	0.0388814	0.117822	0	0	0
TCGA-13-1408-01A	0.219545	0.0935638	0.119072	0.0103716	0.0847629	0	0.0179849	0.0422106	0	0.271977	0	0.0583018	0.0510892	0	0.00730989	0.0157523	0	0	0	0.0080589	0	0
TCGA-61-2113-01A	0.164818	0.15178	0.0922049	0.011651	0.0427315	0	0.000211689	0.0250612	0	0.258812	0.00645185	0.0665398	0	0	0.0370545	0	0	0.0926143	0	0.033424	0	0.0166453
TCGA-24-0982-01A	0.198128	0.0726492	0.0719095	0.00571414	0.102397	0	0.0315841	0.0230284	0	0.320668	0	0.049163	0.0563195	0	0	0.0671067	0	0	0.00133204	0	0	0
TCGA-61-1738-01A	0.0359416	0.157829	0.0931712	0.0958742	0.0540673	0	0.0723591	0.0470161	0	0.0390164	0	0.100907	0	0	0	0.0431592	0	0.239301	0	0	0	0.0213566
TCGA-24-2020-01A	0.464385	0.202212	0.0919232	0.0233457	0	0.0162803	0	0.0770446	0	0.0210323	0.000518107	0.0284865	0.0329862	0	0.0417857	0	0	0	0	0	0	0
TCGA-61-1733-01A	0.0647095	0.293966	0.072789	0.0750981	0	0.0369274	0	0.139725	0	0.147436	0	0.0574248	0.055509	0	0.0111406	0	0	0	0	0.0425259	0	0.00274876
TCGA-24-1850-01A	0.0666316	0.266357	0.140802	0.00260537	0.0155709	0.0198486	0	0.157701	0	0.149252	0	0.0537858	0.0721585	0	0	0.0302451	0	0	0	0.0124871	0	0.0125555
TCGA-25-2392-01A	0	0.588396	0.0410637	0.0865514	0	0.0717731	0	0.0555065	0	0.109722	0.00503329	0.0044822	0.0329169	0	0	0.00107466	0.00041494	0	0	0.000624769	0.000370683	0.00206979
TCGA-24-1550-01A	0.279329	0.297785	0.0376148	0	0.101978	0	0.078001	0.0317397	0	0.0626111	0.0244323	0.0382571	0.0149866	0	0	0.00702185	0	0	0	0.0200186	0	0.00622519
TCGA-25-2393-01A	0.363962	0.107203	0.0569647	0.00924057	0.0965893	0	0.00274317	0.0829196	0	0.115618	0	0.0349278	0.0217236	0	0.0164016	0	0.00434411	0	0	0.0638265	0.000584996	0.0229515
TCGA-25-2404-01A	0.0928711	0.115031	0.169104	0.0926218	0.00930132	0.01426	0	0.100233	0	0.251401	0	0.0672893	0.0178176	0	0	0.0413378	0	0	0.0287333	0	0	0
TCGA-04-1347-01A	0.351438	0.130934	0.0730082	0	0.000314511	0.0451802	0	0.0856322	0	0.09166	0	0.000197058	0.107451	0	0	0.106137	0	0	0	0.00676098	0	0.00128721
TCGA-04-1338-01A	0.0828609	0.19737	0.0736537	0.01791	0.0359399	0	0.00217474	0.188132	0	0.0600188	0.185439	0.0463435	0	0	0	0.0296314	0	0	0	0.0805258	0	0
TCGA-61-2097-01A	0.218239	0.175875	0.0113458	0.0929062	0.00446217	0.0527525	0	0	0	0.0749127	0	0.0295257	0.0210065	0	0	0.0599649	0	0.0993646	0	0.145644	0	0.0140007
TCGA-36-1568-01A	0.185587	0.143346	0.0676309	0.0163793	0.042593	0	0.00893216	0.0548982	0	0.24237	0	0.0343999	0.0648858	0	0	0.0598226	0.0440745	0	0.0312106	0	0	0.00386957
TCGA-24-2036-01A	0.254462	0.360007	0.00178877	0.00800324	0	0.0509897	0	0	0.00780047	0.154637	0	0.0118018	0.00224224	0.0317999	0	0.0154963	0.0057358	0.0219922	0.0732442	0	0	0
TCGA-13-0797-01A	0.0186277	0.114117	0.0397575	0.0598815	0	0.0821131	0.0131922	0.161715	0	0.189138	0	0.0652539	0.0863572	0	0	0.0810665	0	0.0823129	0.00646822	0	0	0
TCGA-57-1585-01A	0.297756	0.104165	0.0433835	0.0392786	0.0420672	0	0.0292166	0.0769541	0	0.179398	0	0.0265525	0.0520473	0	0	0.0125075	0.0525083	0	0	0.0405922	0	0.00357342
TCGA-13-0727-01A	0.150554	0.408929	0.00593306	0.102731	0.00629009	0.00939769	0	0.0446728	0	0.124436	0	0.010558	0.0131264	0	0	0.0577459	0	0.0570186	0	0.00860822	0	0
TCGA-13-1505-01A	0.0562385	0.108584	0.0850427	0.0578328	0.0428056	0.000804976	0.0821719	0.124049	0	0.25586	0	0.101102	0.0500718	0	0	0.005742	0.00585315	0.01162	0.00881982	0	0	0.00340168
TCGA-25-2042-01A	0	0.207023	0.0274424	0.0982837	0.0721246	0	0.0134293	0.0896461	0	0.243318	0	0.000971797	0.0303694	0	0	0.0103782	0	0.0655367	0	0.104791	0	0.036686
TCGA-24-2289-01A	0.00743757	0.31727	0.0396727	0.191164	0.0376837	0	0	0.00718008	0	0.208554	0	0.0137691	0.0594301	0	0	0.0134451	0	0.00689924	0	0.097494	0	0
TCGA-23-1030-01A	0.470229	0.10711	0.0799033	0.00993916	0.0408561	0	0	0.0346887	0	0.131479	0	0.0233891	0.0723134	0	0.00591559	0.0238066	0	0	0.000370145	0	0	0
TCGA-13-1405-01A	0.0579516	0.111769	0.0634378	0.00594952	0.179767	0	0.0872073	0.156399	0	0.123961	0.0750875	0	0.00242285	0	0	0.0893804	0	0.00352596	0.0431408	0	0	0
TCGA-29-2414-01A	0.268882	0.116766	0.0263752	0.0573762	0.151202	0	0	0.0801533	0	0.196392	0	0.074454	0	0	0	0.0147717	0	0.0136266	0	0	0	0
TCGA-WR-A838-01A	0.315215	0	0.0261984	0	0.0485492	0	0.0263777	0	0	0.207646	0	0.026209	0.139934	0	0.126233	0	0	0	0.0836379	0	0	0
TCGA-25-2391-01A	0.043202	0.131062	0	0.103699	0.0896622	0	0	0.102441	0	0.070425	0	0.049221	0.0484754	0	0	0.0723378	0	0.250057	0	0	0	0.0394184
TCGA-13-1407-01A	0.33657	0.017934	0.0420513	0.0265995	0	0.107333	0.0265864	0.0786961	0	0.147916	0	0.0550591	0.0501547	0	0	0.105926	0	0	0.00517441	0	0	0
TCGA-29-1766-01A	0.16638	0.12927	0.0412285	0.0168389	0.0327115	0.00185192	0	0.150362	0	0.177601	0	0.0443269	0.0322451	0.00913357	0	0.0812579	0	0.0729037	0.0374481	0	0	0.00644078
TCGA-25-1328-01A	0.267335	0.187433	0.0452304	0.0432893	0.0919171	0	0.012775	0.0273061	0	0.145219	0	0.00905256	0.0590875	0	0.0075749	0.0396377	0.0352984	0	0.0284528	0	0	0.000391869
TCGA-25-1877-01A	0.297231	0.202296	0.110563	0	0.0232914	0	0.00678432	0.139637	0	0.031466	0	0.0592611	0.0173842	0.000666422	0	0.0849112	0.0160772	0	0.00890523	0	0	0.00152512
TCGA-13-0714-01A	0.131229	0.111928	0.0549111	0.0220208	0.0996354	0.000693114	0.0111559	0.128871	0	0.222597	0	0.0370326	0.0547551	0	0	0.0765797	1.11e-05	0	0.0479144	0	0	0.000666047
TCGA-24-1924-01A	0	0.17007	0.13307	0.0794368	0.0999956	0	0.087773	0.154359	0	0.0831048	0.0314904	0.0890273	0.00054331	0	0	0.0227316	0.0226042	0	0	0.0149902	0	0.0108036
TCGA-24-1105-01A	0.152003	0.212021	0.0638642	0.0134478	0.0756262	0	0.0203801	0.0932941	0	0.242141	0	0.0581512	0.0308883	0	0	0.0136818	0	0	0	0.0245014	0	0
TCGA-24-1430-01A	0.224924	0.286709	0.040982	0	0.0881798	0.0354477	0	0	0.00357627	0.0737326	0	0.0575858	0.0117028	0.070349	0	0	0	0	0.106811	0	0	0
TCGA-04-1542-01A	0.168387	0.185875	0	0.0345122	0.0149767	0.0786617	0	0.0310584	0	0.190322	0	0.0226445	0.0366153	0	0	0.0612514	0	0.154309	0	0.0213865	0	0
TCGA-24-1923-01A	0.0745695	0.31976	0.0495541	0.125189	0.0911353	0.00607491	0	0.00969031	0	0.149891	0	0.0116862	0.00400838	0	0	0.0158767	0	0.113748	0	0.028817	0	0
TCGA-10-0933-01A	0.0697944	0.093164	0.029592	0.0893095	0	0.0982477	0	0.111029	0	0.178432	0	0.0304982	0	0	0	0.164851	0	0.0839189	0.0511638	0	0	0
TCGA-23-1110-01A	0.332235	0	0.0023256	0.0791209	0	0.0581973	0.0128137	0.0483075	0.150663	0	0	0.0162214	0.00386527	0	0.0652042	0	0.00380259	0	0.209621	0	0.017623	0
TCGA-24-1557-01A	0.260472	0.141355	0.108783	0.0908863	0.0122343	0	0.00822572	0.00495005	0	0.138751	0	0.0500258	0.0325828	0	0	0.0186288	0	0	0.133105	0	0	0
TCGA-09-0366-01A	0	0.402699	0.0126725	0.341957	0.0158895	0	0	0.0397095	0	0.0562251	0	0.0213099	0.0154546	0	0	0.0481422	0	0.0302859	0	0.0156546	0	0
TCGA-24-1413-01A	0.232474	0.181956	0.0608552	0.0162391	0.000791659	0.00632038	0.000467378	0.0455133	0	0.0221348	0	0.118276	0.0248458	0.00132538	0	0.0822428	0	0.0485207	0.151471	0	0.00162762	0.00493952
TCGA-10-0927-01A	0.0487901	0.131739	0.034562	0.0186381	0.0578713	0	0.0476679	0.233609	0	0.241923	0	0.00108747	0.0016384	0	0	0.0868677	0	0.0194082	0	0.076198	0	0
TCGA-24-1603-01A	0.269395	0.106977	0.111569	0.0342106	0	0.0181951	0	0.0198197	0	0.175137	0	0.0384092	0.073065	0.0178248	0	0.0208594	0	0	0.0928828	0	0	0.0216541
TCGA-24-1425-01A	0.305257	0.184104	0.0772026	0	0.0905377	0	0	0.0294927	0	0.177825	0.00756793	0.0220525	0.0500686	0	0.043296	0	0	0	0.00416662	0	0	0.00842964
TCGA-09-1667-01C	0.224478	0.115463	0.118378	0.01521	0.0574308	0	0.0185376	0.0788516	0	0.177884	0	0.023437	0.0738736	0	0	0.0813028	0.00118826	0.0105884	0	0	0	0.00337705
TCGA-61-2104-01A	0.17504	0.163595	0.167	0	0.0464374	0	0.00184715	0.0592886	0	0.150998	0	0.0345861	0.0497396	0	0.0428809	0	0	0.0548733	0	0.046117	0	0.00759681
TCGA-24-0970-01B	0.23153	0.250483	0.0114692	0.0162167	0.108195	0	0	0.0287379	0	0.084128	0	0.0385996	0.0506733	0	0	0.0613788	0	0.0917576	0.0268316	0	0	0
TCGA-24-1928-01A	0	0.265234	0.101532	0.0648344	0.0190781	0.00321448	0	0.0928624	0	0.308327	0	0.0599611	0.0240641	0	0.00667305	0.00702068	0	0	0	0.0471981	0	0
TCGA-24-1558-01A	0.615674	0.194392	0.0176517	0	0	0.021084	0.00367337	0	0	0.0694277	0	0.00525645	0.0271388	0	0	0.0317998	0	0	0.0139029	0	0	0
TCGA-13-0795-01A	0	0.421196	0.0268755	0.0511492	0.024568	0.0136429	0.019123	0.193374	0	0.0748561	0	0.022293	0.0198739	0	0	0.0622361	0.00075933	0.00437035	0.0562301	0	0	0.0094526
TCGA-29-2427-01A	0.145188	0.234093	0.134749	0	0.0137957	0	0.0157447	0.196425	0	0.129731	0	0.0306068	0.0317019	0	0.0295911	0.00744612	0	0	0.0309283	0	0	0
TCGA-25-1323-01A	0.307544	0.163037	0.0277591	0.009904	0	0	0.00342893	0	0	0.185797	0	0.0417968	0.0340042	0	0	0.113999	0	0	0	0.112729	0	0
TCGA-61-1911-01A	0.00880766	0.117208	0.0794316	0	0.0561148	0	0.0972073	0.243825	0	0.106464	0.0207779	0.0292695	0.077053	0.0388861	0	0.0953045	0.00188506	0	0.026512	0	0	0.00125355
TCGA-29-2428-01A	0.179289	0.191607	0.0711371	0	0.00320217	0.012201	0.0337907	0.150661	0	0.120602	0.0550107	0.0464133	0.0619015	0.0184083	0	0	0.0352669	0	0	0.0205096	0	0
TCGA-09-1665-01B	0.0479252	0.160711	0.112515	0.0151179	0	0.0873017	0	0.0306866	0	0.228912	0	0.0878601	0.00522946	0.0454787	0	0.0460008	0	0.10858	0.0236817	0	0	0
TCGA-09-0364-01A	0.00843599	0.317067	0	0.0466823	0	0.200598	0	0.0121261	0	0.33979	0	0	0	0	0	0.0448545	0	0	0	0.0304459	0	0
TCGA-13-1492-01A	0.128691	0.264393	0.065525	0.0468886	0.0606305	0	0.00650029	0.154628	0	0.0122208	0	0.0320297	0.019035	0	0	0.0437047	0	0.11636	0.0493945	0	0	0
TCGA-30-1891-01A	0.234094	0.15493	0.0673106	0.0165484	0.0820387	0	0.011585	0.145089	0	0.195991	0	0	0.0497042	0	0	0.00418582	0	0	0	0.0187711	0	0.0197525
TCGA-13-1506-01A	0.110246	0.0533354	0.0233459	0.0281608	0.113785	0	0	0.0436985	0	0.168567	0	0.00956005	0.0499516	0	0	0.0571327	0	0.266666	0	0.0610705	0	0.0144805
TCGA-57-1583-01A	0.664342	0.0338494	0.0518417	0	0	0.0483363	0	0.00687845	0	0.0870334	0	0.00983467	0	0	0.0292627	0.00308721	0	0.0579255	0.00760896	0	0	0
TCGA-04-1514-01A	0.181002	0.0802174	0.0913557	0.09207	0.00214447	0	0	0.109307	0	0.0860085	0	0.171504	0.0776453	0	0	0.0680398	0	0	0.0407062	0	0	0
TCGA-09-2044-01B	0.0882354	0.236463	0.0662582	0.120492	0.0799702	0	0.0292438	0.0859752	0	0.115505	0	0.052168	0.0608917	0	0	0.0585475	0	0.00232486	0	0	0	0.00392519
TCGA-24-1423-01A	0.17248	0.117402	0.158935	0.0108511	0.0913606	0	0.00911788	0.0645199	0	0.12516	0	0.0531097	0.0727567	0	0	0.101006	0	0.0232996	0	0	0	0
TCGA-30-1718-01A	0.0178158	0.2204	0.077632	0.012279	0.0851846	0	0.0535176	0.0993674	0	0.238741	0.00292874	0.0630776	0.0505867	0	0	0.0313779	0	0.0433427	0	0	0	0.00374872
TCGA-13-0886-01A	0.159479	0.164528	0.112618	0.0195528	0.0152672	0.0507678	0.000642646	0.0776079	0	0.198019	0	0.117288	0.026655	0.0158746	0	0.032377	0	0.00682431	0.0024986	0	0	0
TCGA-20-0991-01A	0.160175	0.197955	0.0518965	0.0491625	0.00770405	0.00478723	0.0319355	0.161269	0	0.131291	0.0378703	0.0171843	0.0756528	0	0	0.0590463	0.00264391	0	0.00620868	0	0	0.00521888
TCGA-24-1464-01A	0	0.171394	0.0641928	0.0251469	0.00656587	0.0249046	0	0.293976	0	0.170744	0	0.0342648	0.105904	0	0	0.102907	0	0	0	0	0	0
TCGA-13-1488-01A	0.236745	0.0258855	0.130509	0.0291453	0.0539183	0.0137595	0.0424498	0.124078	0	0.115647	0.0404154	0.0184933	0.0945547	0	0	0.0267026	0	0.0476964	0	0	0	0
TCGA-24-1847-01A	0.105204	0.0959696	0.0993197	0.0253731	0.0278426	0	0.00490525	0.27653	0	0.150397	0.013583	0.0724877	0.0813741	0	0	0.0233953	0.00872217	0	0.0148972	0	0	0
TCGA-25-1316-01A	0.0594153	0.115845	0.0865407	0.0170761	0.0324473	0	0	0.324003	0	0	0	0.0278367	0.117709	0	0	0.162272	0	0	0.0568549	0	0	0
TCGA-04-1341-01A	0.109886	0.05791	0.0634048	0	0.00238365	0.0521582	0.193796	0.149604	0	0.124545	0	0.101586	0.0356309	0	0	0.0743848	0	0.0212457	0	0.0134656	0	0
TCGA-13-1485-01A	0.472197	0.116907	0.021694	0	0.00300761	0.0273436	0	0.00751886	0	0.117203	0.00553299	0.000433548	0.0352558	0	0.0184498	0	0.135485	0.0103484	0	0.0271124	0	0.00151176
TCGA-24-2254-01A	0.437966	0.182444	0.00471069	0.061165	0	0.00274247	0.000434848	0.0129474	0	0.0492117	0	0.0155999	0.00668402	0	0.0164024	0	0	0	0	0.209691	0	0
TCGA-25-2399-01A	0.143291	0.196381	0.100886	0.0205541	0.0674457	0	0.00542228	0.0742339	0	0.153482	0.0371642	0.0299801	0.0156368	0	0.0100366	0.100026	0	0	0.0454303	0	0	3.03e-05
TCGA-13-1511-01A	0.140282	0.189622	0.121738	0.00961054	0	0.0694752	0	0.0398981	0	0.175567	0	0.00404677	0.0379095	0	0.00618964	0.0680947	0	0.121814	0.0143325	0	0	0.00142028
TCGA-30-1860-01A	0.0315331	0.143912	0.141683	0.050722	0.0244397	0	0.0413393	0.162921	0	0.142313	0.0318727	0.078791	0.0825708	0	0.0148056	0.0225431	0.000836836	0	0	0.0297176	0	0
TCGA-25-2400-01A	0.0415469	0.304138	0.0490847	0.00726467	0	0.0406609	0	0.0220948	0	0.192166	0	0.07433	0.0381062	0	0	0.0691127	0	0.0896115	0.0718838	0	0	0
TCGA-24-1435-01A	0.130307	0.26514	0.179504	0.0235608	0	0.0238487	0	0.103163	0	0.153231	0	0.00762742	0.0447242	0	0	0.0255003	0.0217361	0.00385414	0.0178035	0	0	0
TCGA-61-2009-01A	0.0619092	0.363277	0.0821526	0.0303466	0	0.0138852	0.0162298	0.155781	0	0.132789	0.0408217	0.00618827	0.0252505	0	0	0	0.0594046	0	0.011964	0	0	0
TCGA-36-1569-01A	0.126266	0.151588	0.0970909	0.0114899	0.042523	0	0.0220052	0.171337	0	0.126105	0.000104389	0.0564102	0.0633836	0	0	0.0282108	0.0666297	0	0.0258873	0	0	0.0109697
TCGA-23-1116-01A	0.253298	0.255411	0.0833511	0	0.0251115	0	0	0.00209014	0	0.0923906	0	0.0129066	0.0274991	0	0	0.0346301	0.0129027	0	0	0.11003	0	0.0903786
TCGA-04-1350-01A	0.299513	0	0.0260993	0	0	0.0235895	0	0.200405	0	0.00761331	0	0.0624638	0.0542056	0.0185273	0	0.0275135	0	0	0.268613	0	0	0.0114575
TCGA-23-2077-01A	0.20583	0.31903	0.0726908	0.0171916	0	0.0184214	0	0.10223	0	0.0673239	0	0.018332	0.0929554	0	0	0.00479922	0.0138517	0	0.0673442	0	0	0
TCGA-24-1416-01A	0	0.175777	0.00480422	0.102752	0	0.0154761	0	0.000880995	0	0.162654	0	0.0825543	0.00865611	0	0	0.111977	0	0.167029	0	0.16093	0	0.0065093
TCGA-09-1673-01A	0.12868	0.298633	0.0566702	0.0275903	0	0.0232177	0	0.130183	0	0.0901612	0	0.0296289	0.037091	0	0	0.0253949	0.0011638	0	0.136701	0	0.0088388	0.00604624
TCGA-09-2054-01A	0.235013	0.192662	0.0768914	0.0126302	0.0990793	0	0.102556	0.0974084	0	0.0890496	0	0.077534	0.014337	0	0	0	0	0	0.00284001	0	0	0
TCGA-24-1428-01A	0.429662	0.135817	0.0761224	0.0161902	0	0.0368428	0.0112473	0.0244898	0	0.0886835	0	0.0167796	0.0865118	0	0	0.0564818	0	0.0211712	0	0	0	0
TCGA-25-2398-01A	0.578046	0.15252	0.010235	0	0.00779676	0.00724174	0	0.040689	0	0.0974099	0	0.00666054	0.00755999	0	0	0.0612915	0	0	0.0305501	0	0	0
TCGA-09-1669-01A	0.176898	0.130076	0.0504909	0.0126085	0.0343031	0	0.106493	0.161094	0	0.179957	0.0340314	0.0459243	0.0570281	0	0	0.00582948	0	0	0	0.00526628	0	0
TCGA-29-1778-01A	0.0855242	0.256315	0.0283099	0	0.00743254	0	0.0426482	0.0813584	0	0.197403	0.0105158	0.0294991	0.0978352	0	0.0770995	0.00708448	0	0.0727092	0.00626593	0	0	0
TCGA-24-1563-01A	0.177445	0.129839	0.0316725	0.0601982	0.00522794	0.0375165	0	0.0304044	0	0.21809	0	0.0245651	0.0222468	0	0	0.124889	0.00931636	0.0210831	0	0.0922187	0.00486377	0.0104234
TCGA-25-2401-01A	0.107714	0.196283	0.110785	0.142985	0.0564895	0	0.0140169	0.0654752	0	0.134413	0	0.0503592	0.0276372	0	0	0.039767	0	0.02802	0.0223177	0	0	0.00373764
TCGA-09-1661-01B	0.112638	0.160233	0.021915	0.0351141	0	0.0147319	0	0.0766929	0	0.248972	0	0.0227033	0.0588624	0	0	0.0823116	0.000687925	0.00725247	0.15338	0	0	0.00450571
TCGA-36-1581-01A	0.187087	0.104202	0.0703726	0	0.057615	0	0.0485235	0.148757	0	0.155584	0.0648125	0.0672562	0.0675136	0	0.0282767	0	0	0	0	0	0	0
TCGA-09-1670-01A	0	0.237287	0.0513164	0.288996	0.00044403	0.0190763	0	0.0181624	0	0.215984	0	0.0454323	0.0164113	0	0	0.0320408	0	0.0525681	0.0222814	0	0	0
TCGA-10-0936-01A	0.0131439	0.10793	0.071856	0.00538007	0.0104034	0.0554552	0.0410365	0.0704277	0	0.226772	0	0.133857	0.0793025	0	0	0.0423324	0	0.134959	0	0.00714324	0	0
TCGA-23-1024-01A	0.0482809	0.139172	0.0529518	0.0329052	0.0133639	0.0567125	0	0.140725	0	0.146802	0	0.123978	0.0465869	0	0.00553061	0.0221607	0	0.161143	0.00968765	0	0	0
TCGA-04-1364-01A	0.595138	0.104267	0	0	0.145097	0	0.000287011	0	0.0252562	0.0662238	0	0	0.0355632	0.0111975	0	0	0	0.009434	0	0.00753685	0	0
TCGA-61-1724-01A	0.27261	0.172127	0.100548	0.00712225	0.0806534	0	0.0561387	0.0481366	0	0.142359	0	0.00737059	0.0617089	0	0.0190034	0.0115895	0	0	0.0181275	0	0	0.00250394
TCGA-13-0908-01B	0.177764	0.207497	0.105028	0.0287249	0.0742411	0	0	0.0410343	0	0.185565	0.0224439	0.0749306	0.0504312	0	0	0.0211418	0.00196185	0	0.00923655	0	0	0
TCGA-25-1319-01A	0.0599574	0.195613	0.0954324	0.1109	0.00433781	0.0305778	0	0.0761281	0	0.261149	0.00880968	0.0342736	0.0218644	0	0.02751	0	0	0.0487137	0.0247325	0	0	0
TCGA-23-1023-01A	0.102888	0.177896	0.135506	0.0844536	0.012702	0	0.00761435	0.165155	0	0.0870463	0	0.00876763	0.0348473	0	0	0.0665219	0	0	0.116602	0	0	0
TCGA-24-1844-01A	0.183003	0.215222	0	0.0671008	0	0	0.00445535	0	0	0.142881	0	0.00889799	0.0151875	0	0	0.0717459	0.0236403	0	0.258497	0	0.00937056	0
TCGA-36-1576-01A	0.0981289	0.214813	0.0660957	0.0316652	0.00345577	0.0145741	0.0393253	0.172123	0	0.129459	0	0.0532388	0.0619997	0	0	0.081616	0.0194587	0	0.00959201	0	0	0.00445433
TCGA-31-1959-01A	0.127396	0.291335	0.0470921	0.0399876	0.0351918	0	0	0.0626284	0	0.200932	0	0.0587507	0.0460889	0	0	0.0260736	0.0114277	0.0333563	0.00063321	0	0	0.0191074
TCGA-24-1562-01A	0.318516	0.0897893	0.03948	0.00233109	0.0337205	0	0	0.0588722	0	0.209359	0	0	0.102013	0	0	0.0763079	0.0444933	0.00412044	0.020997	0	0	0
TCGA-09-0369-01A	0.452111	0.290834	0.0240986	0	0.0259503	0	0	0	0	0.0919768	0	0.000832234	0.0474507	0	0.050589	0	0	0	0.0161574	0	0	0
TCGA-61-1721-01A	0.00642647	0.528982	0.0109134	0.0096603	0.0403081	0	0	0.07982	0	0.167983	0	0	0.0131229	0.000654731	0	0.0176796	0.00507495	0	0.111773	0	0	0.00760122
TCGA-29-2425-01A	0.368648	0.136899	0.0715141	0	0.0059102	0.0351251	0.00433205	0.0544001	0	0.120317	0	0.0490862	0.0651617	0	0.046886	0.0199038	0.00936592	0	0	0.0124503	0	0
TCGA-24-2033-01A	0.0722034	0.201584	0.0578112	0.00722271	0	0.0104118	0.0105626	0.188608	0	0.0751624	0	0.0636983	0.0222408	0	0	0.113899	0.00654909	0	0	0.148071	0.0168593	0.00511696
TCGA-61-2111-01A	0.116983	0.209852	0.0468758	0.00874365	0.116961	0	0.0284833	0.0620732	0	0.168529	0	0.0158321	0.0985937	0	0	0.0414999	0.0384953	0	0.0431599	0	0	0.00391827
TCGA-13-0885-01A	0.0320409	0.224335	0.12435	0.00873524	0.00384303	0.0193232	0	0.213383	0	0.0981656	0.0190009	0.0557224	0.0980617	0	0	0.0466032	0.0131727	0	0.0432632	0	0	0
TCGA-24-1843-01A	0.305234	0.175786	0.0574513	0	0	0.0264156	0.0522846	0.124857	0	0.0914416	0	0.0305397	0.0534221	0	0	0.0682622	0.000416546	0	0	0.0133518	0	0.000536771
TCGA-13-1477-01A	0.297747	0.214964	0.087222	0.0162304	0	0.0383983	0.0130752	0.0591787	0	0.067622	0	0.0385338	0.0292917	0	0	0.0348494	0	0	0.102888	0	0	0
TCGA-25-1635-01A	0.0358405	0.22035	0.0599727	0.0927141	0.0727705	0	0.0137838	0.109068	0	0.294471	0.016043	0.0109059	0.0362106	0	0.0118035	0	0	0.0089785	0.0170222	0	0	6.56e-05
TCGA-25-1632-01A	0.159652	0.204144	0	0.0141796	0.0924829	0	0	0	0	0.105051	0	0.0053936	0.0472358	0	0.0249389	0	0	0.273638	0	0.0688076	0	0.00447613
TCGA-25-1634-01A	0.229025	0.0620573	0.0164552	0	0.228589	0	0.029883	0	0	0.17862	0	0.0135186	0.0199126	0	0.0437203	0	0.0296848	0	0.148535	0	0	0
TCGA-30-1853-01A	0.269936	0.13913	0.0215912	0.00428898	0.000773859	0.239314	0	0.0172301	0	0.22414	0	0.0108703	0.0315344	0	0.0293071	0	0	0	0	0.0118849	0	0
TCGA-25-1631-01A	0.201753	0.21421	0.0388378	0.0360608	0.000225242	0.00336494	0	0.102102	0	0.164596	0	0.0205808	0.0587434	0	0	0.0402718	0	0.048226	0.067961	0	0	0.00306719
TCGA-36-1574-01A	0.290248	0.124537	0.150421	0	0.0259017	0	0	0.0136382	0	0.229524	0	0.023481	0.0178099	0	0.00701606	0.0187849	0.00320081	0.0894205	0	0.00601736	0	0
TCGA-13-1411-01A	0.376811	0.168522	0.101066	0	0.0247013	0.0129194	0	0.0330275	0	0.11454	0.037233	0	0.0336372	0	0	0.056927	0	0	0.0143584	0	0	0.026257
TCGA-13-0724-01A	0.202872	0.126903	0.0213426	0.0108539	0.17136	0	0	0.177887	0	0.0383949	0	0.0378874	0.10458	0	0	0.0377153	0	0.0618006	0	0.00840254	0	0
TCGA-61-2102-01A	0.492985	0.221174	0.00615169	0	0.0026003	0	0.00409773	0	0	0.148296	0.00033045	0.00264881	0.0469592	0	0.0476036	0	0	0	0.0271538	0	0	0
TCGA-13-0916-01A	0.15416	0.109438	0.186043	0	0.0819047	0	0.0192191	0.158036	0	0.0953502	0.00490212	0.0784686	0.0550763	0	0.0510719	0	0	0	0.0063297	0	0	0
TCGA-13-0923-01A	0.0586023	0.0843509	0.0721153	0.0233966	0.0607523	0	0	0.25391	0	0.00873519	0	0.210379	0.0173393	0	0.0109896	0.0494094	0	0.0857386	0	0.0623035	0	0.00197846
TCGA-57-1586-01A	0.265384	0.080537	0.120754	0.014374	0.0581904	0	0.00389656	0.0310031	0	0.160206	0	0.0421908	0.120636	0	0	0.0134591	0	0	0.0893688	0	0	0
TCGA-25-1627-01A	0.286251	0.138039	0.0404396	0.00565981	0.0833646	0	0.0254221	0.0230984	0	0.198786	0	0.0315945	0.028614	0	0	0.0857509	0.0315247	0	0	0.014224	0	0.00723095
TCGA-61-1998-01A	0.559585	0.230392	0.0194283	0	0.00260178	0.00149804	0	0.00955536	0	0.06608	0	0.017914	0.0388732	0	0	0.0377083	0.00968136	0	0.00362823	0	0	0.00305479
TCGA-13-0888-01A	0.50274	0.0591963	0	0	0.197632	0	0.0121976	0.0169653	0	0.0719456	0	0	0.0383093	0	0	0.0371459	0	0.018761	0.0451063	0	0	0
TCGA-13-0762-01A	0.482605	0.104844	0.0137004	0	0.00436704	0.0163054	0.00195858	0.0139041	0	0.140057	0	0.00519542	0.0533242	0	0	0.109931	0	0	0.0538082	0	0	0
TCGA-24-0979-01A	0.286918	0.0244429	0.123715	0.0229176	0	0.0163053	0	0.0176436	0	0.182828	0	0.119988	0.00109342	0.0157974	0	0.00849465	0	0.0180116	0.152611	0	0.00923352	0
TCGA-04-1356-01A	0.498056	0.0352864	0.0299163	0	0.0352933	0	0.00249121	0.052832	0	0.166507	0	0.0290619	0.031977	0	0	0.0145088	0	0	0	0.10407	0	0
TCGA-09-2045-01A	0.104793	0.167812	0.0260457	0.0179064	0.0679617	0	0.00263335	0.0628101	0	0.134068	0	0.038941	0.0903072	0	0	0.105449	0	0.129284	0.043611	0	0	0.00837744
TCGA-29-1769-01A	0.0339655	0.18158	0.0513861	0.143136	0.0410187	0	0	0.101174	0	0.249729	0	0.0633132	0.00543428	0.0215501	0	0.0431371	0	0.0643631	0	0	0	0.000213036
TCGA-09-1668-01B	0.190659	0.0661158	0.0702176	0	0.101353	0	0.00678781	0	0	0.215035	0.0193375	0.0799354	0.0499943	0	0	0.0352028	0	0.122475	0	0.0416958	0	0.0011915
TCGA-OY-A56Q-01A	0.180941	0.185889	0	0	0	0.0870712	0	0.053652	0	0.0711913	0	0.105953	0.00593384	0	0	0.126353	0	0	0.175606	0	0.0074103	0
TCGA-24-1470-01A	0.0722932	0.179581	0.0720197	0.0210355	0.043192	0	0	0.117024	0	0.202531	0.0127626	0.0806302	0.0978339	0	0.036268	0	0.0369688	0.0245582	0	0.00302965	0	0.0002719
TCGA-57-1994-01A	0.193066	0.108548	0.0431554	0.0135226	0.123776	0	0.017556	0.188443	0	0.115595	0	0.0463611	0.109662	0	0	0.0327754	0	0	0.00753945	0	0	0
TCGA-24-2271-01A	0.0667187	0.0529865	0.127977	0.0291867	0.0848023	0	0.00590886	0.0869268	0	0.270309	0	0.0710994	0.128494	0	0.00993941	0.0439541	0.0030281	0	0	0.0186694	0	0
TCGA-30-1861-01A	0.268628	0.192428	0.0924848	0	0.0380932	0	0.00102393	0.0474083	0	0.285735	0	0	0	0	0.0315535	0	0	0	0	0.042646	0	0
TCGA-09-1662-01A	0.31054	0.179673	0.0603932	0.0248464	0	0.034387	0	0.068598	0	0.158497	0	0	0.0602819	0	0	0.0932072	0	0	0	0	0	0.00957543
TCGA-61-2008-02A	0.102161	0.179257	0.0577883	0	0.0135229	0	0.000957283	0.236565	0	0.0982665	0.0578004	0.0630123	0.0671113	0	0.00230952	0.0577571	0.032193	0	0.0312987	0	0	0
TCGA-24-1552-01A	0.306064	0.151614	0.00887966	0.0241575	0	0.0149999	0.00398757	0.136881	0	0.134901	0	0.0844224	0.117764	0	0	0	0	0	0.0151692	0	0	0.00115933
TCGA-24-1424-01A	0.172682	0.235192	0.129003	0.0122391	0.0642319	0	0	0.0453744	0	0.136054	0.000382375	0.0621676	0.0314028	0	0	0.0442357	0	0.0112243	0.0169209	0	0	0.0388897
TCGA-13-0804-01A	0	0.303395	0.0334622	0.0217083	0	0.153528	0	0.114875	0	0.0926464	0	0.0272078	0.051037	0	0	0.134131	0.0198969	0	0	0.040012	0.00306588	0.00503475
TCGA-24-1553-01A	0.0573601	0.123442	0.101095	0.039722	0	0.0533093	0.00978193	0.356801	0	0.0753598	0.0044132	0.0330506	0.107957	0	0	0.02936	0	0	0	0.00834783	0	0
TCGA-61-2101-01A	0.211617	0.18013	0.0725318	0	0.0172805	0.000716901	0	0.0474941	0	0.229865	0	0.00775935	0.0700423	0	0.00814737	0.00407855	0.111917	0.00966435	0.0287556	0	0	0
TCGA-29-1691-01A	0.026457	0.288939	0.0842174	0.0888233	0.0612908	0	0	0.121809	0	0.147765	0	0.0482274	0.0933561	0	0	0.0250796	0	0	0.0140356	0	0	0
TCGA-24-1422-01A	0.0952474	0.273085	0.043824	0.0902493	0.0253616	0	0	0.0694992	0	0.181031	0.0143387	0.025097	0.0430808	0	0.0586975	0.0669544	0.00995205	0.00358237	0	0	0	0
TCGA-29-1768-01A	0.0856956	0.167705	0.116198	0.0212821	0.0486071	0	0.0111629	0.142576	0	0.212634	0.0208093	0.0372663	0.0361502	0.00196742	0	0.0298935	0.0204628	0	0.0452534	0	0	0.00233668
TCGA-25-1312-01A	0.0427876	0.24094	0.0325267	0.101878	0.0873282	0	0	0.0472786	0	0.144135	0	0.0194077	0.0454899	0	0	0.117779	0	0.120448	0	0	0	0
TCGA-24-1434-01A	0.0381085	0.2158	0.10371	0.143354	0.00856506	0.00207927	0	0.0239263	0	0.219687	0	0.0386455	0.0345706	0	0	0.0545539	0	0	0	0.117	0	0
TCGA-20-0987-01A	0.237015	0.174414	0.084191	0.0628204	0.00982446	0.013777	0.0613533	0.0967907	0	0.12834	0	0.0158584	0.0460785	0	0.0381792	0.0141596	0	0	0.0171979	0	0	0
TCGA-61-1741-01A	0.360281	0.158447	0.0775648	0	0.0632921	0	0.0357486	0.0397212	0	0.0932133	0	0.077422	0.0734593	0	0.0135197	0	0	0	0.00733069	0	0	0
TCGA-29-1761-01A	0.262019	0.206095	0.0998871	0	0.0526845	0	0.00520194	0.146785	0	0.111022	0.00494651	0.0440675	0.0456478	0	0	0	0.00215655	0	0.00751424	0	0	0.0119731
TCGA-24-2293-01A	0.289976	0.18401	0.0974055	0.0444128	0.065392	0	0	0.0775665	0	0.154655	0	0	0.0652845	0	0	0.00881476	0	0	0.0103129	0	0	0.00216977
TCGA-24-2026-01A	0.189314	0.159651	0.117971	0.0150326	0.0250413	0.0279144	0.041711	0.0929811	0	0.126655	0	0.051166	0.0731545	0	0.0186796	0.0436732	0	0	0	0.0104084	0	0.00664746
TCGA-31-1946-01A	0.333658	0.314111	0.0545949	0	0.0424622	0	0	0.0395592	0	0.101441	0.0101755	0.0450576	0.0490153	0	0.00415454	0.00220182	0	0.000833701	0	0.00273429	0	0
TCGA-13-0911-01A	0.492805	0.0816439	0.0478218	0.0538762	0.0731837	0	0.0181421	0.0175035	0	0.0846913	0	0.0132601	0.0471762	0	0.00162772	0.00589777	0.058656	0.00371502	0	0	0	0
TCGA-25-2409-01A	0.0143363	0.305594	0.11774	0.0571598	0.0526082	0	0.0189807	0.0549065	0	0.128274	0	0.0116127	0.0836337	0	0.0505677	0.0393152	0	0.029075	0.0361958	0	0	0
TCGA-24-1471-01A	0	0.215731	0.0804677	0.231876	0	0.0180069	0	0.00669858	0	0.292251	0	0.0619634	0.0164093	0	0	0.0376607	0	0.0180407	0.0163067	0	0	0.0045878
TCGA-59-A5PD-01A	0.384037	0.105941	0.0504617	0.00119529	0.00879495	0.0474884	0	0.0257222	0	0.231504	0	0.0321119	0.0332444	0	0	0.0460443	0	0	0	0.0334547	0	0
TCGA-61-1918-01A	0.081987	0.296456	0.113344	0.0651605	0.0226125	0	0	0.0605654	0	0.0893412	0	0.0227586	0.0804932	0	0.0244094	0.0245357	0.0722372	0	0.0460992	0	0	0
TCGA-13-0920-01A	0.0459317	0.0817723	0.0927454	0.00788275	0	0.110444	0.0782773	0.128824	0	0.191552	0	0.0698876	0.0367886	0	0	0.0485097	0	0.0874949	0.0198899	0	0	0
TCGA-29-1785-01A	0.0220021	0.196221	0.111739	0.00582955	0.000179599	0.0332311	0	0.137699	0	0.0793785	0.0476732	0.0526306	0.0832414	0	0	0.133858	0.0089375	0	0.0832081	0	0	0.0041713
TCGA-29-2414-02A	0.0953337	0.148052	0.130003	0	0.0362633	0	0.000752833	0.184356	0	0.128193	0.00816107	0.0649761	0.0934028	0	0	0.0440583	0.0253206	0	0.0411275	0	0	0
TCGA-13-1499-01A	0.0555416	0.0758989	0.0936832	0.0313697	0.110748	0	0.101956	0.141038	0	0.0915613	0.026486	0.0447712	0.114322	0	0	0.0561536	0.00275624	0	0.0508652	0	0	0.00284909
TCGA-13-0887-01A	0.0355191	0.126635	0.0286146	0.0498899	0.120962	0	0.0367755	0.0401356	0	0.0872494	0	0.0688568	0.0258851	0	0	0.0715659	0	0.233214	0	0.0729663	0	0.00173096
TCGA-25-1633-01A	0.0161579	0.195146	0.0692565	0.0844161	0.0979947	0	0	0.188958	0	0.137237	0.0600873	0.053954	0.0545214	0	0.00961341	0	0	0.00244266	0	0.0188706	0	0.0113448
TCGA-24-1567-01A	0.361476	0.153944	0.00801339	0	0.0725786	0	0	0.133841	0	0	0	0.0468677	0.056754	0	0	0.0811837	0	0.0686116	0	0.0167305	0	0
TCGA-57-1993-01A	0.404482	0.323045	0.0319975	0	0.0264935	0.0386686	0	0.0100234	0	0.105979	0	0.00221119	0.0188368	0	0.0081255	0	0	0.010115	0.0200222	0	0	0
TCGA-29-1784-01A	0.102701	0.222804	0.088552	0.0393707	0.0308997	0.00756332	0.0693374	0.119831	0	0.216436	0.00547047	0.037822	0.0500021	0	0	0	0	0	0	0.00296584	0	0.00624523
TCGA-30-1714-01A	0.119237	0.286145	0.017537	0.0459178	0.0775573	0	0	0.00567043	0	0.202196	0	0.0666889	0	0	0	0.131967	0	0.031954	0	0.0138737	0	0.00125537
TCGA-57-1582-01A	0.101913	0.228862	0.076519	0.0418074	0.0164859	0.0182661	0.0393606	0.113641	0	0.214358	0.00940293	0.052514	0.0413891	0	0	0	0	0	0.0454797	0	0	0
TCGA-61-2012-01A	0.289075	0.0590092	0.111847	0	0.0525525	0	0.0938614	0.0454311	0	0.145562	0	0.0462149	0.0770476	0.0170356	0	0.0174529	0	0	0	0.0260561	0	0.0188544
TCGA-13-1510-01A	0.118446	0.0688596	0.114297	0.0174387	0.037184	0	0	0.114301	0	0.144836	0	0.074516	0.116131	0	0	0.0662811	0	0.0948278	0.0328817	0	0	0
TCGA-VG-A8LO-01A	0.0889323	0.0515321	0.0357827	0	0.15283	0	0.000891172	0.0625583	0	0.197091	0	0.143946	0.0253952	0	0	0.0168331	0	0.17448	0	0.0497276	0	0
TCGA-23-2078-01A	0.0434055	0.123591	0.163625	0.00908151	0.123375	0	0.00688828	0.161265	0	0.120179	0	0.0149862	0.177597	0	0	0.0139791	0	0	0.0420271	0	0	0
TCGA-09-1666-01A	0.179807	0.158282	0.178585	0	0.0152818	0.00149561	0	0.0884757	0	0.225145	0.0378079	0.0272884	0.0198041	0	0.0617213	0	0	0	0	0	0	0.00630611
TCGA-29-1777-01A	0.100393	0.133965	0.133247	0	0.00317765	0	0.040246	0.0347332	0	0.20163	0	0.0968538	0	0.0358337	0	0.0545437	0.0373268	0.0606139	0.0253103	0.015027	0	0.0270985
TCGA-61-2110-01A	0.162084	0.183922	0.022287	0.0754045	0.00651488	0	0.00189959	0	0	0.356463	0	0.00927023	0.059123	0	0.000482528	0.0818907	0.00939733	0	0.0205845	0	0	0.0106763
TCGA-29-1776-01A	0.0315691	0.143049	0.0295173	0.0984128	0.0837251	0	0.0214938	0.0875032	0	0.319111	0.00126511	0.0468757	0.0198138	0	0	0.00525137	0	0.0833851	0	0.0290275	0	0

## Sheet: table S7
Supplementary Table S7. GSE9899(AOCS) analysis of infiltrating cells in the immune microenvironment by bulkRNAseq in cibersort.
samples	Macrophages M0	Macrophages M2	Macrophages M1	Monocytes	B cells naive	B cells memory	Plasma cells	T cells CD8	T cells CD4 naive	T cells CD4 memory resting	T cells CD4 memory activated	T cells follicular helper	T cells regulatory (Tregs)	T cells gamma delta	NK cells resting	NK cells activated	Dendritic cells resting	Dendritic cells activated	Mast cells resting	Mast cells activated	Eosinophils	Neutrophils
GSM249671	0.227827	0.209302	0.0943527	0.0129776	0	0.0665271	0.00560341	0	0	0.0375666	0	0.0945196	0.0505082	0	0	0.0697064	0	0.126439	0	6.67e-05	0	0.00460337
GSM249672	0.0601917	0.210457	0.035044	0.0464838	0	0	0.0507437	0	0	0.248393	0	0.0381857	0.00667802	0	0	0.115571	0.0435875	0.0207028	0.103976	0	0	0.0199857
GSM249673	0.202535	0.0371064	0.0519671	0	0	0	0.0299482	0	0	0.18662	0	0.151734	0	0.0411186	0	0.148259	0	0.0768666	0.0475044	0	0	0.02634
GSM249674	0.0629327	0.161412	0.0274167	0.0994552	0	0.025141	0.0123636	0.124435	0	0.132063	0.00920544	0.0527612	0	0.0670799	0	0.0951586	0	0.0117764	0.0810793	0	0.0174421	0.0202785
GSM249675	0.259349	0.153012	0.0157714	0.00523119	0.0355697	0.0030878	0	0	0	0.157736	0	0.0926396	0.0588141	0	0	0.15597	0	0.0239811	0	0.0200224	0	0.0188159
GSM249676	0.273626	0.164361	0.0609669	0	0.0169005	0	0.00740721	0.10054	0	0.0507922	0	0.0684129	0	0.124448	0	0.0398752	0	0	0.03736	0	0.0306223	0.0246879
GSM249677	0.137858	0	0.293467	0.0174274	0	0.0801794	0.0236256	0.0805649	0	0.117592	0	0.0685237	0	0	0	0.0725811	0.0739344	0	0.0342465	0	0	0
GSM249678	0.144306	0.0906948	0.147519	0	0.0100726	0	0.0503517	0	0	0.0731829	0.0903505	0.100128	0	0.117253	0	0.0408869	0.00463706	0	0.0969637	0	0	0.0336538
GSM249679	0.091476	0.0314372	0	0.068033	0	0.0238079	0.0489912	0.0370737	0	0.171663	0	0	0.105924	0	0.081535	0.0447713	0.201506	0	0	0.0937818	0	0
GSM249680	0.00536762	0.10091	0.0688729	0.0078895	0.0268547	0	0.0470113	0.132831	0	0	0	0.0983116	0	0.140389	0	0.130575	0.135518	0	0.10547	0	0	0
GSM249714	0	0.0954968	0.0116086	0.0644646	0	0.0498153	0.0480522	0.0291112	0	0.186119	0	0.0474277	0.00469016	0	0.00900154	0.0899953	0	0.0477036	0	0.308772	0.00774273	0
GSM249715	0.0219158	0.117994	0.00898136	0.0138061	0	0.109391	0.0479395	0.0998673	0	0.109927	0	0.133525	0.0239417	0	0.00323669	0.0803235	0.141862	0.0161128	0	0.0465126	0	0.0246647
GSM249716	0	0.0897674	0.00804069	0.0152074	0	0.03381	0.0329818	0.0682182	0	0.162943	0	0.0818887	0.0227977	0.0243725	0	0.0394592	0.222837	0.00912049	0	0.146272	0	0.0422833
GSM249717	0	0.154981	0.013323	0	0	0.0869178	0.0330956	0	0	0.20348	0	0.0167933	0.0078731	0.0127067	0	0.0818285	0.0114717	0.00380929	0	0.37372	0	0
GSM249718	0.0440955	0.276818	0.0172029	0.0957414	0	0.0384601	0.0307328	0.0212259	0	0.120712	0	0.0261761	0.0272958	0	0	0.0769703	0.0189481	0.0899242	0	0.0810474	0.0230352	0.0116138
GSM249719	0	0.119466	0	0.0898778	0	0.0662593	0.0435622	0.0901148	0	0.145361	0	0.0520668	0.0558865	0	0	0.0516676	0.160922	0.0403353	0	0.067016	0	0.0174642
GSM249720	0.0711875	0.262625	0.0702238	0.00937313	0	0.071845	0.0511853	0.0984051	0	0.0917456	0	0.0748822	0.0417333	0	0.0011978	0.0297154	0	0.0162763	0	0.0921569	0	0.0174475
GSM249721	0.236009	0.130711	0.00379391	0.281611	0	0.0123495	0.0154173	0.0349452	0	0.0846703	0	0.0294897	0	0	0	0.0195907	0.0534263	0.0618042	0	0.0361809	0	0
GSM249722	0	0.169865	0.0217444	0.0294016	0	0.242615	0.0750768	0.0711999	0	0.103314	0	0	0.0604197	0	0.028274	0.0488109	0	0.0146653	0	0.105945	0	0.0286696
GSM249723	0	0.22874	0.0102961	0.074835	0	0.0833621	0.0564683	0.107055	0	0.0762243	0	0.0913793	0.0425324	0	0	0.109953	0.0593345	0.000590826	0	0.059229	0	0
GSM249724	0	0.196618	0.00210857	0.0382757	0	0.0753299	0.0507451	0.0730556	0	0.20472	0	0	0.0375083	0	0	0.0456104	0.114818	0.0389942	0	0.0747492	0	0.0474662
GSM249725	0.025859	0.197881	0.00189509	0.110272	0	0.0752462	0.0573717	0.0739146	0	0	0	0.113782	0.00802913	0	0	0.129412	0.00527567	0.0482076	0	0.117946	0	0.0349094
GSM249726	0	0.253728	0.022976	0.0641719	0	0.0831103	0.0556462	0.0644326	0	0.161794	0	0.0914538	0.0428139	0	0	0.0727825	0	0.0139617	0	0.0684439	0	0.00468586
GSM249727	0.151186	0.137016	0.0509288	0.03117	0	0.0700663	0.0229641	0	0	0.128898	0	0.0201232	0.0194013	0	0.0133684	0.0272249	0.175273	0	0	0.11025	0	0.0421306
GSM249728	0	0.218611	0	0.0582363	0	0.0197582	0.0265567	0.112197	0	0.178546	0	0.0245022	0	0	0	0.0490379	0.0651998	0.0827706	0	0.141872	0	0.0227126
GSM249729	0.134154	0.227028	0	0	0.0292839	0	0.0298597	0.034073	0	0.108108	0	0.00624644	0.0876881	0	0.0710444	0	0.0739815	0.0456821	0	0.0879635	0	0.0648888
GSM249730	0.0223356	0.0989861	0.0139572	0.0886218	0.00638557	0	0.0402999	0.0269786	0	0.165992	0	0.0864799	0.0339856	0	0	0.120605	0	0.0763382	0	0.219035	0	0
GSM249731	0	0.23597	0.0030331	0.0680482	0	0.036336	0.0341021	0.0935551	0	0.146985	0	0.0601943	0.0285797	0	0	0.128669	0	0.0677843	0	0.0867071	0	0.0100362
GSM249732	0.00933094	0.156521	0.0987923	0.0197444	0	0.0526657	0.0768142	0.10238	0	0.0434474	0	0.176883	0.0503017	0	0	0.0891965	0.0191111	0	0	0.100165	0.00464695	0
GSM249733	0.0332075	0.123184	0.0238218	0.1167	0	0.0117763	0.0556373	0.129511	0	0.269499	0	0.0238882	0.0489214	0	0	0.130845	0.0144803	0	0.0185276	0	0	0
GSM249734	0.0698863	0.225444	0	0.0350215	0	0.000496763	0.078704	0.177674	0	0.05743	0	0.109376	0.00138575	0	0	0.0493146	0.0374993	0.0409943	0	0.0919276	0	0.0248454
GSM249735	0.0517613	0.0868495	0.164791	0.0558956	0	0.0283301	0.0356786	0.21933	0	0	0	0.211982	0	0.0481417	0	0.0225529	0.0116055	0	0	0.0625942	0	0.000487437
GSM249736	0.314307	0.159701	0.101287	0.0171513	0	0.0167293	0.0303794	0.0736988	0	0	0	0.0878364	0.0672874	0	0	0.0829878	0.0105054	0	0	0.0381286	0	0
GSM249737	0.17425	0.0246782	0.122675	0.0300342	0	0.0341904	0.0322884	0.0802576	0	0.135495	0	0.0757677	0	0	0.00612917	0.0361225	0.0701692	0.0050776	0	0.160987	0	0.0118785
GSM249738	0.100989	0.0688406	0.0691853	0	0	0.122725	0.0981761	0.0688798	0	0.187512	0	0.0253442	0.139201	0	0	0.0913815	0.00244773	0	0	0	0	0.025317
GSM249739	0.411936	0.130417	0.0589621	0	0	0.0175017	0.0150925	0.0388358	0	0.0660927	0	0.0519487	0	0	0	0.0378565	0	0.120383	0	0.0509735	0	0
GSM249740	0.20516	0.0964021	0.0990387	0	0	0	0.206357	0.118305	0	0.129306	0	0.0662404	0	0	0.00498166	0	0.000107147	0.046824	0	0.0166457	0	0.0106323
GSM249741	0.241755	0.142167	0.177681	0.00294703	0	0.0305586	0.0438046	0.15055	0	0.0139165	0	0.0807093	0.034691	0	0	0.0213736	0	0	0	0.0557817	0	0.00406446
GSM249742	0.0725739	0.238298	0.147925	0.0209542	0	0	0.0921308	0.121584	0	0.0160318	0	0.108001	0.011865	0	0	0.0697444	0.0497234	0	0.0063675	0.00524847	0	0.0395519
GSM249743	0.316025	0.13771	0.106454	0	0	0.0277158	0.0280614	0.00138077	0	0.0636366	0	0.13571	0.00706037	0	0	0.0506548	0	0.013726	0	0.0840962	0	0.0277682
GSM249744	0.207259	0.0371643	0.0101801	0	0.014676	0	0.0559529	0.0818776	0	0.101427	0	0.0523621	0.0983772	0	0	0.0374747	0.166012	0.0955857	0	0.00923966	0	0.0324114
GSM249745	0.00568617	0.191057	0.225583	0.0413059	0.0184186	0	0.142373	0.0958095	0	0	0	0.115962	0.0246641	0.00691961	0	0.0635085	0.0123525	0	0	0.0350244	0.00194132	0.0193942
GSM249746	0.0223728	0.0836762	0.1276	0.0125572	0	0.0477702	0.0370027	0.111116	0	0	0	0.197636	0.0466545	0.0126915	0	0.18001	0.0237294	0.0476157	0	0.0355202	0	0.0140483
GSM249747	0.0251109	0.0755489	0.231988	0.0590351	0.025833	0	0.0595571	0.185781	0	0	0	0.140745	0.0479307	0	0	0.0452808	0.0258671	0.0230814	0	0.0297919	0	0.0244491
GSM249748	0.15403	0.114574	0.0817343	0	0.0478312	0	0.0710186	0.0642127	0	0.0202006	0	0.0999513	0.0239645	0.0469654	0	0.0663391	0	0.0165158	0	0.178676	0	0.0139868
GSM249749	0.258496	0.190277	0.156154	0.0354304	0	0.0147421	0.0497867	0.0854556	0	0	0.00507603	0.0718957	0.044037	1.2e-06	0.0126362	0.00848339	0.0146426	0	0	0.0437128	0	0.00917268
GSM249750	0.0890534	0.190923	0.258172	0.00966817	0	0.0128263	0.023592	0.178008	0	0	0.0359535	0.119888	0	0.0439994	0.00830387	0.00136579	0.00645763	0.0058408	0	0.00478581	0	0.0111628
GSM249751	0.137935	0.0789368	0.288824	0	0	0	0.114719	0.091903	0	0.0163706	0.0259414	0.0864515	0	0	0	0.0611814	0.0487374	0.0154621	0	0.0335376	0	0
GSM249752	0.113399	0.0678206	0.00672443	0.0380635	0.0452749	0	0.0341124	0.0833772	0	0.239504	0	0.0327385	0	0	0.0517803	0.0973689	0	0.0494879	0	0.118931	0	0.0214183
GSM249753	0.165503	0.10909	0.173576	0	0	0.00487938	0.145814	0.0714729	0	0	0	0.111926	0.0218459	0.0504561	0	0.0591609	0.0129947	0	0	0.0631863	0	0.0100946
GSM249754	0.00304769	0.16651	0.128246	0.0542796	0	0.125738	0.060894	0.054188	0	0.0473262	0	0.140058	0.027634	0	0	0.073439	0	0.0684783	0	0.048664	0	0.00149725
GSM249755	0.0658324	0.236057	0.024744	0.0183383	0	0.104087	0.110788	0.013142	0	0.104786	0	0.137263	0	0	0	0.0503682	0.0406364	0.0152696	0	0.0295077	0	0.0491806
GSM249756	0.162259	0.171406	0.107323	0.0016821	0	0	0.101512	0.0872121	0	0	0	0.0914205	0.00702319	0.0522403	0	0.0648489	0.00558452	0	0	0.139567	0	0.00792143
GSM249757	0.00383868	0.243868	0.190629	0.0102026	0	0.00359815	0.0242384	0.0648897	0	0	0	0.154335	0.003977	0	0	0.110551	0	0.0128529	0	0.150069	0	0.0269514
GSM249758	0.0576644	0.0844153	0.222985	0	0	0	0.105251	0.16231	0	0	0	0.13776	0.00734935	0.0926706	0	0.0841789	0	0.0205613	0	0.000202672	0	0.024652
GSM249759	0.105345	0.0632998	0.148559	0.00649606	0	0	0.237778	0.134016	0	0.030888	0	0.0543128	0.0228984	0.0242587	0	0.082231	0.00682535	0	0	0.0820542	0	0.00103642
GSM249760	0.258538	0.107422	0.0885216	0	0	0.0534914	0.0325163	0.0141356	0.0197174	0.085696	0	0.0133008	0.0294524	0	0.00850137	0.015134	0.0422461	0.0608386	0	0.129791	0	0.0406973
GSM249761	0.283137	0.197334	0.0825424	0	0	0.00365587	0.033258	0.0776387	0	0.112191	0	0.0509728	0.00894683	0.0358634	0	0.0371259	0.00720374	0	0.0417106	0.0161955	0	0.0122243
GSM249762	0.175561	0.122881	0.093426	0.00228872	0	0	0.0552466	0.136779	0	0.0357911	0.0421704	0.091631	0.00915102	0.120701	0	0.0365126	0.0640688	0.0137907	0	0	0	0
GSM249763	0.0721956	0.139455	0.146469	0	0.0227001	0	0.125728	0.137381	0	0	0	0.144045	0.0298946	0.0632327	0	0.0623331	0.00218431	0.0157701	0.0142799	0	0	0.0243324
GSM249764	0.119952	0.124985	0.202586	0	0.0116221	0	0.0723814	0.0231738	0	0.176823	0.0443248	0.0876695	0	0.0610398	0	0.0212127	0	0.0237172	0.00134085	0	0	0.0291719
GSM249765	0.0400659	0.127931	0.0766149	0.0723861	0.0129553	0	0.130511	0.0693276	0	0.0693335	0	0.136193	0	0	0	0.0700724	0.00259264	0.0415791	0	0.117095	0	0.0333427
GSM249766	0	0.140733	0.131054	0.0478742	0	0.0713803	0.0511174	0.00393797	0	0.0536096	0	0.168133	0.00541776	0	0	0.12318	0	0.0444578	0	0.142525	0	0.0165799
GSM249767	0.0299691	0.158793	0.220647	0.0424407	0	0.0600443	0.05375	0.0273508	0	0.105223	0	0.0726124	0.0174236	0	0	0.0982746	0.0223042	0.0564759	0	0	0	0.034691
GSM249768	0.0260039	0.147319	0.047889	0.00183755	0	0.0316376	0.138422	0.113804	0	0	0	0.0951834	0.00273667	0.0669361	0	0.0904094	0.195261	0.012711	0.00727149	0.0209812	0	0.0015972
GSM249769	0.298654	0.071278	0.0108128	0	0	0.111552	0.0858699	0	0	0.171375	0	0.0427737	0.0866004	0	0	0.0981679	0	0.0120548	0	0.0108619	0	0
GSM249770	0.0467818	0.0582072	0.0158382	0.054091	0	0.0909561	0.0454901	0.0358219	0	0.0193368	0	0.201252	0.0449845	0	0	0.13428	0	0.0794637	0	0.155258	0	0.0182383
GSM249771	0.0191951	0.053911	0.134979	0.00191221	0	0.00969011	0.0565407	0.192913	0	0.0711191	0	0.0611786	0	0.105099	0	0.0900914	0.0584405	0	0	0.138391	0	0.00653865
GSM249773	0.181782	0.191811	0.0125499	0	0	0.0332894	0.0494251	0.0533349	0	0.0878747	0	0.0422444	0.021719	0	0	0.0272066	0.114303	0.0158098	0	0.0966215	0	0.0720277
GSM249774	0	0.169529	0.276036	0.00206997	0	0.0498633	0.0324515	0.0192679	0	0.0344033	0	0.208678	0.0261144	0	0	0.063855	0	0.073495	0	0.0163609	0	0.0278761
GSM249775	0.131105	0.13559	0.124729	0.0164736	0	0.053563	0.0260617	0.0997509	0	0.0161134	0	0.114241	0.0910982	0	0	0.107307	0.0388075	0	0	0.0296088	0	0.0155512
GSM249776	0.182689	0.177776	0.0287809	0.000291914	0	0.0120625	0.0560599	0.117112	0	0	0	0.148162	0.0277914	0	0	0.10583	0	0.0335922	0	0.0949806	0	0.0148712
GSM249777	0.239247	0.210154	0.0992038	0	0	0.0659968	0.0376524	0	0	0.0277932	0	0.118557	0.0671722	0.0366324	0	0.0337062	0	0.0515231	0.0123612	0	0	0
GSM249778	0.26274	0.147002	0.120574	0	0	0	0.11796	0.072228	0	0	0	0.16746	0	0.0442483	0	0.0218723	0.00821623	0	0	0.0376987	0	0
GSM249779	0.111569	0.0305953	0.00850897	0.00431956	0	0	0.234138	0.169285	0	0.124994	0	0.0792438	0	0	0.00867973	0.0221045	0.0808779	0.0206507	0	0.0998476	0	0.00518586
GSM249780	0.54897	0.102712	0.0768972	0	0	0	0.0135248	0.0269194	0	0	0	0.0753667	0.0040893	0.0268562	0	0.0219709	0.0116025	0	0	0.0587534	0	0.0323379
GSM249781	0.00646247	0.118563	0.0425934	0.0241675	0	0.165918	0.108804	0.0436104	0	0.0987842	0	0.0600612	0.0285851	0	0	0.10638	0	0.0870752	0	0.0909843	0	0.0180115
GSM249782	0.238572	0.106119	0.113166	0	0.0407261	0	0.108899	0.135654	0	0.0519946	0	0.0769591	0	0.0185106	0	0.0506929	0.00408927	0	0	0.0423519	0	0.0122664
GSM249783	0.0928063	0.101736	0.0154742	0.0718767	0	0.0474295	0.0620402	0.0168657	0	0.189947	0	0.0199194	0.116609	0	0.0952755	0.0583028	0	0.0950383	0.0166802	0	0	0
GSM249784	0	0.455134	0.0874963	0.015235	0	0.0233682	0.0279119	0.0200636	0	0.108485	0	0.106394	0	0	0	0.0593564	0	0.0651744	0	0	0	0.0313814
GSM249785	0.0576381	0.184575	0.0116026	0.0837477	0	0.0422795	0.0689843	0.0344799	0	0.117168	0	0.167605	0.0143301	0	0.0570933	0	0	0.0839407	0.0470097	0	0.0295455	0
GSM249786	0.0209418	0.170735	0	0.022862	0	0.0324647	0.102981	0.12001	0	0.107908	0	0.028928	0.109617	0	0.0524369	0.0149388	0	0.144979	0	0.0476688	0	0.0235289
GSM249788	0.058843	0.15205	0.184899	0.0197705	0.0641913	0	0.135348	0.0726339	0	0.0261582	0	0.0777021	0.0721924	0	0	0.061889	0.00650967	0	0	0.0551754	0	0.0126379
GSM249789	0.386734	0.122848	0.0654852	0	0	0.035635	0.0948108	0.0325354	0	0.0216339	0	0.0838482	0.017781	0	0	0.0467536	0.0210818	0	0	0.0708525	0	0
GSM249790	0.115387	0.177685	0.0424805	0.0769754	0	0.127498	0.215786	0.0533438	0	0.0545568	0	0	0.031117	0.00321791	0.0610935	0	0.0371907	0	0	0	0.00366939	0
GSM249791	0.0928127	0.134929	0.0809608	0.0309006	0	0.107641	0.0394199	0.0335597	0.00133536	0	0	0.107533	0.0503402	0	0.00262989	0.0127183	0.254606	0	0	0.0503334	0	0.000279871
GSM249792	0.0834887	0.356174	0.0711387	0.00240909	0	0.000761555	0.0218708	0.0556403	0	0.0981661	0	0.102116	0	0	0	0.045196	0.0597247	0.00055934	0	0.0645618	0	0.0381928
GSM249793	0.298236	0.177968	0.148153	0	0	0.0534341	0.0161947	0.0452731	0	0.0440911	0	0.0507448	0.0272227	0	0	0.040249	0.0358354	0	0	0.0625984	0	0
GSM249794	0.0476956	0.0733065	0.0103546	0.00864439	0	0.0190537	0.0515788	0.096369	0	0.165844	0	0.069868	0.0259664	0	0	0.1377	0	0.0946415	0	0.171632	0	0.0273454
GSM249795	0.0901232	0.128651	0.217877	0.0112978	0.0249193	0	0.0973117	0.0369028	0	0.121572	0.0189373	0.0471612	0	0	0.0776502	0.0559762	0	0	0.0506977	0	0	0.0209227
GSM249796	0	0.19322	0.189441	0	0	0.102101	0.0753347	0.0605488	0	0.0653107	0	0.0685	0.0436035	0	0	0.0263876	0.0683876	0.0775966	0.00747517	0	0.0195293	0.00256369
GSM249797	0.115743	0.133593	0.0979638	0.013676	0	0.0514234	0.0746125	0.171513	0	0.0112535	0	0.0802242	0.0694584	0	0	0.0577894	0.000816697	0.0585518	0	0.045173	0	0.0182081
GSM249798	0.0639407	0.172551	0.0457654	0.0160592	0.00898507	0	0.0398711	0.0523021	0	0.0465463	0	0.130233	0.0223505	0	0	0.0861205	0.033034	0.0323109	0	0.243174	0	0.00675623
GSM249799	0	0.0991956	0.0402588	0.0762536	0	0.11598	0.0659119	0.0920975	0	0.0389899	0	0.0996706	0.074171	0	0	0.107431	0.0429509	0.0985194	0	0.0269124	0	0.0216569
GSM249800	0.106635	0.150028	0.196322	0	0.0228483	0	0.188042	0.043437	0	0.0161977	0	0.14793	0.0138094	0.0253794	0	0.0496495	0.0271877	0.00552873	0	0	0	0.00700557
GSM249801	0.0906123	0.176311	0.178086	0	0	0	0.0256446	0.217077	0	0	0	0.0727981	0.00489351	0.0511006	0	0.0272239	0.0507334	0	0	0.0994994	0	0.00602004
GSM249802	0.142103	0.0887993	0.17134	0	0.00725142	0	0.0813497	0.0029155	0	0	0	0.0855863	0.110149	0.0266352	0.0058601	0.0372459	0.0289573	0.0765332	0	0.101122	0	0.0341525
GSM249803	0.140592	0.092482	0.156811	0.012379	0.0538386	0	0.116192	0.0514989	0	0	0	0.163101	0.0057453	0	0	0.0594376	0.0109847	0.0129615	0	0.105588	0	0.0183884
GSM249804	0.00228004	0.113288	0.041538	0.0115471	0	0.0389927	0.0215127	0.0800162	0	0.0396276	0	0.106066	0.0250233	0	0	0.118018	0.00506017	0.0594723	0	0.311928	0	0.025629
GSM249805	0.0920454	0.246272	0.194226	0.0186227	0.0168752	0	0.0825059	0.0143621	0	0.00872067	0	0.156981	0	0.0159913	0	0.0457145	0.00090537	0.0101364	0	0.0154692	0	0.0811723
GSM249806	0.0190874	0.300989	0.0577238	0.0470085	0	0.0749549	0.0399175	0.0385331	0	0.0869831	0	0.0850817	0	0.0161556	0.00563086	0.000463052	0.0674753	0.0239552	0	0.117129	0	0.0189121
GSM249807	0.0156607	0.189625	0.193309	0.0650679	0.0350067	0	0.125442	0.028566	0	0.0430794	0.00570407	0.143109	0	0.0196731	0	0.0255975	0.022593	0.0123689	0	0.0303285	0	0.0448693
GSM249808	0.0700006	0.172259	0.162176	0	0.0421402	0	0.0994484	0.11434	0	0	0	0.148157	0.0506702	0.00664808	0	0.0635398	0.00819694	0	0	0.0503342	0	0.0120898
GSM249809	0.265873	0.197496	0.0871069	0	0.0018855	0	0.025608	0.0745638	0	0.0417493	0	0.048324	0	0	0	0.0459346	0.103413	0.0259434	0	0.0744467	0	0.00765595
GSM249810	0.0465152	0.149893	0.180461	0.0274306	0	0.0961128	0.0612052	0.0914304	0	0.0971968	0	0.0411199	0.0575313	0.00359629	0	0.0626981	0.0608688	0	0.00520866	0.0187322	0	0
GSM249811	0.261461	0.172002	0.0853637	0	0	0.00378996	0.0241502	0.0358755	0	0.0867272	0	0.0748032	0	0	0	0.0368949	0.0246687	0.0913119	0	0.0665445	0	0.0364077
GSM249812	0.135021	0.0237381	0.0330846	0.0870027	0	0.0953245	0.102165	0.220568	0	0	0	0.0829678	0.0731212	0	0	0.112656	0	0	0	0	0.0343509	0
GSM249813	0.0773648	0.1517	0.294561	0.0134278	0	0.0268429	0.0410347	0.142943	0	0	0	0.108054	0.0175011	0.00132196	0.0108621	0.00330783	0.00831181	0.0250921	0	0.0318639	0	0.0458116
GSM249814	0.0146918	0.186126	0.157228	0.0281706	0.029313	0.0117209	0.0398108	0.0802674	0	0.0608092	0.110686	0.0849735	0	0.111899	0	0.0326864	0	0.0184986	0	0.0140259	0	0.0190932
GSM249815	0	0.122071	0.267083	0.0776496	0.0242351	0	0.0405515	0.0893277	0	0.0918932	0.0142132	0.0936599	0	0.0209135	0	0.0655757	0.00414817	0.0379861	0	0.0270792	0	0.023613
GSM249816	0.041597	0.162896	0.126484	0.0307972	0	0.0750016	0.177523	0.092299	0	0.0255801	0	0.0600929	0.0165828	0	0	0.0201757	0	0.0443835	0	0.0795381	0	0.0470494
GSM249817	0.182165	0.227972	0.100282	0.0107282	0	0.00739254	0.022543	0.0828884	0	0.184589	0	0	0.0255017	0.000707401	0	0.0251775	0.0363596	0	0	0.0682511	0	0.0254422
GSM249818	0.0882064	0.185025	0.181632	0.0195288	0	0.0422675	0.111009	0.0960111	0	0	0	0.128164	0.0413749	0.0083429	0	0.0387756	0.0135796	0.0297228	0	0.0163608	0	0
GSM249819	0.403274	0.0336882	0.0223327	0	0	0.0452218	0.0332801	0.066104	0	0.0344198	0	0.0612585	0.0389982	0	0	0.0579511	0.00434332	0.0426414	0	0.145066	0	0.0114207
GSM249820	0	0.289061	0.230057	0.0105841	0	0.0104817	0.0445767	0.0715597	0	0.0580933	0.000660701	0.0812683	0	0.0402821	0	0.011048	0	0.048522	0.0128414	0	0	0.0909636
GSM249821	0.0237367	0.23376	0.114757	0	0.0397198	0	0.0818529	0.066239	0	0.201398	0	0.0649168	0	0.0176888	0	0.0272017	0.0111331	0.00770274	0	0.0535839	0	0.0563094
GSM249822	0.189463	0.156948	0.0950004	0.0183997	0	0.0101644	0.038616	0.0402736	0	0.094018	0	0.12175	0.0212131	0.00452973	0	0	0.147993	0	0	0.0591327	0	0.0024985
GSM249823	0.00177774	0.143057	0.188838	0.102577	0.134391	0	0.0569812	0.0146244	0	0.0851556	0.0389543	0.0677872	0	0.0623536	0	0.00900126	0	0.0100841	0	0.0322784	0.0132962	0.0388431
GSM249824	0.183719	0.150807	0.0137884	0.0374232	0.0287093	0	0.0391283	0.115762	0	0	0	0.175529	0	0	0	0.125731	0.00479362	0	0	0.105791	0	0.018819
GSM249825	0.0429458	0.230702	0.210593	0.00469969	0.0358003	0	0.0847091	0.110219	0	0	0	0.103647	0.0051624	0.0193638	0	0.0656179	0	0.0428732	0	0.0150444	0	0.0286218
GSM249826	0.21964	0.141644	0.0127944	0.0937233	0	0.0397239	0.0317948	0.0196906	0	0	0	0.12304	0	0	0	0.0928588	0.0778196	0.0195313	0	0.105903	0	0.0218368
GSM249827	0.0339991	0.0594724	0.0186188	0.0984762	0.0147182	0	0.0415554	0.073971	0	0.202607	0	0.0526326	0.0694033	0	0	0.111286	0.00142039	0.0516637	0	0.117309	0	0.0528675
GSM249828	0.0539962	0.229538	0.107374	0.0139467	0	0.0900374	0.0857973	0.0304245	0	0.0752824	0	0.0901065	0.0166264	0.0149951	0.0308153	0	0.0295272	0.0429738	0	0.0756299	0	0.0129292
GSM249829	0.22798	0.159064	0.0936681	0.000860419	0	0.00745788	0.0347185	0.0818627	0	0.12648	0	0.0520173	0.00276524	0.0128267	0	0.039513	0.0202016	0	0	0.140585	0	0
GSM249830	0	0.145336	0.134018	0.0151303	0	0	0.117242	0.195867	0	0.00563822	0	0.106773	0.0139147	0.0854401	0	0.0609483	0.10926	0	0	0.0104319	0	0
GSM249831	0.120378	0.126307	0.203139	0.0157458	0.0341714	0	0.186873	0.0644864	0.0038171	0	0.0106766	0.0637484	0	0.00382745	0	0.0836401	0.0291322	0.0114418	0	0.0287167	0	0.0138983
GSM249832	0.00759536	0.206679	0.0143429	0.0111942	0	0.0322773	0.0246756	0.0243464	0	0.0333715	0	0.129227	0.0011358	0	0	0.0981749	0	0.178743	0	0.213569	0	0.0246677
GSM249833	0.138259	0.139935	0.126672	0.00558405	0	0	0.124203	0.192071	0	0	0	0.1174	0	0	0	0.0671279	0.022952	0	0	0.0587461	0	0.00705031
GSM249834	0.0479473	0.128381	0.0882795	0.0346544	0	0	0.17379	0.227796	0	0.0247058	0	0.0781885	0.0589735	0	0	0.0789691	0.0301701	0	0.0194993	0	0	0.00864493
GSM249835	0.173268	0.148951	0.173064	0.00903577	0	0.02705	0.0868171	0.074537	0	0.0316834	0	0.0829984	0.00844167	0.00688112	0	0.0377115	0.0484597	0.0111998	0	0.0712782	0	0.0086234
GSM249836	0.23427	0.200105	0.113206	0	0	0.0272576	0.0255804	0.0455505	0	0.018162	0	0.0717349	0.0183997	0.027255	0	0.0638014	0.0220369	0.0584164	0	0.0457649	0	0.02846
GSM249837	0.055246	0.238476	0.125143	0.0345442	0	0.0240585	0.0580953	0.0624433	0	0	0	0.13365	0.00565202	0	0	0.102311	0.0841732	0.0212879	0	0.0446264	0	0.010293
GSM249838	0.11344	0.140092	0.131731	0	0	0.0421649	0.0478942	0.0642082	0	0.199703	0	0.0443014	0	0	0	0.0961415	0.0443439	0.0141728	0	0.0393067	0	0.0225007
GSM249839	0.0367906	0.241417	0.00167729	0	0.0318955	0	0.122983	0.0079066	0	0.110271	0	0.130458	0.098987	0	0.0370102	0.0188454	0	0.110071	0	0.00489561	0	0.046792
GSM249840	0.0279288	0.114523	0.145747	0.0158611	0.112609	0	0.0480002	0.0979451	0	0.0362812	0.021106	0.115108	0.0290489	0.164119	0	0	0.043557	0	0	0.0222336	0	0.00593217
GSM249841	0	0.143194	0.0478308	0.0639254	0	0.0741513	0.109662	0.132254	0	0	0	0.0961965	0.0290323	0	0	0.0737929	0	0.0382749	0	0.191685	0	0
GSM249842	0.179852	0.088412	0.116782	0	0	0	0.201833	0.170246	0	0	0	0.0642234	0.00920486	0.0416047	0	0.0492724	0.0554342	0	0	0.0227694	0.000365926	0
GSM249843	0.108798	0.103734	0.0833015	0.0431052	0.0248274	0.0381304	0.116251	0	0.0928961	0.014552	0.038722	0.02316	0	0.0479873	0.00183788	0	0.0440559	0.0115109	0	0.13995	0	0.0671799
GSM249844	0.153283	0.186362	0.0420978	0.0121337	0	0.0538484	0.194779	0.019462	0	0.105573	0	0.00686726	0.0670205	0	0.0499464	0.0680551	0.0159084	0	0	0.0165214	0	0.00814091
GSM249845	0.0517277	0.24192	0.132568	0	0	0	0.0966203	0.0760393	0	0.0925577	0	0.098626	0.029273	0	0	0.0466225	0.0254612	0.00833029	0.011692	0.0149206	0	0.0736417
GSM249846	0.181059	0.129642	0.133488	0	0	0.000137049	0.0361725	0.154891	0	0.0587596	0	0.0689553	0	0.160315	0	0.0191458	0.0079324	0	0	0.0353467	0	0.0141549
GSM249847	0.0789009	0.0533921	0.0575576	0.00623284	0	0.104504	0.117847	0.106663	0	0.0021502	0	0.175292	0.0121228	0	0	0.0210947	0	0.127681	0	0.0748319	0	0.0617307
GSM249848	0.242245	0.141922	0.188393	0.0201102	0	0.0187171	0.0379641	0.156175	0	0.0496877	0	0.0628241	0.0166718	0	0.00182209	0.0125293	0.00520217	0	0	0.038588	0	0.00714815
GSM249849	0.0510012	0.111205	0.292105	0.0101905	0	0.00330685	0.0618614	0.165808	0	0.0176318	0.00779079	0.15667	0.0101768	0.000642432	0	0	0.0350994	0.0261047	0	0.048782	0	0.00162455
GSM249850	0.158779	0.128244	0	0	0	0.0602532	0.0674946	0.166193	0	0	0	0.130236	0.0679481	0	0	0.133417	0	0.0797748	0	0	0	0.00766034
GSM249851	0.0739585	0.140918	0.150797	0	0	0.0846634	0.0981764	0.0584366	0	0	0	0.148619	0.020526	0.0267878	0	0.0857823	0	0.0406285	0	0.0493779	0	0.0213278
GSM249852	0.0117854	0.141075	0.227582	0.0217504	0	0.000549673	0.0534025	0.163896	0	0	0.0257541	0.107187	0.00537629	0.0575056	0	0.0602669	0.0624655	0.00585013	0	0.035386	0	0.0201682
GSM249853	0.15147	0.0730777	0.12709	0.0354129	0	0	0.0416337	0.0689357	0	0.0672167	0.0186377	0.0694406	0	0.243621	0	0.00336635	0	0	0	0.0799217	0	0.0201768
GSM249854	0	0.157246	0.111985	0.0740612	0.075362	0	0.0293658	0.00297089	0	0.0144289	0.0134008	0.139925	0	0.122643	0	0.0823501	0	0	0	0.108932	0	0.0673299
GSM249855	0.117448	0.0940098	0.035283	0.128607	0	0.0417147	0.0646292	0.168775	0.010748	0.00771723	0	0.023344	0.0765788	0	0.0575206	0.0505121	0.0388447	0	0.0659976	0	0.0182705	0
GSM249856	0	0.420068	0.0639517	0.0233261	0.00342827	0	0.0255735	0.0813054	0	0.0976634	0	0.0914595	0.00577747	0	0	0.0979493	0.00744701	0.0303493	0.00569386	0	0	0.0460072
GSM249857	0	0.154922	0.0336994	0.0767932	0	0.114611	0.0452662	0.0933079	0	0.116085	0	0.0876507	0.0443206	0	0	0.0777667	0	0.0783808	0.0771972	0	0	0
GSM249858	0.186572	0.289533	0.0952721	0	0	0	0.0186863	0.145821	0	0	0	0.0771915	0.0273748	0.0645617	0	0.0352828	0.0257818	0	0.00546153	0.0284606	0	0
GSM249859	0.0587374	0.151874	0.203077	0.0305285	0	0.0362682	0.047151	0.0485819	0	0.0944141	0	0.0521208	0.0387595	0	0	0.072711	0.0555641	0	0	0.0824066	0.00163601	0.0261698
GSM249860	0.152536	0.15145	0.269867	0	0	0	0.0238182	0.152791	0	0.0340704	0.0154794	0.0406772	0	0.0470426	0	0.024605	0.0283442	0	0.0431321	0	0	0.0161867
GSM249861	0.000287624	0.134272	0.0230118	0.00618881	0	0.142437	0.0651496	0.0884619	0	0.16212	0	0.0716461	0.0871297	0	0.0832502	0.0241065	0	0.0493161	0	0.0325275	0	0.0300952
GSM249862	0.25832	0.195339	0.171895	0	0	0	0.0364342	0.0834827	0	0.0204631	0	0.103012	0	0.026923	0	0.0450166	0.0275642	0	0	0.0279513	0	0.00359909
GSM249863	0	0.228701	0.112809	0.00926751	0	0.0572	0.0877543	0.0526706	0	0.150728	0	0.0304855	0	0.0882507	0	0.0496439	0	0.0558825	0	0.0562526	0	0.0203538
GSM249864	0	0.214254	0.0585638	0.0554383	0	0.000569717	0.104701	0.244868	0	0.0703444	0	0.0525521	0.0518734	0	0	0.0763381	0	0.012292	0	0.0582046	0	0
GSM249865	0	0.233614	0.214601	0.0203391	0.0167768	0	0.0516497	0.127218	0	0.100517	0	0.0567047	0.00588618	0.0124756	0	0.094354	0	0.0165395	0	0.0327071	0	0.0166175
GSM249866	0	0.169403	0.0347788	0.0642124	0	0.0975364	0.0496268	0.102008	0	0.0783282	0	0.0365743	0.0903729	0	0	0.103702	0.0468688	0.0507272	0	0.0654898	0	0.0103713
GSM249867	0.116547	0.13922	0.13922	0.0415181	0	0.0030357	0.0596993	0.0975752	0	0.0196681	0	0.077855	0.010675	0	0	0.0697217	0.103529	0.00473716	0	0.099776	0	0.0172228
GSM249868	0.227414	0.167786	0.00391205	0.0738512	0	0.0464341	0.0511727	0.0782977	0	0.0490705	0	0.0309735	0.086545	0	0.0685685	0	0.0133491	0.00935917	0	0.0808878	0	0.0123781
GSM249869	0.15479	0.172592	0.0252785	0.0513206	0.0343347	0	0.0391969	0.0970273	0	0.15272	0	0.00231615	0.0924523	0	0.00354061	0.0614311	0.00484401	0	0.0770033	0	0	0.0311525
GSM249870	0.0669889	0.139358	0.012307	0.0266998	0.0193587	0	0.0340785	0.0699342	0	0	0	0.288711	0	0	0	0.12505	0.0411452	0.0738753	0	0.0728653	0	0.0296285
GSM249871	0.0492508	0.139758	0.203651	0	0	0	0.182303	0.126701	0	0	0	0.107967	0	0.0482484	0	0.0564158	0.0380879	0.0112095	0	0.0291258	0	0.0072818
GSM249872	0.0652344	0.106999	0.0984063	0.0280382	0.00928062	0	0.060138	0.0875305	0	0.1688	0	0.0322413	0	0.0142345	0	0.0822583	0	0.0123692	0	0.198548	0	0.0359223
GSM249873	0.107284	0.192523	0.116101	0.0398088	0	0.0348826	0.039043	0.0478661	0	0.113294	0	0.0837258	0	0	0.0160699	0.0872971	0	0.0902208	0	0.0120754	0	0.0198095
GSM249874	0.0991604	0.121645	0.174485	0.0315131	0	0	0.0417928	0.199135	0	0	0.0650484	0.0545173	0.0157019	0	0	0.0687756	0.0362672	0	0	0.0823011	0	0.00965723
GSM249875	0.163395	0.127164	0.0764281	0.0100252	0	0.0178897	0.143697	0.0207762	0	0.129569	0	0.0462079	0.127263	0	0.00967677	0.0109231	0.00478316	0.0210741	0	0.0725464	0	0.0185828
GSM249876	0	0.161982	0.0908433	0	0	0	0.0483163	0.156567	0	0.0432534	0	0.067395	0.00133847	0.104604	0	0.0993105	0.0517264	0.0175362	0	0.118658	0.000972393	0.0374978
GSM249877	0.0904244	0.118155	0.150142	0	0.01468	0	0.276721	0.090332	0	0.014576	0.00218706	0.0565302	0.0199177	0.0261201	0	0.0304253	0.00894181	0	0	0.0877536	0	0.0130935
GSM249878	0.0770695	0.221001	0.12223	0.066405	0	0.0101257	0.00882113	0.0725533	0	0.00734354	0	0.112541	0.00560341	0	0	0.0512325	0	0.0541825	0	0.158791	0	0.0321004
GSM249879	0	0.241912	0.197937	0.0239819	0	0.0434264	0.0376246	0.105013	0	0.0309909	0	0.145853	0.0327897	0	0	0.082407	0.021073	0	0	0.0160918	0	0.0208997
GSM249880	0	0.349428	0.228843	0.00817732	0	0.00184533	0.0298986	0.0626665	0	0.00727709	0	0.157931	0.0229424	0	0	0.0468859	0.0326489	0.0314853	0.00218098	0	0	0.0177899
GSM249881	0.0983036	0.0567906	0	0.0313541	0	0.0850794	0.0489653	0.117691	0	0	0	0.261122	0	0	0	0.108132	0.0145321	0.0214373	0	0.156593	0	0
GSM249882	0.0395521	0.0662115	0.00550511	0.0362568	0	0.0327574	0.0288313	0.0676277	0	0.0202258	0	0.138257	0.00624664	0	0	0.115728	0	0.0414958	0	0.386761	0.0127853	0.00175805
GSM249883	0.0119175	0.168588	0.229662	0	0	0.0182627	0.188613	0.0702504	0	0	0	0.16538	0.034228	0.00508002	0	0.0287684	0.0301507	0.00790362	0	0.0172326	0	0.0239637
GSM249884	0.00729169	0.108659	0.163021	0.0104647	0.0156108	0.0179592	0.0841642	0.147853	0	0.0862052	0	0.0771356	0.0138879	0	0	0.120256	0.0153695	0.0140147	0	0.0895061	0	0.0286012
GSM249885	0.262887	0.242569	0.141506	0.00243278	0	0.020129	0.0224506	0.0937069	0	0.0114431	0	0.0680763	0.0312386	0	0	0.0107941	0	0.0151689	0	0.0573224	0	0.0202743
GSM249886	0.514528	0.0910709	0.0205529	0	0.0299338	0	0.0284235	0	0	0.0321959	0	0.0801248	0.0376551	0.040416	0	0.000243698	0	0.00784517	0	0.11701	0	0
GSM249887	0	0.281995	0.19436	0.0217312	0.0135264	0.0665934	0.0412672	0.0981249	0	0.0631852	0.00311237	0.10071	0	0.00120335	0	0.0453773	0.0182377	0.0164506	0	0.0146596	0	0.019466
GSM249888	0.0818622	0.161768	0.186619	0	0	0	0.0306269	0.0216112	0	0.206779	0	0.0711761	0	0.203461	0	0	0.0107143	0	0.0119666	0	0	0.013416
GSM249889	0.187431	0.143347	0.146111	0.0198501	0	0.0106645	0.0384982	0.149495	0	0.02166	0.0102453	0.0670844	0	0.0772096	0	0.043187	0.0177113	0	0	0.0675055	0	0
GSM249890	0.107575	0.0844259	0.216789	0.0932349	0	0.0386631	0.0623792	0.0421512	0	0.118084	0	0.0717798	0.00885916	0	0.0177936	0.0185896	0.050285	0.0238575	0.0225695	0	0.0143698	0.00859384
GSM249891	0.221508	0.0728261	0.128122	0.0122205	0.00255336	0	0.0591792	0.103274	0	0.0219554	0	0.0968753	0.0110179	0	0	0.124386	0	0.0381507	0	0.089835	0	0.0180969
GSM249892	0	0.277071	0.0266076	0.0296743	0	0.0273266	0.0545219	0	0	0.183943	0	0	0.0285625	0.0906393	0	0.171388	0.0194557	0	0.0908104	0	0	0
GSM249893	0.313295	0.144998	0.132533	0	0	0.0246401	0.0489255	0.113339	0	0.0547536	0	0.0815934	0.0107185	0.0326743	0	0.011795	0.0223125	0	0	0.0071756	0	0.00124689
GSM249894	0.0935354	0.0248345	0.123134	0	0	0.0568171	0.0724084	0.144562	0	0	0	0.127906	0.0728558	0	0	0.166874	0.0487644	0.0395605	0	0.0180633	0	0.0106844
GSM249895	0.241638	0.156822	0.0526464	0.0450128	0	0.045063	0.0494598	0.0507806	0	0.110715	0	0.0348531	0.0390605	0	0.0299071	0	0.0692758	0	0	0.0350841	0	0.0396827
GSM249896	0.279684	0.149831	0.065492	0	0	0.0275019	0.0405018	0.117475	0	0.169265	0	0.0264731	0.0153528	0	0	0.0124593	0	0.025734	0	0.0286013	0	0.041629
GSM249897	0	0.364166	0.134334	0.0119726	0	0.0370903	0.0400347	0.0625437	0	0.068524	0	0.105669	0.0305492	0	0	0.0298523	0.00217548	0	0	0.0728717	0	0.0402164
GSM249898	0.0449257	0.152886	0.0250392	0.0123286	0	0.0195146	0.123962	0.162223	0	0.0590336	0	0.139255	0.0909065	0	0	0.0706065	0.0148779	0.0215454	0.0523302	0	0	0.0105655
GSM249899	0.11203	0.283552	0.10958	0.0188841	0.0120183	0	0.0317231	0.0838537	0	0	0.000193205	0.0925724	0.0619683	0	0	0.0888401	0.00479424	0.0696052	0	0.0151368	0	0.0152495
GSM249900	0.108732	0.0682229	0.181933	0.0097686	0.0222849	0	0.127967	0.15793	0	0	0.0191186	0.144524	0.0141858	0.0346561	0	0.0421993	0	0.0157188	0	0.0421974	0	0.0105628
GSM249901	0.0322195	0.0811269	0.10618	0.0164053	0	0	0.192457	0.128857	0	0.0111403	0.0118471	0.0444632	0.0955649	0.0802034	0	0.0475737	0.0564281	0	0	0.0873253	0	0.00820843
GSM249902	0.0795124	0.170151	0.00945308	0.0433974	0	0.0485105	0.0927671	0.0982931	0	0.0780795	0	0.0616678	0.041176	0	0.00560755	0.0340182	0	0	0	0.237366	0	0
GSM249903	0.13518	0.118834	0.211335	0	0	0.0470898	0.115213	0.0584554	0	0.0265169	0	0.0930861	0	0	0	0.0398756	0.0172137	0.0626496	0	0.0550249	0	0.0195258
GSM249904	0.0284109	0.230849	0.203672	0.0640527	0	0.0475643	0.0599732	0	0	0.0357845	0	0.0769788	0.0336718	0	0.0258236	0.0624337	0.000175404	0.0849131	0	0.0313665	0	0.0143308
GSM249905	0.0551115	0.201872	0.0979476	0	0	0.044232	0.0278956	0.113782	0	0	0	0.160309	0.0541897	0	0	0.0809338	0	0.0917782	0	0.0551868	0	0.0167613
GSM249906	0	0.19182	0.0616727	0.00936553	0	0.0389174	0.0511536	0.172407	0	0.106643	0	0.0611937	0	0.104648	0	0.0749682	0.0473802	0	0	0.0651178	0	0.0147134
GSM249907	0	0.152188	0.222029	0.0752685	0	0.0211481	0.0387196	0.0512644	0	0.0589786	0	0.0893889	0.0106516	0	0	0.0788774	0.0325154	0.0566841	0	0.0392347	0	0.0730513
GSM249908	0.203451	0.136965	0.104846	0	0	0.0175765	0.028904	0.108938	0	0.0275898	0	0.0586611	0.0444807	0	0.0250828	0	0.0440403	0.0702346	0	0.0976922	0	0.0315387
GSM249909	0.0258463	0.119892	0.0516713	0.0214458	0	0.100602	0.218509	0.0586964	0	0	0	0.174847	0.0337804	0.0283751	0	0.0855076	0.0125117	0.0253276	0	0.0283019	0	0.0146863
GSM249910	0.162593	0.123924	0.00531586	0.273607	0	0.00523232	0.0254702	0.0803165	0	0.0291961	0	0.00247371	0.028383	0	0	0.0438247	0.164634	0.00343962	0	0.0515895	0	0
GSM249911	0.238641	0.173027	0.178616	4.94e-05	0.0393879	0	0.0816461	0.105957	0	0.00562452	0	0.0484662	0.0146284	0	0	0.0252257	0	0.0262421	0.0121588	0.0340612	0	0.0162681
GSM249912	0.227466	0.0993074	0.148	0	0	0.0185695	0.127445	0.08749	0	0	0	0.124079	0.0349918	0	0	0.0533347	0.0326678	0	0	0.0353946	0	0.0112538
GSM249913	0.321415	0.143822	0.0776964	0	0	0.0765468	0.0542875	0.052368	0	0	0.00381199	0.0935532	0.0398168	0.000935414	0.00834423	0.00479423	0.0198322	0	0	0.0793451	0.00208059	0.0213504
GSM249914	0.0344493	0.0869915	0.111168	0.00184034	0.0494356	0	0.170398	0.241218	0	0.0112466	0	0.0349286	0.0166092	0.0277914	0	0.100489	0.0353825	0	0	0.0605256	0	0.0175262
GSM249915	0.0623148	0.132683	0.241535	0	0	0.0460974	0.0395598	0.0407213	0	0.0322954	0	0.141885	0.011472	0.029507	0	0.0515661	0	0.019846	0	0.142533	0	0.00798428
GSM249916	0.164221	0.0313919	0.017825	0.0546486	0	0.057923	0.0909678	0.124029	0	0.0599007	0	0.149164	0.0678546	0	0	0.133303	0	0.0487716	0	0	0	0
GSM249917	0.223893	0.227374	0.141605	0.0293249	0	0.0418431	0.0597574	0.0502331	0	0.0742193	0	0.0734633	0.00100842	0.0251841	0.00423943	0	0.00383483	0	0	0.0430142	0	0.00100666
GSM249918	0.0830775	0.154738	0.00270837	0.0353524	0	0.070472	0.0882156	0.109922	0	0.134763	0	0.0376495	0.0844543	0	0	0.110319	0	0.0203034	0.0336318	0	0	0.0343921
GSM249919	0.0296228	0.191736	0.109207	0.017712	0	0.0600741	0.0528403	0.131182	0	0.0548097	0	0.0824268	0.0108058	0	0	0.103821	0	0.0365736	0	0.0803261	0	0.0388628
GSM249920	0.0411478	0.111555	0.0398934	0.0374016	0	0.0875313	0.0826299	0	0	0.233791	0	0	0.0885902	0	0	0.12011	0	0.114411	0	0.0429391	0	0
GSM249921	0	0.429537	0.0951165	0.020583	0.00441716	0.0231711	0.0198955	0.109717	0	0	0	0.0887177	0.0424305	0	0	0.0206843	0.0411836	0.00881861	0	0.059646	0	0.0360823
GSM249922	0.010154	0.035777	0.104913	0.043844	0	0	0.127597	0.0654314	0	0.161579	0	0.0481616	0.0255997	0	0	0.091411	0.122843	0.0623742	0	0.08932	0.000839546	0.010155
GSM249923	0.00426475	0.204074	0.097259	0.00300974	0	0.0482808	0.0989871	0.082254	0	0.087947	0	0.00240348	0.0179496	0	0	0.0755596	0	0.0917682	0	0.0353168	0	0.150926
GSM249924	0	0.150459	0.141807	0.0148666	0.0727606	0	0.102069	0.111618	0	0	0	0.143248	0.0113408	0.0181983	0	0.0440306	0	0.0453426	0	0.128724	0	0.015536
GSM249925	0	0.179199	0.112532	0.00239386	0.0482187	0	0.103396	0.101609	0	0.0782313	0	0.0981329	0.0121055	0.0541887	0	0.053404	0.0334417	0	0	0.097741	0	0.0254072
GSM249926	0	0.248735	0.253502	0.0261737	0	0	0.0560781	0.136927	0	0.0220036	0.0101562	0.112772	0.00974079	0	0	0.0593789	0.0043759	0.0238409	0	0.0160592	0	0.0202574
GSM249927	0.265419	0.0825795	0.064541	0.0902984	0.000486742	0	0.0206624	0	0	0.065149	0	0.074929	0.0119271	0	0.0227053	0.00508185	0	0.106421	0	0.0689743	0	0.120826
GSM249928	0.0292858	0.13138	0	0	0.00731072	0	0.0961855	0.0168738	0	0.24534	0	0.0138557	0.0654306	0	0.09332	0	0	0.140035	0	0.0648413	0	0.0961413
GSM249929	0.321076	0.055861	0.0123416	0	0	0.0427457	0.0321474	0.0498813	0	0.0661511	0	0.0470967	0.0309365	0	0	0.117155	0	0.0247749	0	0.197336	0	0.00249682
GSM249930	0.123817	0.0670212	0.119524	0.00731645	0	0.0126008	0.211593	0.0510661	0	0	0	0.159019	0.0269295	0.0813501	0	0.0438476	0	0.0643252	0.031591	0	0	0
GSM249931	0	0.162147	0.0388769	0	0	0.0143714	0.054683	0.108151	0	0.221781	0	0.0572608	0	0.0567712	0	0.108893	0.0248642	0.0144789	0	0.0910023	0	0.0467194
GSM249932	0	0.302603	0.047929	0.0349734	0	0.0208491	0.0354534	0.0378392	0	0.173076	0	0.0774435	0.00956256	0	0	0.090121	0.0251864	0.0716816	0	0.0291305	0	0.0441511
GSM249933	0.056446	0.194712	0.166196	0	0.0261536	0	0.0726598	0.104406	0	0.0220943	0	0.135347	0	0.0645038	0	0.0977343	0.00268508	0.0123215	0	0.0301457	0	0.0145953
GSM249934	0	0.141029	0.111682	0.0227543	0	0.105079	0.0757755	0.0571591	0	0.029637	0	0.156363	0.031096	0	0	0.0724578	0	0.177641	0	0.00943128	0	0.00989455
GSM249935	0.0289545	0.110456	0.110087	0.0277752	0	0	0.30555	0.0722043	0	0.034209	0	0.0324729	0.0547517	0	0	0.0488896	0.0374072	0.0533405	0.0598816	0	0	0.0240199
GSM249936	0.0361377	0.0967483	0.153104	0.016664	0	0.114026	0.078288	0.0273691	0	0	0	0.148998	0.0271199	0.0211938	0	0.0642184	0.0307411	0.0253616	0	0.1525	0.00753032	0
GSM249937	0.0332863	0.19669	0	0	0.0524283	0	0.0684402	0.199788	0	0.0380388	0	0.0242077	0.182209	0	0.0548452	0	0	0.150067	0	0	0	0
GSM249938	0.244113	0.103873	0.160683	0.00285603	0	0.032977	0.0995077	0.106978	0	0	0.0588528	0.0675127	0	0	0	0.0477182	0.0216133	0	0	0.0378947	0	0.0154204
GSM249939	0	0.236695	0.105281	0.0146687	0	0.0491532	0.0311381	0.0775901	0	0.00186204	0	0.139855	0.0159359	0	0	0.0943052	0	0.0401215	0	0.159833	0	0.0335613
GSM249940	0	0.269373	0.0310086	0.0803069	0	0.0690906	0.0643781	0	0	0.18178	0	0.0706902	0.0461253	0	0	0.0985978	0	0.0692187	0	0.0182968	0	0.00113428
GSM249941	0.13745	0.106831	0.110451	0	0	0.0991835	0.0654663	0.0606461	0	0	0	0.230712	0	0	0	0.065351	0.013039	0.0716567	0	0.0246164	0	0.0145967
GSM249942	0.124141	0.240989	0.0159206	0	0	0.0948304	0.0874015	0	0	0.126612	0	0.0967926	0.0612829	0	0.00568818	0.0733933	0	0.0277451	0.0212299	0	0	0.0239733
GSM249943	0	0.159783	0.147559	0.0073556	0	0	0.11441	0.0410585	0	0.0750825	0	0.0699918	0.0173515	0	0	0.153784	0.062402	0.0240291	0	0.111061	0	0.0161329
GSM249944	0	0.190659	0.131645	0.0301277	0	0	0.114497	0.227928	0	0	0	0.11401	0.023697	0.0127321	0	0.0560376	0	0.03758	0	0.0344099	0	0.0266774
GSM249945	0.105608	0.300975	0.0699152	0	0.0169207	0	0.100624	0.0755672	0	0.0170619	0	0.0731695	0.0283624	0.0617814	0	0.0948396	0	0.0039897	0	0.0277254	0	0.02346
GSM249946	0.285731	0.165479	0.0758843	1.29e-05	0	0.0138929	0.0146537	0.0543638	0	0.120209	0	0.0281287	0	0	0	0.0811173	0.0326631	0	0	0.112238	0	0.0156267
GSM249947	0.113786	0.115677	0.172597	0	0	0.0400986	0.0683385	0.107498	0	0.0403598	0	0.132943	0.0128523	0.0246683	0	0.0535869	0.0135722	0	0	0.0947448	0	0.00927735
GSM249948	0.225788	0.0853019	0.100141	0.00122256	0	0.0053516	0.219678	0.0539664	0	0.105293	0.0412994	0.0429561	0.0100803	0.0652823	0.00054761	0	0.0296409	0	0	0.0134508	0	0
GSM249949	0.172462	0.121557	0.181177	0	0.00857098	0	0.0235098	0.162308	0	0	0.00988818	0.104818	0.0120531	0.0545861	0	0.0586549	0.0511363	0	0	0.0366988	0	0.00257974
GSM249950	0.242776	0.100497	0.12562	0	0.00128736	0	0.0699039	0.0346612	0	0.0544282	0	0.141866	0	0.0299618	0	0.0334226	0	0.0229286	0	0.110822	0	0.0318256
GSM249951	0	0.261695	0.217103	0.0177499	0	0.0254505	0.0751418	0.0617984	0	0.117105	0	0.0443614	0.0187351	0	0	0.0672247	0.0417271	0	0.0153821	0	0	0.0365273
GSM249953	0.14971	0.0933779	0.0141109	0	0	0.153805	0.109294	0.0161622	0	0.0931238	0	0.12258	0.0429765	0	0	0.079892	0	0.0946671	0	0.0208225	0	0.00947753
GSM249954	0.247395	0.295514	0.126559	0.0326489	0	0.0217308	0.0125979	0.0406882	0	0.00858032	0	0.067164	0.0106411	0	0	0.0618135	0	0.0278195	0	0.0399412	0	0.0069072
GSM249955	0.18825	0.0866839	0.121484	0.00907474	0	0	0.0459592	0.130801	0.0174057	0	0	0.110218	0	0	0	0.0921949	0.00784366	0.0743991	0	0.0919281	0	0.0237569
GSM249956	0.09437	0.119033	0.126835	0.00134546	0	0.00878999	0.0265577	0.0891211	0	0.0885917	0	0.090715	0.00696343	0	0	0.078337	0.0665114	0.0030344	0	0.148291	0	0.0515037
GSM249957	0	0.175814	0.223538	0.0207791	0	0.0290565	0.0926953	0.105414	0	0.131061	0	0.0878267	0.00827677	0	0	0.0444341	0	0.0589243	0	0.000906269	0	0.0212738
GSM249958	0.0528593	0.287048	0.162569	0.0343704	0	0.0453291	0.0385663	0.0993416	0	0	0	0.0816424	0.0676407	0	0.0151039	0.00277449	0	0.0838635	0.00187179	0	0	0.0270191
GSM249959	0.023547	0.0727163	0.127514	0.00504056	0	0.0779193	0.210216	0.173103	0	0	0	0.149236	0.0458939	0	0	0.0497579	0	0.055239	0.00289181	0	0	0.00692557
GSM249960	0.129069	0.111054	0.218856	0	0.0129856	0	0.149692	0.0142763	0	0	0	0.1319	0.0463051	0.0623176	0	0.0287761	0.0346407	0.0104989	0	0.00376665	0.0220601	0.0238017
GSM249961	0.0629618	0.0906694	0.102232	0.0287322	0	0.0614203	0.0312465	0.0589506	0	0.0779524	0	0.0963146	0	0	0	0.140453	0.0147319	0.0885793	0	0.13494	0	0.010816
GSM249962	0	0.259739	0.125617	0.0216468	0	0.0507782	0.0469029	0.0829058	0	0.0483737	0	0.111567	0	0.00473572	0	0.14763	0.00187725	0.0492605	0.0174396	0	0	0.0315263
GSM249963	0.0864541	0.117393	0.199293	0	0.119175	0.0403012	0.0277053	0.113992	0.0593317	0.0511056	0	0.0616492	0.00492172	0.0706044	0.00330011	0	0.00757252	0	0	0.0166526	0	0.0205478
GSM249964	0.0318207	0.188189	0.159664	0.03716	0.0349266	0	0.0295092	0.0349576	0	0.15093	0.0191588	0.10202	0	0.0878888	0	0.0171403	0.00244001	0.0800382	0	0.014254	0	0.00990297
GSM249965	0.0911452	0.108371	0.200567	0.000123004	0.0206825	0	0.0897427	0.193632	0	0	0	0.102664	0.0557003	0.0231344	0	0.0495054	0.0199682	0.00792872	0	0.0296137	0	0.00722262
GSM249966	0.255444	0.23297	0.0978784	0.0192398	0	0.0533971	0.00933417	0.025609	0	0.0494797	0	0.0533475	0.0423839	0	0	0.0260988	0.0994622	0	0	0.0353555	0	0
GSM249967	0.105968	0.175413	0.0865496	0.0510497	0.0331646	0	0.0422196	0	0	0.101613	0	0.00180394	0.0381307	0	0.0360935	0.0235704	0	0.136046	0	0.122685	0	0.0456927
GSM249968	0.0952057	0.189319	0.184872	0.0076226	0	0.0505614	0.152238	0.0446961	0	0.00557077	0	0.0784403	0.065898	0	0.0301845	0.00861509	0	0.0390509	0	0.0388571	0	0.00886841
GSM249969	0.22224	0.118479	0.149058	0	0	0.0383809	0.0782076	0.114824	0	0	0	0.14576	0.0511501	0	0	0.0664141	0	0	0	0.0154855	0	0
GSM249970	0	0.196382	0.157867	0.0735312	0	0	0.0355362	0.327742	0	0	0	0.0596599	0.0294171	0	0	0.0632253	0	0.0136046	0	0.0198782	0	0.0231574
GSM249971	0	0.193849	0.0355775	0.0589384	0	0.0542845	0.0529426	0.139365	0	0.039388	0	0.0984153	0.0739588	0	0	0.0960336	0.0168779	0.0992258	0	0.0129173	0	0.0282271
GSM249972	0.0278342	0.122896	0.0172245	0.0439247	0	0.0851375	0.0640539	0.0566388	0	0.210662	0	0.0916428	0.0441601	0	0	0.10391	0	0.131264	0	0	0	0.000651014
GSM249973	0.103763	0.164176	0.121407	0	0	0.0487951	0.0914865	0.033846	0	0.0137711	0	0.0854202	0.0349289	0	0.000497513	0.069999	0.00796423	0.100388	0	0.0991072	0	0.0244495
GSM249974	0.213082	0.248965	0	0.0301089	0	0.0752808	0.0700545	0.00942054	0	0.0653916	0	0.0554371	0.0774381	0	0	0.0607157	0	0.0361348	0.0219645	0	0	0.0360064
GSM249975	0.42146	0.102228	0.134438	0	0.0192191	0	0.0446818	0.0518331	0	0	0	0.135572	0.0114748	0.0203793	0	0.0521821	0	0	0	0.00653224	0	0
GSM249976	0.0224174	0.13648	0.0665268	0.01788	0	0.077206	0.0718869	0	0	0.128606	0	0.202244	0.00893104	0	0	0.140102	0.00140982	0.0953348	0	0	0	0.030974
GSM249977	0.0939576	0.152725	0.104849	0.0115801	0.056076	0	0.137401	0.0916253	0	0.0654506	0	0.0814276	0.0169319	0.0131941	0	0.02222	0.0202873	0.0697611	0	0.0211424	0	0.0413712
GSM249978	0.0508041	0.139779	0.202956	0.0029948	0.00361043	0	0.0611832	0.109171	0	0.0814113	0.0442665	0.0853052	0.00848747	0.0735078	0	0.037601	0.0303404	0.021411	0.00729958	0.0185994	0	0.021271
GSM249979	0.0291414	0.224603	0.138468	0.014306	0	0.0561172	0.0675427	0.0310124	0	0.145953	0	0.0272571	0.0278803	0	0	0.0381162	0.0124332	0.0903606	0	0.084223	0	0.0125859
GSM249980	0.0524456	0.150842	0.0309002	0.0343073	0	0.102895	0.063681	0.176952	0	0	0	0.128127	0.0161288	0	0.160418	0	0.0379437	0	0	0.0221412	0.0232178	0
GSM249981	0.313239	0.192088	0.0966304	0.00804897	0	0.0534884	0.0285063	0.0271348	0	0.0134794	0	0.0435158	0.0684216	0	0.0214905	0.0233701	0.0491089	0	0	0.0614778	0	0
GSM249982	0.00984311	0.241658	0.134847	0.0204636	0	0.0329267	0.0572056	0.0455324	0	0.137968	0	0.0607898	0.0365927	0	0	0.0635453	0.0292937	0.0673464	0	0.0385559	0	0.023431
GSM249983	0.366234	0.0879366	0.0183329	0.0144419	0.0129492	0	0.0311902	0.0581136	0	0.181148	0	0.0215607	0.0142588	0	0.0252016	0.0472389	0.0367894	0.00504664	0	0.063553	0	0.016004
GSM249984	0.117214	0.0955603	0.0919877	0.00870769	0.0365214	0	0.216242	0.0912657	0	0.017176	0	0.124016	0.00829131	0.0573693	0	0.0358347	0	0	0	0.093469	0	0.00634518
GSM249985	0.131383	0.0820287	0.0489215	0.0414948	0	0.0593912	0.0558762	0.0862958	0	0.0525698	0	0.118744	0	0	0	0.0451201	0.053747	0.0548759	0	0.0917091	0	0.0778434
GSM249986	0	0.347345	0.072936	0.0139439	0	0	0.0562404	0.0659839	0	0.112543	0	0.105129	0.0307452	0	0	0.0557009	0	0.0782689	0	0.0162787	0	0.0448846
GSM249987	0.114456	0.034134	0	0.0677818	0	0.122508	0.0400265	0.0800339	0	0.09611	0	0.194401	0	0	0	0.0965551	0	0.0780959	0	0.0714126	0	0.00448629
GSM249988	0	0.284085	0.122934	0.0414934	0	0.0412188	0.0599656	0.0417033	0	0.060994	0	0.0715647	0.0440457	0.0415701	0	0.0731966	0.0530027	0.00160608	0.0254929	0	0	0.0371273
GSM249989	0.107307	0.120897	0.250888	0	0.0251814	0	0.0133318	0.15663	0	0	0	0.106964	0	0	0	0.122817	0.0617525	0	0	0.0198132	0	0.0144189
GSM249990	0.322959	0.143225	0.0810299	0	0.0535051	0	0.12264	0.0481809	0	0.0114278	0	0.0989347	0.00397228	0	0	0.0377633	0	0	0	0.0520139	0	0.0243484
GSM249991	0.281475	0.0300876	0.0424634	0.028073	0	0.0696444	0.0602371	0.158823	0.00387341	0.029983	0	0.0526864	0.0539468	0	0	0.0481812	0	0.015371	0	0.125154	0	0
GSM249992	0.388138	0.114213	0.0872672	0	0	0	0.0151515	0.0202688	0	0.124939	0	0.0312213	0.00848502	0.00520317	0	0.05942	0.0289225	0	0	0.110356	0	0.00641444
GSM249993	0.161603	0.0576513	0.309134	0	0	0.0111667	0.0319907	0	0	0	0	0.163806	0.0196289	0.0520211	0	0.0680543	0.0460581	0.0203869	0.0395172	0	0	0.0189817
GSM249994	0	0.249583	0.209517	0.00682791	0	0.0341404	0.0250473	0.17848	0	0.03163	0	0.154244	0.00765717	0.0028576	0	0.0449275	0.00550517	0	0	0.0230838	0	0.0264995
GSM249995	0.0284317	0.0215499	0	0.0242857	0	0.101595	0.0824128	0.137929	0	0.167131	0	0.0404666	0.15881	0	0	0.0754441	0	0.127836	0.0341072	0	0	0
GSM249996	0.040943	0.104099	0.0602099	0.00973883	0	0.0306132	0.0864776	0.186658	0	0.0181747	0	0.0878221	0.132808	0	0	0.0554346	0	0.139545	0	0.00669452	0	0.0407815
GSM249997	0	0.302266	0.0764755	0	0	0.0211839	0.0706813	0.0373791	0	0.261755	0	0.0378856	0	0.110262	0	0.0122827	0.0212125	0.0026864	0	0.0219544	0	0.0239759
GSM249998	0.113318	0.314798	0	0	0.017996	0	0.0618506	0.161218	0	0.00592511	0	0.0414447	0.142927	0	0.0344914	0	0.00117658	0.0512116	0	0.0221644	0	0.0314787
GSM249999	0.0600803	0	0.0163287	0.0901107	0	0.108042	0.0481147	0.108871	0	0.12459	0	0.0278597	0.0494353	0	0	0.162412	0.0105062	0.0380843	0	0.124289	0.0312768	0
GSM250000	0	0.235668	0.133368	0	0.014527	0	0.038459	0.168191	0	0	0.0184878	0.10831	0	0.0695827	0	0.047348	0.0578576	0.00288718	0	0.0606444	0	0.0446694
GSM250001	0.128248	0.136423	0.193276	0	0.0406801	0	0.145321	0.106726	0	0.0310581	0	0.0767588	0	0.00475217	0	0.0551348	0.013923	0.0103314	0	0.0317821	0	0.025584

## Sheet: table S8
Supplementary Table S8. GSE30161 analysis of infiltrating cells in the immune microenvironment by bulkRNAseq in cibersort.
samples	Macrophages M0	Macrophages M2	Macrophages M1	Monocytes	B cells naive	B cells memory	Plasma cells	T cells CD8	T cells CD4 naive	T cells CD4 memory resting	T cells CD4 memory activated	T cells follicular helper	T cells regulatory (Tregs)	T cells gamma delta	NK cells resting	NK cells activated	Dendritic cells resting	Dendritic cells activated	Mast cells resting	Mast cells activated	Eosinophils	Neutrophils
GSM746861	0.0189349	0.0827215	0	0.0285824	0	0.218943	0.222268	0.0254106	0	0.115525	0	0.0518704	0.120919	0	0	0.104435	0	0.00242328	0	0.00796758	0	0
GSM746862	0.0551057	0.0899973	0.0296827	0.0561877	0	0.224042	0.130586	0.0720431	0.0844815	0	0	0.00192245	0.170906	0	0	0.085046	0	0	0	0	0	0
GSM746863	0.0609814	0	0.00962254	0.0250799	0	0.304505	0.207966	0	0	0.0998022	0	0.00435956	0.0834619	0	0	0.0903057	0	0.0459699	0.0595239	0	0.00842228	0
GSM746864	0	0.0991695	0.00443921	0.00857396	0	0.282775	0.197429	0.0462915	0	0.0297763	0	0.103227	0.0507502	0.00216226	0	0.125592	0	0.0104328	0.0355871	0	0	0.00379336
GSM746865	0.0508187	0.0843912	0	0.0497431	0	0.0898452	0.129891	0.157078	0.0696965	0	0	0.114328	0.101248	0	0	0.150804	0	0	0.00215584	0	0	0
GSM746866	0	0	0.0290678	0.0944932	0	0.0947618	0.137828	0.0626171	0	0.16323	0	0	0.216853	0	0	0.147393	0	0	0	0.0477338	0	0.00602186
GSM746867	0	0.0975259	0	0.072149	0	0.11052	0.0836286	0.0835745	0	0.0936825	0	0.0957452	0.210395	0	0.0134985	0.121712	0	0	0.0175681	0	0	0
GSM746868	0.0433705	0.038174	0.0192127	0.0605727	0	0.112113	0.11447	0.0417137	0	0.235231	0	0.117063	0.0608788	0	0	0.0981977	0	0.0590031	0	0	0	0
GSM746869	0.000180179	0.0499667	0.0042812	0.0864692	0	0.169498	0.0949366	0.12157	0	0.00660732	0	0.15024	0.11651	0	0.0199269	0.108189	0	0	0	0.0584376	0	0.0131875
GSM746870	0	0.231055	0	0.120424	0	0.185382	0.0708149	0.105318	0.00357304	0.0310013	0	0.0245787	0.102081	0	0	0.0576534	0	0.0472695	0.0202847	0	0	0.000565059
GSM746871	0.069839	0	0	0.0576516	0	0.193217	0.124347	0.0456949	0.0372547	0	0	0.0521507	0.194221	0	0	0.1892	0	0.0225551	0.0138691	0	0	0
GSM746872	0.0181157	0.053501	0.00204395	0	0	0.211814	0.167923	0.262586	0	1.42e-05	0	0.0258546	0.153195	0	0	0.0899296	0	0	0	0.0113274	0	0.00369527
GSM746873	0.0379919	0.0946638	0.0218741	0.0397002	0	0.189021	0.0779452	0.00104731	0	0.0770774	0	0.0336123	0.174483	0	0.0278947	0.137131	0	0.0114977	0.0706103	0	0	0.00544965
GSM746874	0	0.187585	0.0392812	0.0921796	0	0.10833	0.102263	0.0752806	0.0259652	0.00211471	0	0.0658799	0.115752	0	0.00648878	0.131926	0	0	0.0455649	0	0	0.00138904
GSM746875	0.0282377	0.0377573	0	0.0415371	0	0.103904	0.179063	0.154666	0	0	0	0.135698	0.0845804	0	0	0.15585	0	0.0356734	0.0430336	0	0	0
GSM746876	0.0698702	0.0433147	0.0182278	0.0365792	0	0.260701	0.134101	0.049802	0.0404657	0	0	0.0483131	0.129529	0	0	0.149759	0	0	0.0193373	0	0	0
GSM746877	0	0.17485	0	0.0385917	0	0.239829	0.0769685	0	0	0.0730403	0	0.160713	0.107057	0	0	0.116822	0	0.012127	0	0	0	0
GSM746878	0.0465038	0.069421	0	0.0485113	0	0.249737	0.142351	0.0886493	0	0	0	0.0157123	0.187752	0	0	0.118302	0	0.00786394	0.0251965	0	0	0
GSM746879	0.0501165	0.0365557	0.00114907	0.0203371	0	0.162697	0.22189	0.114342	0.0746123	0	0	0.0100811	0.118885	0	0	0.118954	0.0142406	0	0.0501584	0	0.00598046	0
GSM746880	0.0589331	0	0.025517	0.0261252	0	0.299471	0.16463	0.0725202	0.0465028	0.042739	0	0	0.0754033	0	0	0.130956	0	0	0.0572024	0	0	0
GSM746881	0.0127323	0.0745256	0.039684	0.0397234	0	0.200568	0.0887297	0.172974	0	0.0804602	0	0.0239787	0.130641	0	0	0.0958143	0.00527302	0	0.0348961	0	0	0
GSM746882	0	0.160096	0	0.098266	0	0.0408117	0.143725	0.214952	0	0	0	0.0434167	0.194847	0	0.0121571	0.0621379	0	0	0	0.0295906	0	0
GSM746883	0.00204776	0.0494831	0	0.10651	0	0.131202	0.105661	0.171603	0	0	0	0.171345	0.0659477	0	0	0.163069	0	0	0.0331311	0	0	0
GSM746884	0.0297789	0.075906	0	0.0388448	0	0.0467068	0.195676	0.0905589	0	0.113545	0	0.0532851	0.162024	0	0	0.146414	0	0.0268637	0.0203959	0	0	0
GSM746885	0.061838	0.00150856	0	0.0733847	0	0.181963	0.18778	0.0671408	0.0978381	0	0	0.0782737	0.095202	0	0	0.143447	0	0	0.0116243	0	0	0
GSM746886	0.0227832	0.113253	0.0139593	0.068244	0	0.245277	0.146797	0.11037	0	0	0	0.0767665	0.10604	0	0	0.0945849	0	0.000592856	0	0.00133256	0	0
GSM746887	0	0.121081	0.0559333	0.0299543	0	0.242648	0.158329	0.0665335	0	0.0632589	0	0.0466293	0.0873218	0	0	0.0936719	0	0	0.0238186	0	0	0.0108207
GSM746888	0.029434	0.113876	0	0.0270966	0	0.177884	0.0705519	0.0539077	0	0.13977	0	0	0.200503	0	0.0226521	0.0441522	0	0.023706	0.0798401	0	0.0166257	0
GSM746889	0	0.140148	0.0422097	0.0513878	0	0.241203	0.13896	0.0909292	0	0.0531662	0	0.0374597	0.076317	0	0	0.0700578	0	0.00490693	0.0532542	0	0	0
GSM746890	0.121597	0	0.0191408	0.0451433	0	0.133331	0.0943614	0	0	0.164834	0	0.077556	0.0248714	0	0	0.170413	0	0	0.141595	0	0	0.00715631
GSM746891	0	0.264454	0	0.0658338	0	0.153886	0.0742707	0.0885009	0	0.021013	0	0.0969133	0.0439134	0	0	0.129069	0	0.0210275	0.0381437	0	0	0.002975
GSM746892	0.0817699	0.0670198	0.0143114	0.0598186	0	0.228617	0.0834619	0.0465183	0	0.0376615	0	0.174232	0.0346326	0	0	0.159602	0	0	0.012355	0	0	0
GSM746893	0.0403367	0.0770877	0.0119861	0.0565206	0	0.240198	0.0936857	0.0425936	0.0861247	0	0	0.0349827	0.17031	0	0.0139332	0.101871	0	0	0.030371	0	0	0
GSM746894	0	0.267058	0	0.073213	0	0.0839558	0.116796	0.108687	0.0684302	0	0	0.167263	0.0113521	0	0	0.102007	0	0	0	0	0	0.00123714
GSM746895	0.0590663	0	0.0202441	0.00968294	0	0.324145	0.125968	0.0716967	0.0334791	0	0	0	0.15972	0	0	0.12133	0.00853672	0	0.0544782	0	0.00339498	0.00825786
GSM746896	0.0576219	0.104105	0	0.048824	0	0.215503	0.0964703	0.0476174	0.0653258	0.00544298	0	0.0774682	0.130407	0	0.00884019	0.0911155	0.0200683	0	0.0168748	0	0	0.0143159
GSM746897	0.0231675	0.118085	0.0130791	0.104317	0	0.108967	0.123904	0.0803903	0.0846119	0	0	0.0905349	0.0897272	0	0.0690125	0.0721823	0	0	0	0.0220222	0	0
GSM746898	0.00394257	0.02199	0.0163602	0.0379303	0	0.282838	0.248144	0.0640063	0	0.0938887	0	0.0361735	0.076198	0	0	0.107592	0.00240341	0	0	0.00282393	0	0.00570881
GSM746899	0.0452726	0.0741247	0.0317843	0.044203	0	0.181513	0.20827	0.0333041	0	0.0837062	0	0	0.0443122	0	0	0.151327	0.00762012	0	0.0945626	0	0	0
GSM746900	0.0796769	0.0417219	0	0.0132895	0	0.206007	0.115082	0.0596202	0	0.0864984	0	0.0996586	0.0979361	0	0	0.144816	0	0.0237948	0.0318992	0	0	0
GSM746901	0	0.125426	0	0.0640289	0	0.0951145	0.098847	0.0616487	0	0.113397	0	0.283354	0.0155887	0	0	0.120426	0	0.00984704	0	0.0123222	0	0
GSM746902	0	0.115601	0.0108923	0.0460694	0	0.258801	0.128639	0.109178	0	0.10535	0	0.045277	0.0678023	0	0	0.0732039	0	0	0	0.017911	0.00608748	0.0151867
GSM746903	0.0580024	0.0238892	0.0147123	0.0230566	0	0.12512	0.0916547	0.112508	0	0.0720714	0	0	0.304212	0	0.0138443	0.136043	0	0	0	0.0248874	0	0
GSM746904	0.000699106	0.0597615	0.0192832	0.0109087	0	0.353433	0.14698	0.0882234	0	0.0392872	0	0.110002	0.0499995	0	0	0.0842177	0	0.0230006	0	0.0142046	0	0
GSM746905	0	0.149117	0	0.157505	0	0.06837	0.157971	0	0.0812032	0	0	0.140769	0.018465	0	0.110358	0.0166397	0	0.0894987	0.010103	0	0	0
GSM746906	0.00354676	0.052689	0.00161442	0.0207472	0	0.392369	0.188843	0.0760996	0	0.0140317	0	0.095297	0.0522683	0	0	0.0877828	0	0.00456137	0.01015	0	0	0
GSM746907	0.00107537	0.0387183	0.0415202	0.0628319	0	0.33046	0.162206	0	0	0.0834228	0	0.000285164	0.223035	0	0.0309998	0.00096787	0	0	0	0.0244782	0	0
GSM746908	0.0199515	0.0950118	0.000315308	0.0308918	0	0.116879	0.0765403	0.0397555	0	0.256174	0	0	0.180091	0	0	0.0980049	0	0.0207218	0.0656627	0	0	0
GSM746909	0.00387509	0.138543	0.023728	0.148637	0	0.222805	0.129029	0	0.100666	0	0	0	0.0754374	0	0.0330295	0.0680199	0	0	0.0562307	0	0	0
GSM746910	0.0623919	0.0465686	0.0318261	0.0401812	0	0.150276	0.179565	0.168445	0.0207964	0	0	0.0736016	0.105765	0	0.00586558	0.0925611	0	0	0.0221553	0	0	0
GSM746911	0	0.145248	0.00886653	0.0177848	0	0.291025	0.0915126	0.0707659	0	0	0	0.0832017	0.117244	0	0	0.142067	0	0.00179308	0.0304915	0	0	0
GSM746912	0.0461937	0.0225927	0.00502595	0.0423241	0	0.1682	0.0588886	0.095423	0	0.12241	0	0.0902364	0.0928821	0	0	0.183727	0	0	0.0576357	0	0	0.0144599
GSM746913	0	0.0929943	0.0550643	0	0	0.290933	0.119943	0.0766893	0.0445382	0	0	0.0208481	0.0660907	0	0	0.109234	0.054381	0	0.0560599	0	0.00172798	0.011496
GSM746914	0.0542458	0.0890376	0	0.0417695	0	0.157169	0.0646484	0	0.00414248	0.0821255	0	0	0.0901799	0	0	0.236379	0	0.0508959	0.107618	0	0.00137496	0.0204141
GSM746915	0.0260934	0.0575287	0	0.0495176	0	0.17446	0.12641	0	0	0.182074	0	0.0891072	0.0888681	0	0	0.172698	0	0	0.0332434	0	0	0
GSM746916	0.111794	0.0160088	0	0.0468401	0	0.128749	0.0672557	0	0	0.25009	0	0	0.14259	0	0	0.107642	0.00901011	0	0.120021	0	0	0
GSM746917	0	0.0737794	0.00818049	0	0	0.322959	0.200053	0.119128	0	0	0	0	0.140253	0	0	0.0780961	0	0.0256237	0.0118339	0	0	0.0200917
GSM746918	0.0273814	0.123036	0.0290577	0.0288144	0	0.238714	0.128978	0	0.0707827	0	0	0.0633856	0.152107	0	0	0.121273	0	0	0.0104542	0	0	0.00601617
