# Supplementary figures and images for: Extracellular Vesicle–Packaged circATP2B4 Mediates M2 Macrophage Polarization via miR-532-3p/SREBF1 Axis to Promote Epithelial Ovarian Cancer Metastasis
Source: PubMed Central journal article supplement — Cancer Immunol Res. 2022 Dec 13;11(2):199–216. doi: 10.1158/2326-6066.CIR-22-0410 (PMC9896028; doi:10.1158/2326-6066.cir-22-0410), 2022-12-13

Figure supplementary 1

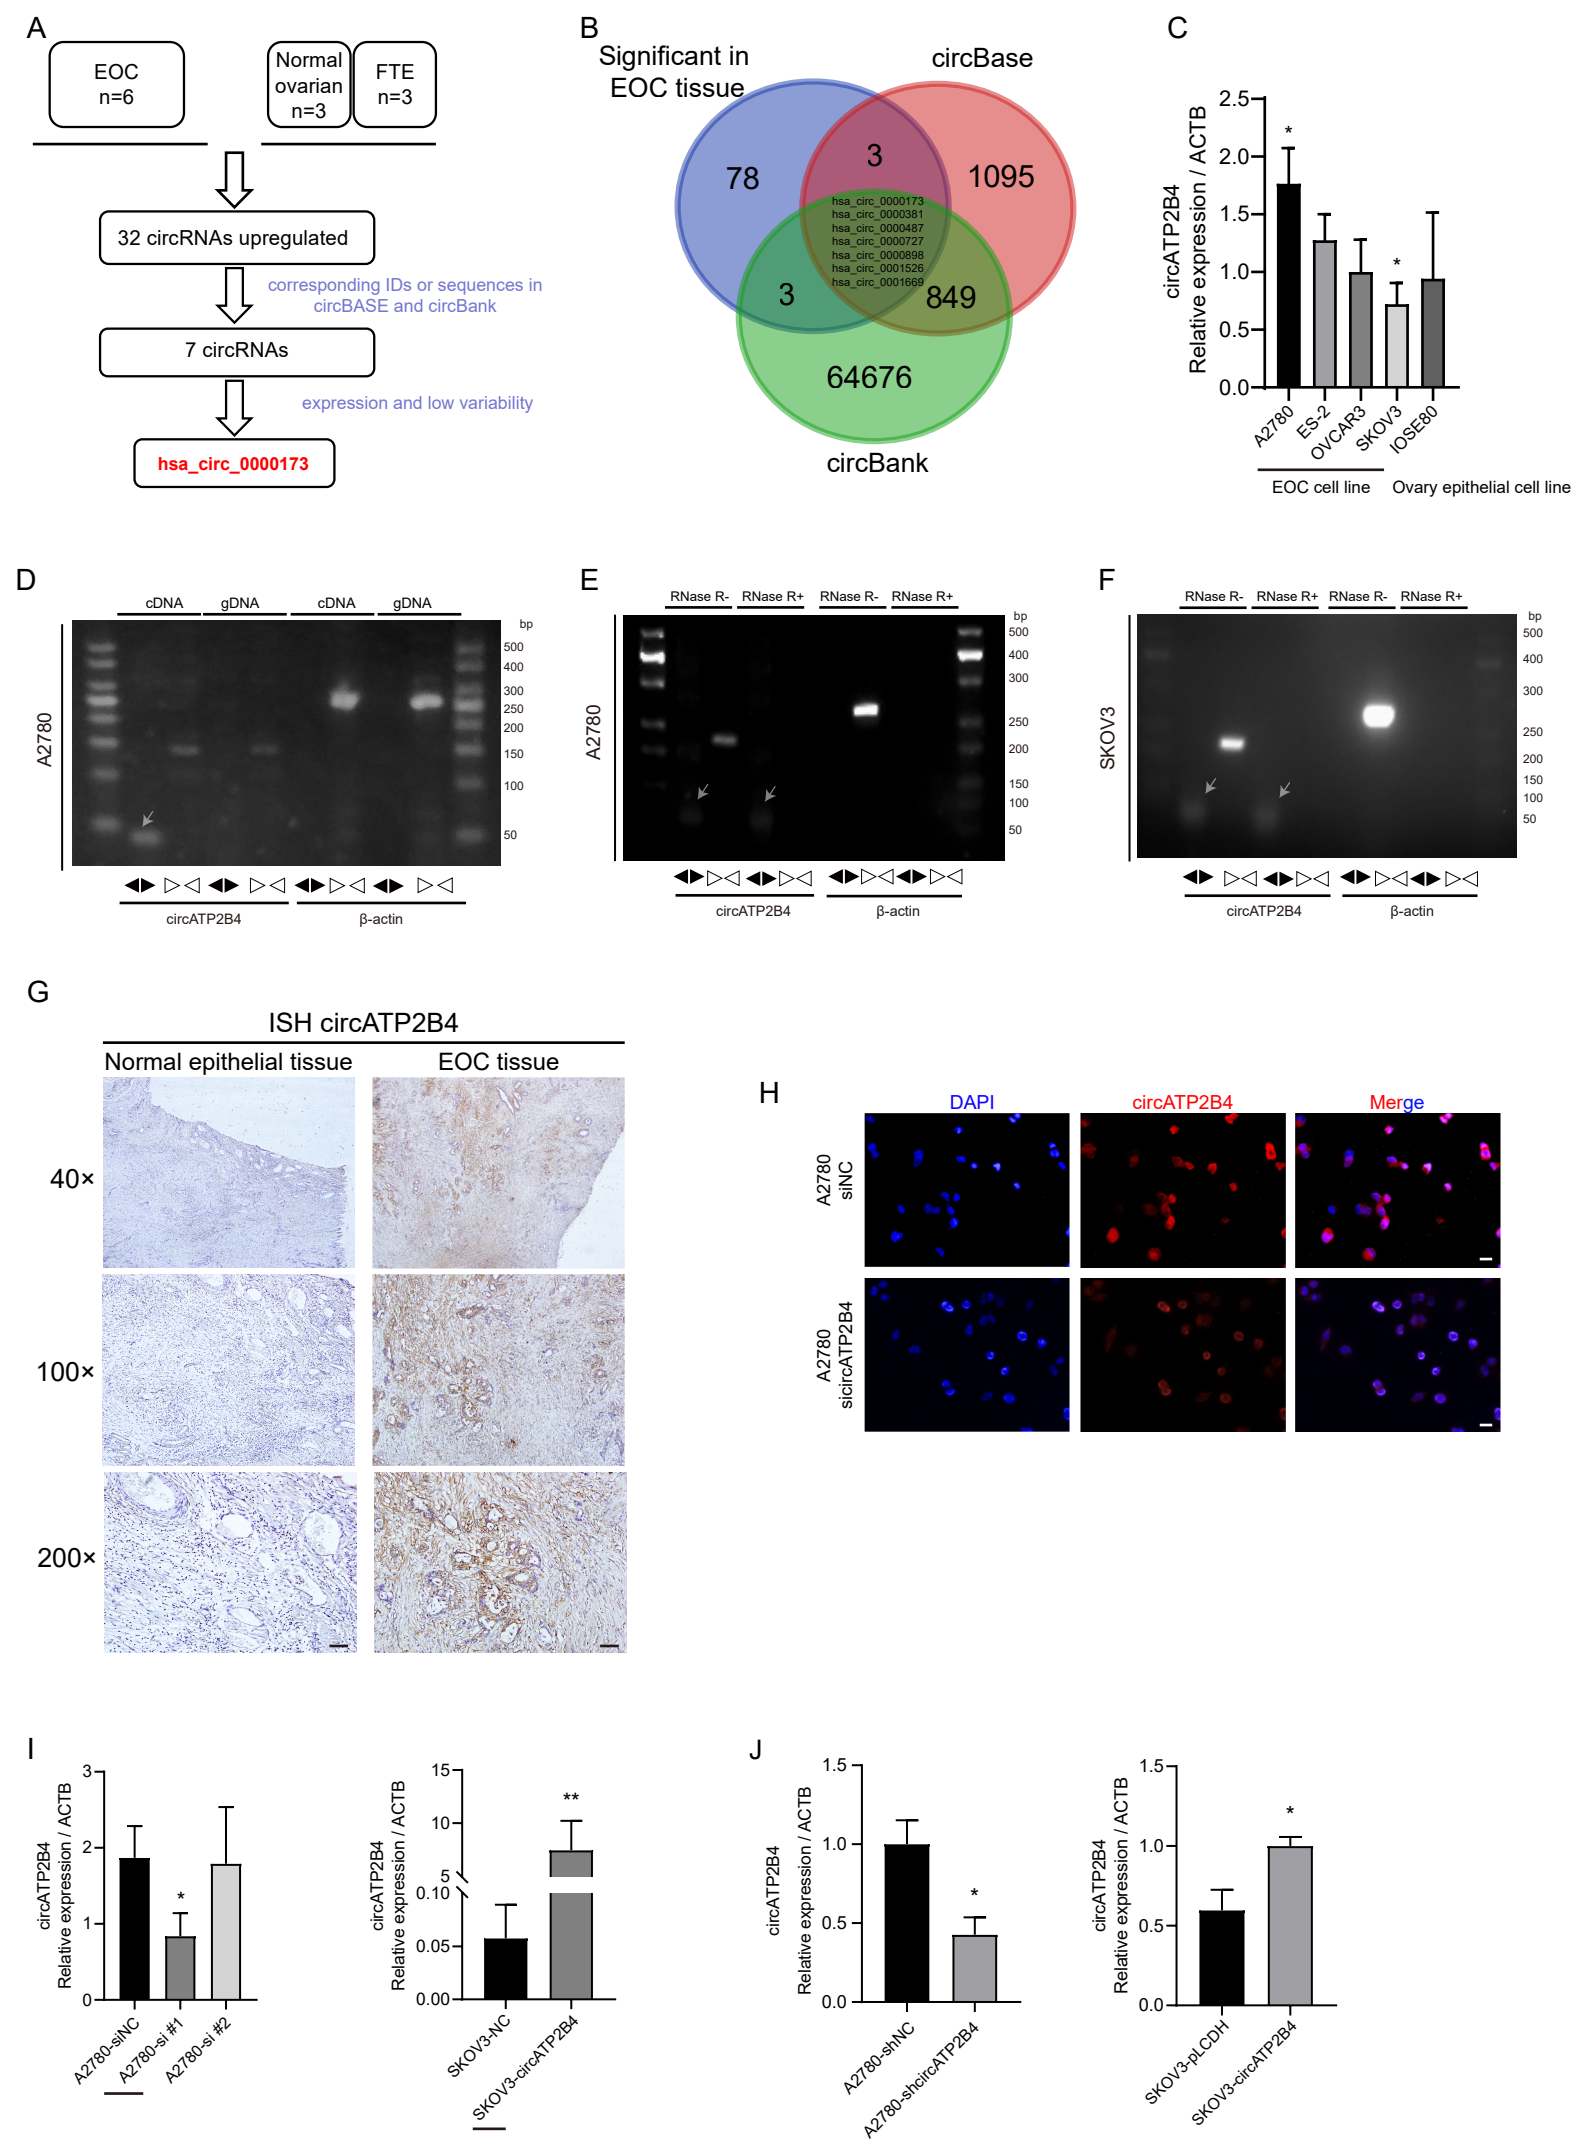

Supplement: cir-22-0410_figure_s1_suppsf1.pdf [file cir-22-0410_figure_s1_suppsf1.pdf]

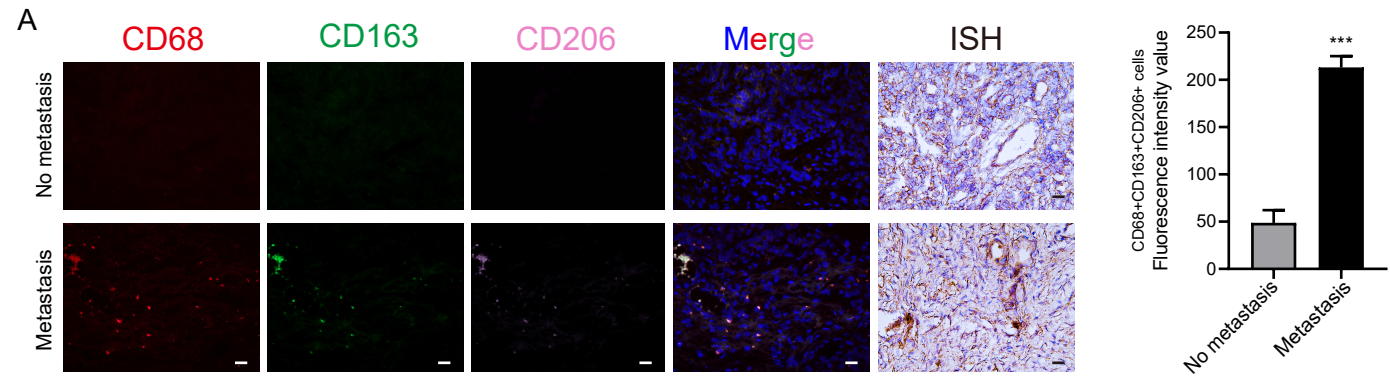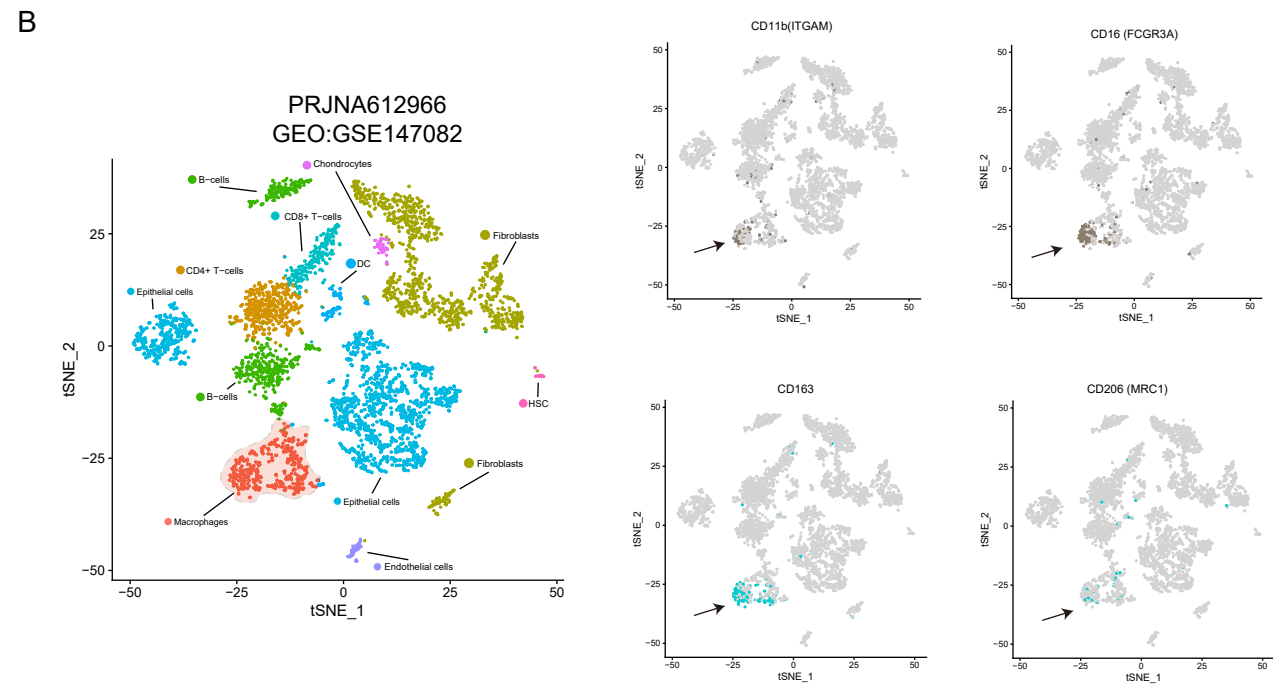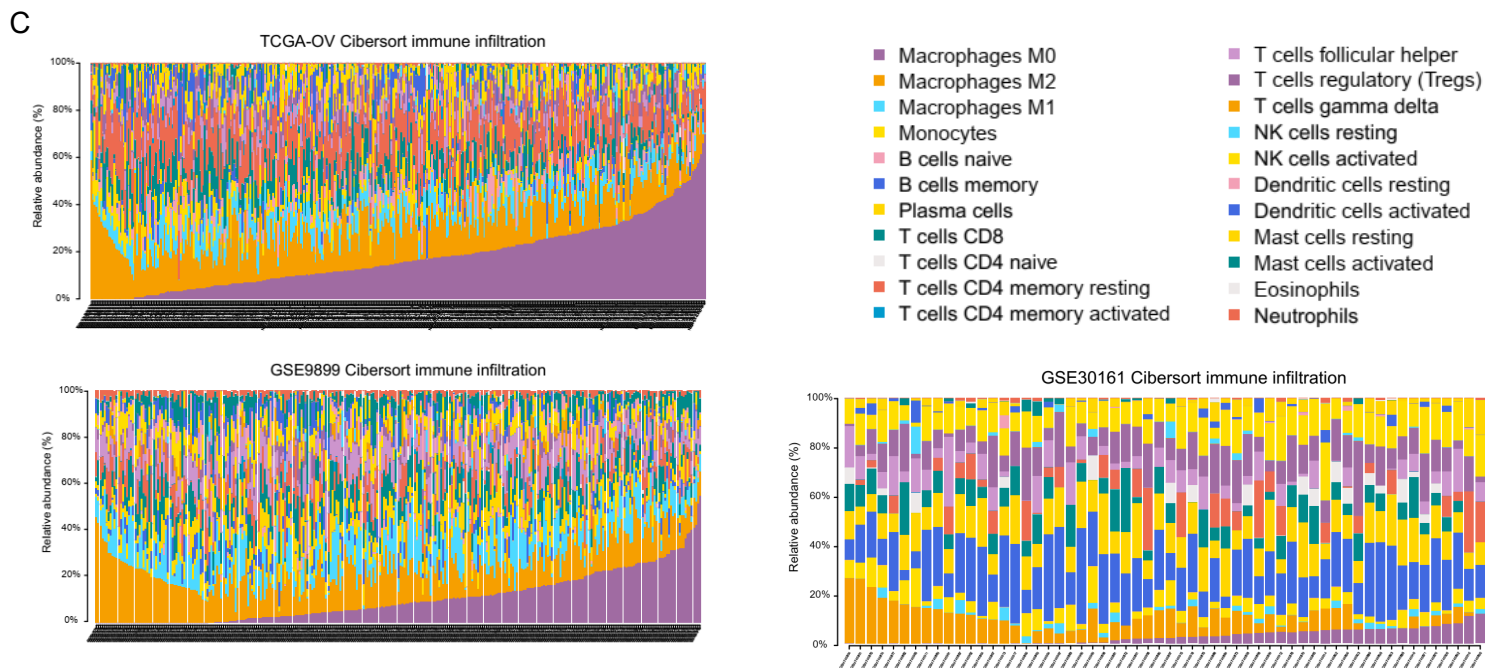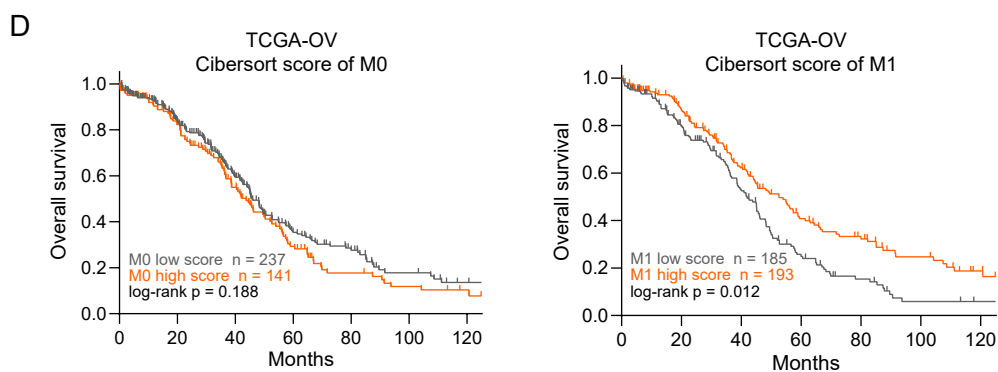

Supplement: cir-22-0410_figure_s2_suppsf2.pdf [file cir-22-0410_figure_s2_suppsf2.pdf]

Figure supplementary 3

A

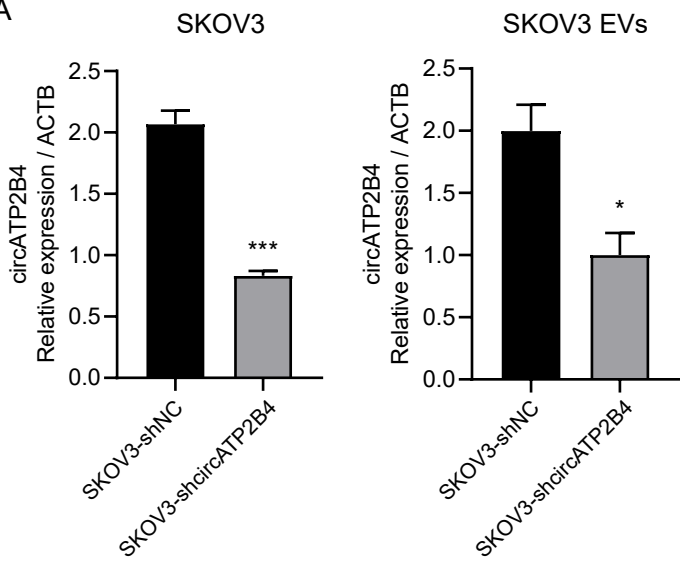

B

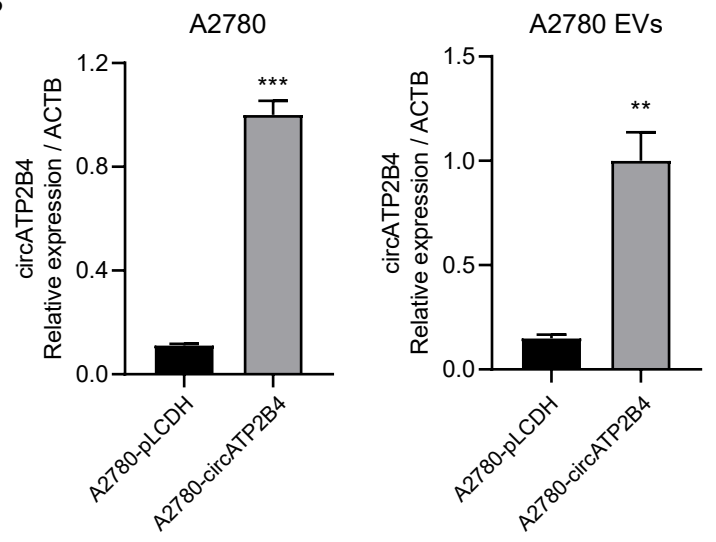

C

BMDM

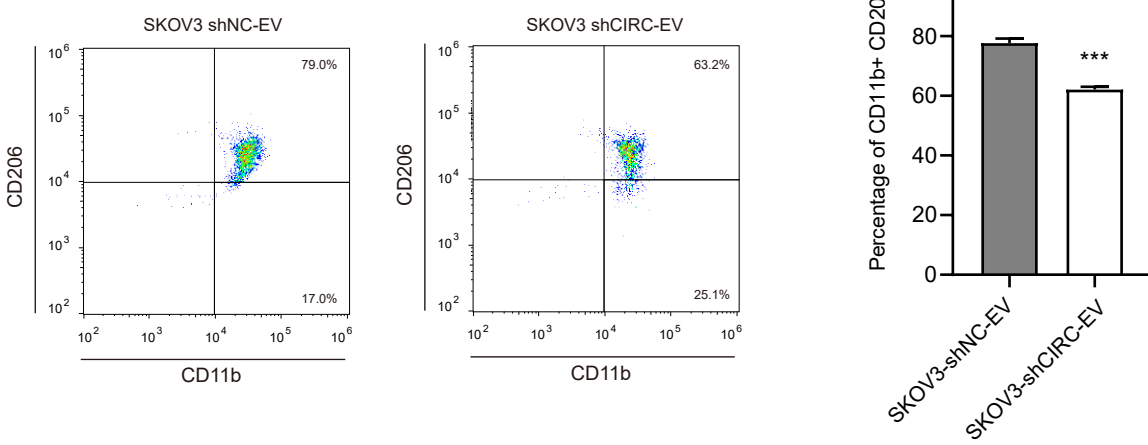

D

BMDM

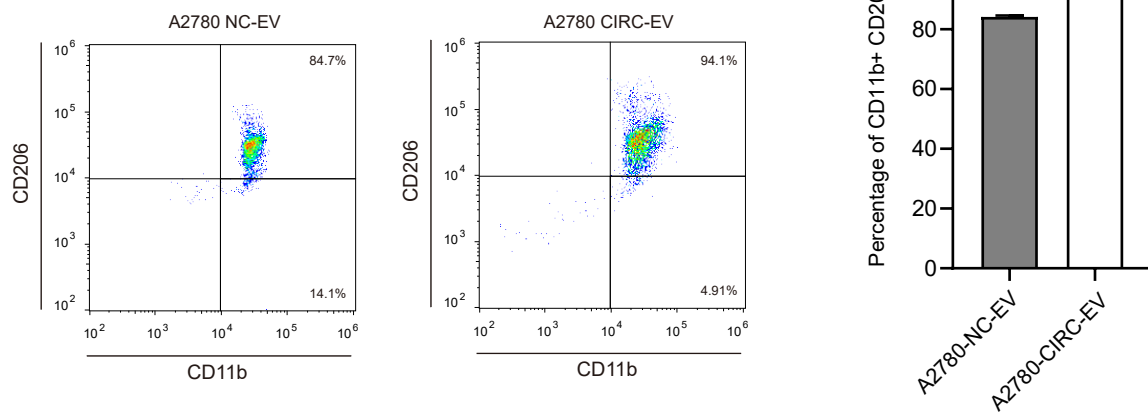

Supplement: cir-22-0410_figure_s3_suppsf3.pdf [file cir-22-0410_figure_s3_suppsf3.pdf]

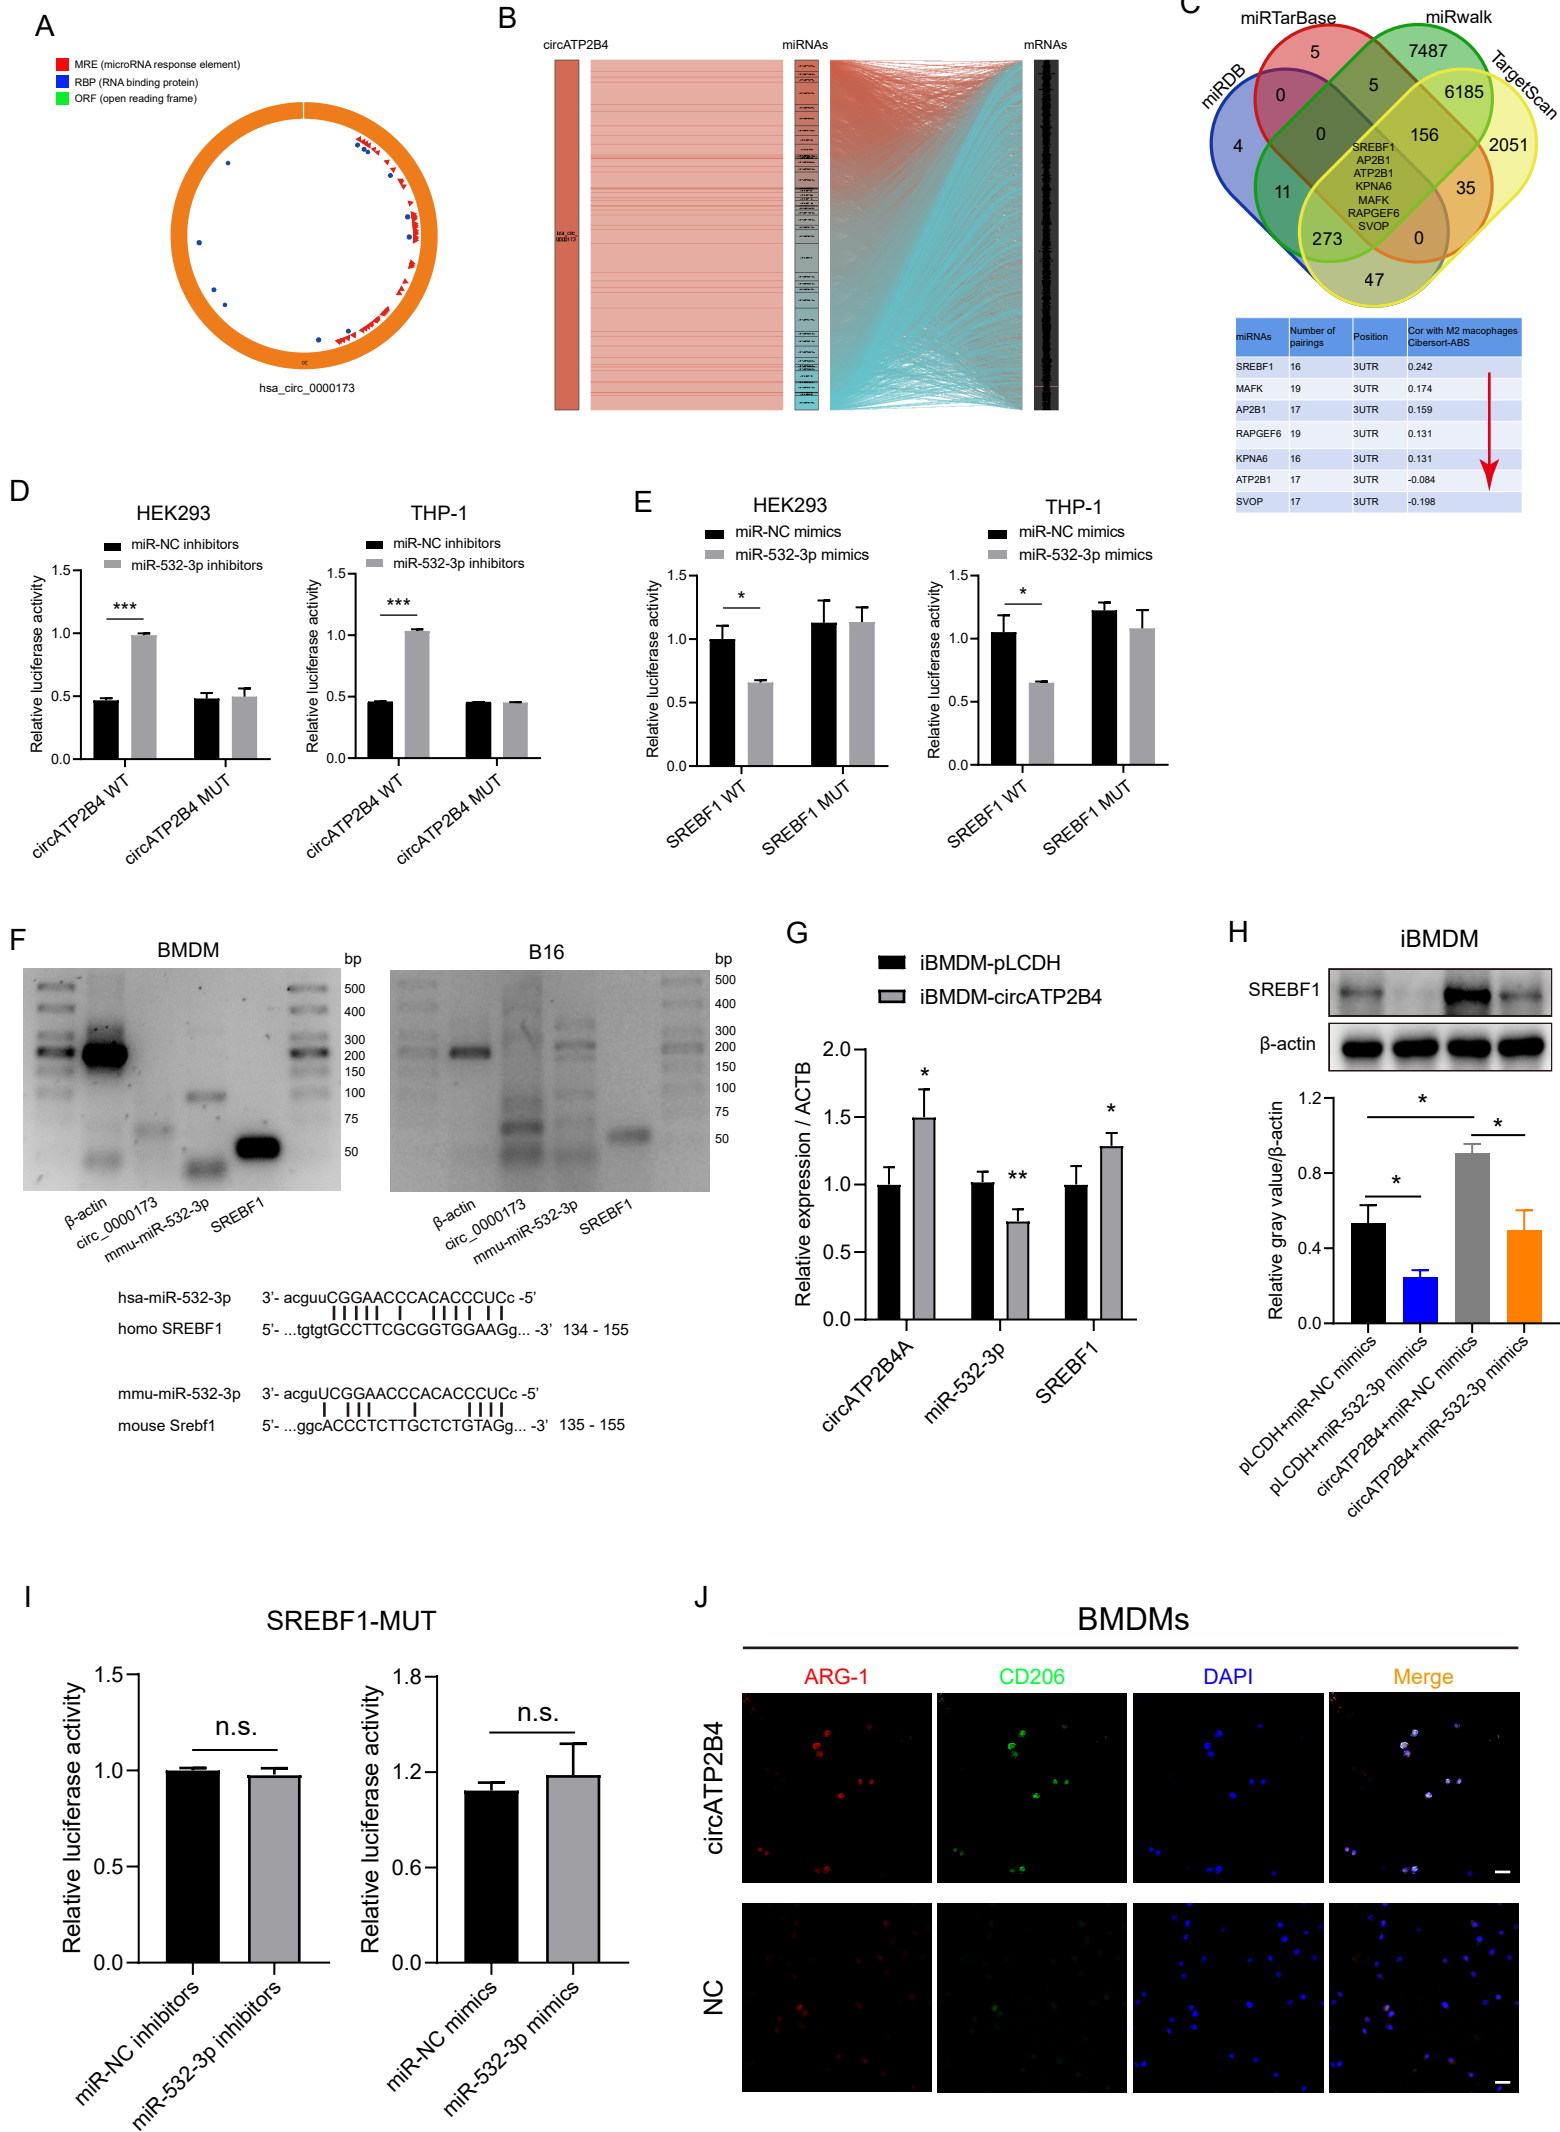

Supplement: cir-22-0410_figure_s4_suppsf4.pdf [file cir-22-0410_figure_s4_suppsf4.pdf]

Figure supplementary 5

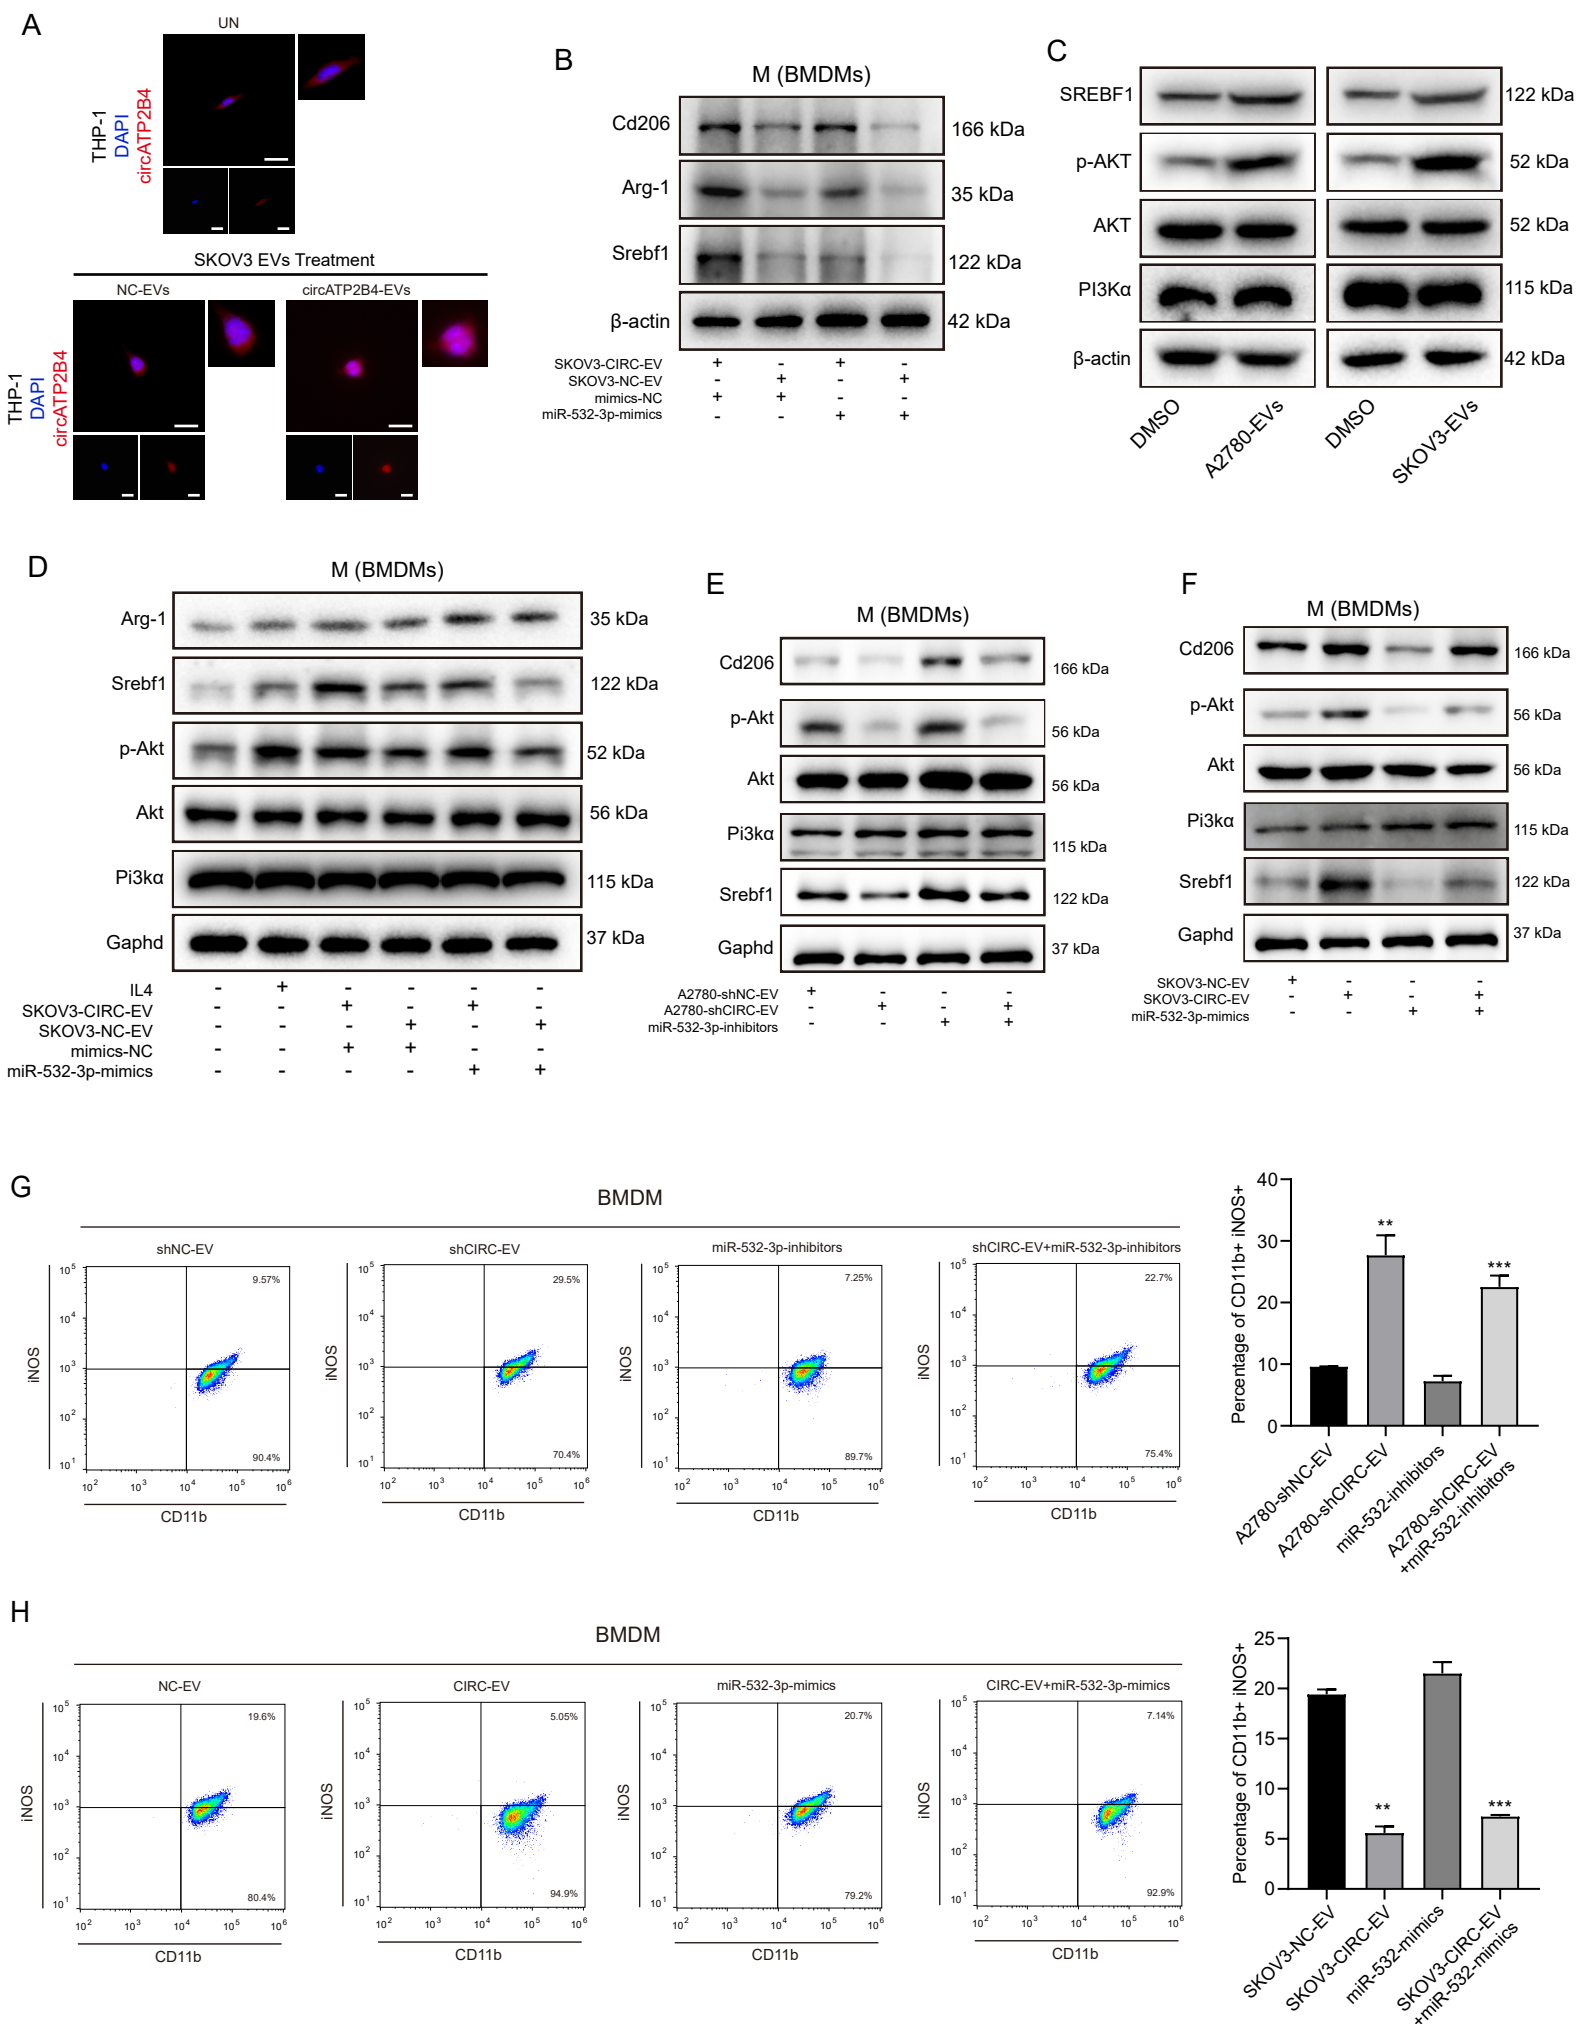

Supplement: cir-22-0410_figure_s5_suppsf5.pdf [file cir-22-0410_figure_s5_suppsf5.pdf]

Figure supplementary 6

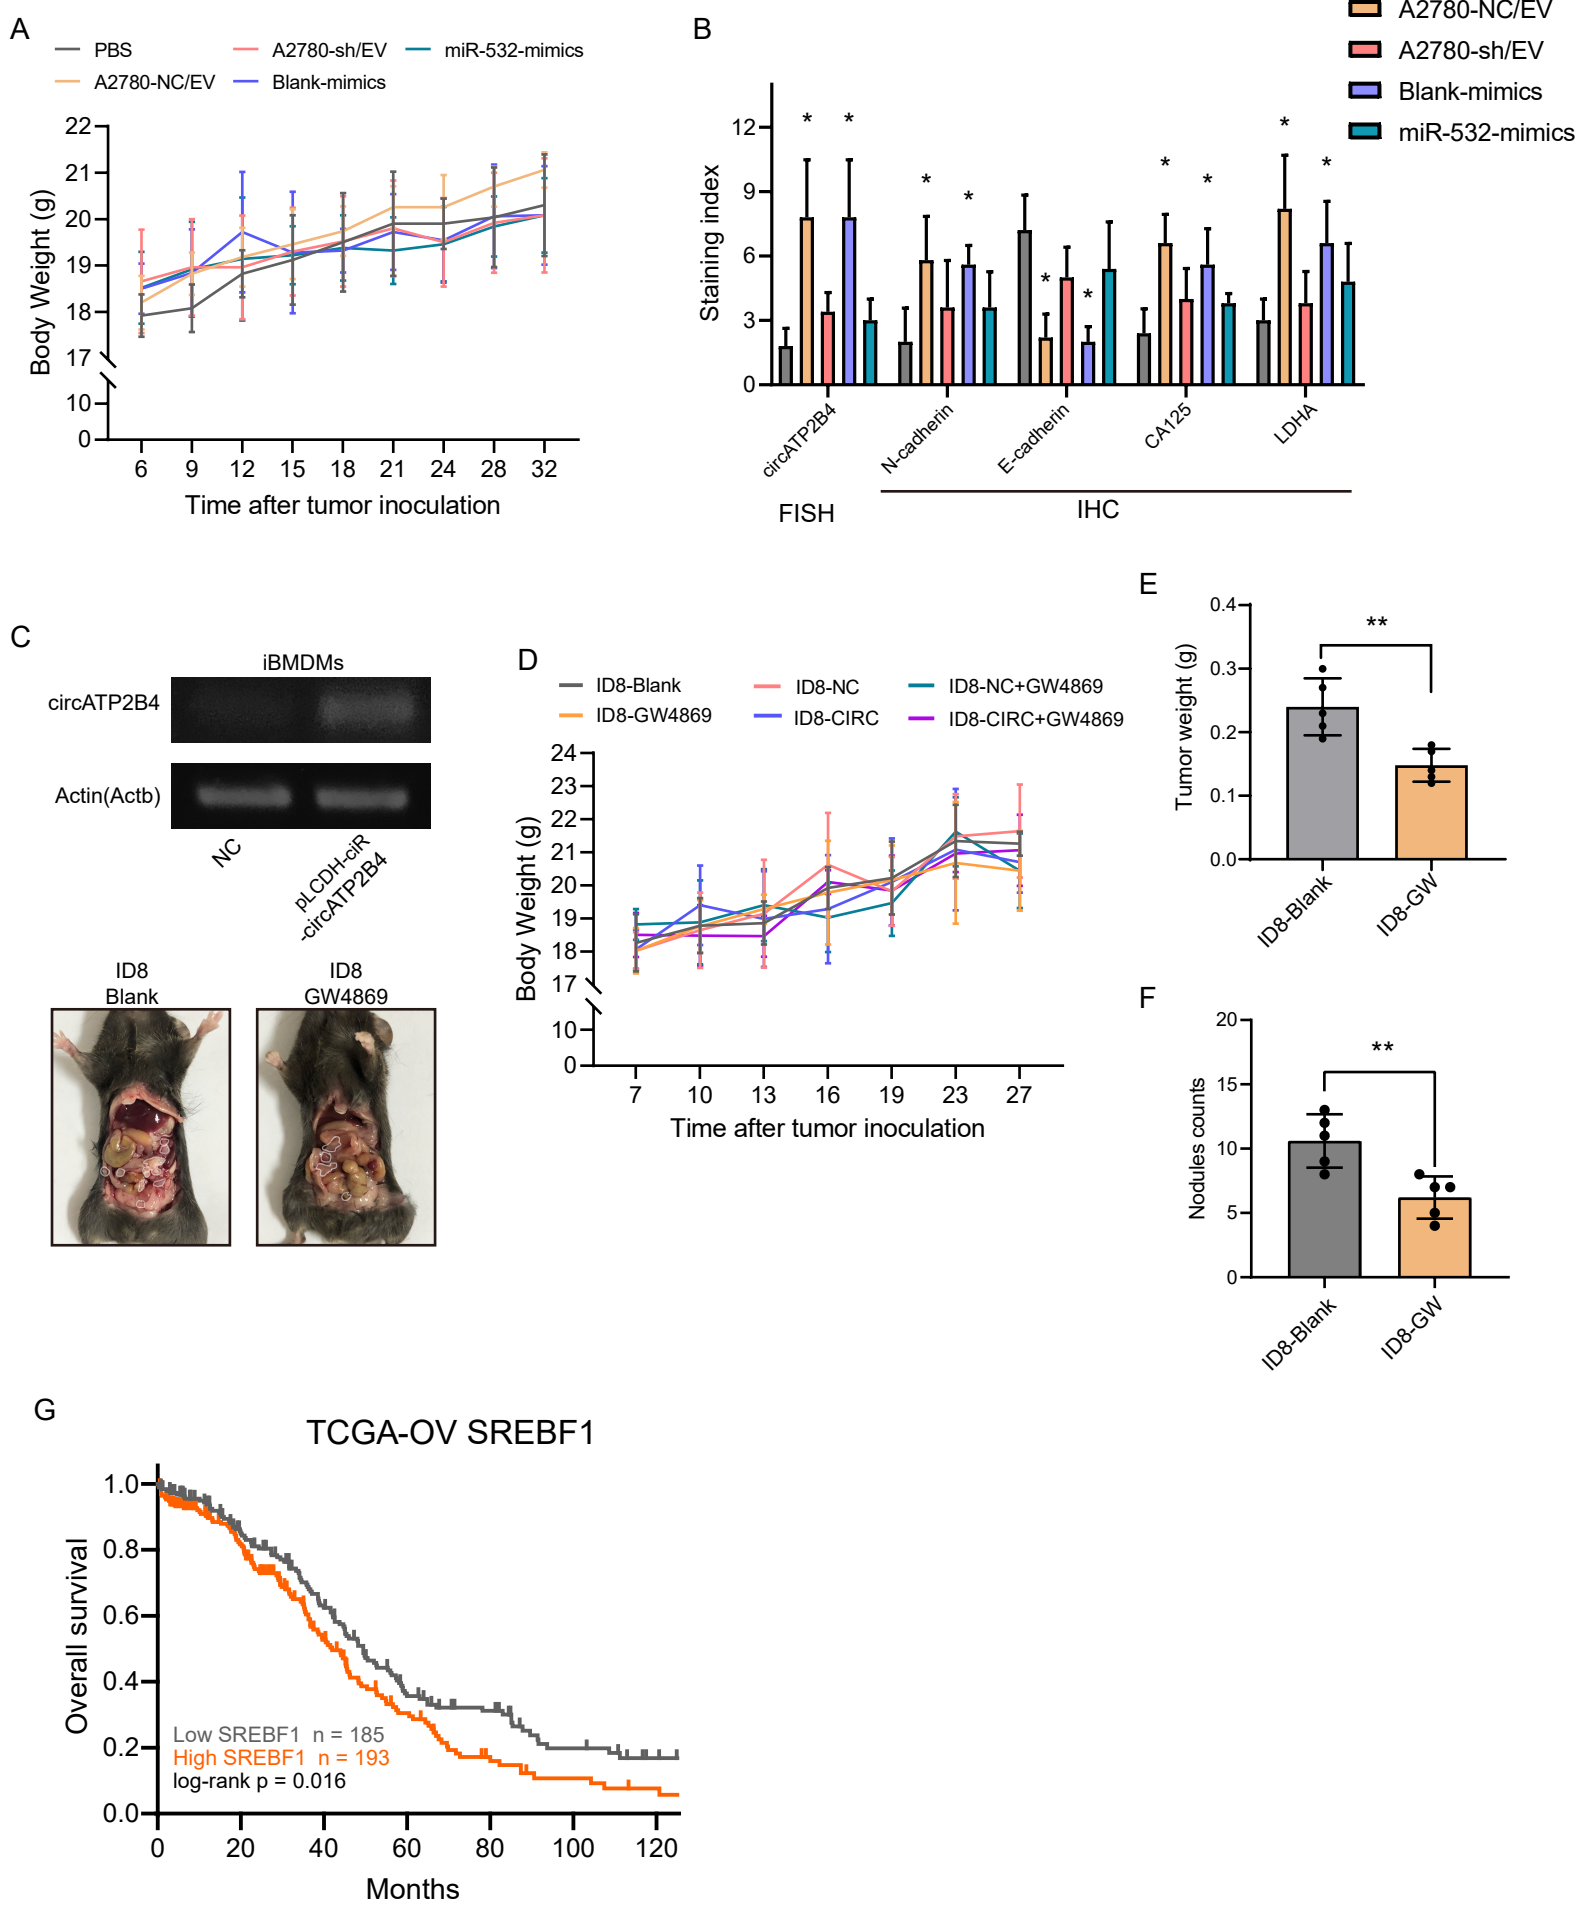

Supplement: cir-22-0410_figure_s6_suppsf6.pdf [file cir-22-0410_figure_s6_suppsf6.pdf]
